# Supplementary material for: Vaska's complex–PMHS combination enabled mild and chemoselective reduction of sulfoxides to sulfides with low catalyst loading
Source: Royal Society of Chemistry journal article supplement (doi:10.1039/d4qo00312h), 2024-01-01

Electronic Supplementary Information

**Vaska's Complex – PMHS Combination Enabled Mild and  
Chemoselective Reduction of Sulfoxides to Sulfides with Low  
Catalyst Loading**

Fang-Fang Xu, Zhong-Lei Ruan, Pei-Qiang Huang\*

Department of Chemistry, Fujian Provincial Key Laboratory of Chemical Biology,

College of Chemistry and Chemical Engineering, Xiamen University

Xiamen, Fujian 361005, P. R. China

E-mail: [pqhuang@xmu.edu.cn](mailto:pqhuang@xmu.edu.cn)

## Table of Contents

|                                                                     |    |
|---------------------------------------------------------------------|----|
| 1. General information .....                                        | 3  |
| 2. The structures of all sulfoxides used.....                       | 4  |
| 3. General procedure and the reductions of sulfoxides.....          | 5  |
| 4. Gram-scale reactions.....                                        | 20 |
| 4.1 Gram-scale reduction of sulfoxide <b>1a</b> .....               | 20 |
| 4.2 Gram-scale reduction of sulfoxide <b>1w</b> .....               | 20 |
| 4.3 Gram-scale reduction of sulfoxide <b>1a</b> in 2-MeTHF .....    | 21 |
| 4.3 Gram-scale reduction of sulfoxide <b>1t</b> in 2-MeTHF .....    | 21 |
| 4.4 Gram-scale reaction at 0.01 mol % catalyst loading.....         | 22 |
| 5. Gram-scale reaction at 0.001 mol % catalyst loading.....         | 22 |
| 6. Gram-scale reaction(32 mmol) at 0.01 mol % catalyst loading..... | 23 |
| 7. Reference .....                                                  | 23 |
| 8. NMR spectra of products .....                                    | 26 |

## 1. General information

All reactions were performed anhydrously under nitrogen atmosphere. All reagents were purchased from commercial suppliers without further purification. Solvent purification was conducted according to Purification of Laboratory Chemicals (Peerrin, D. D.; Armarego, W. L. and Perrins, D. R., Pergamon Press: Oxford, 1980). Yields were calculated based on the weights of chromatographically isolated products or determined by GC methods or <sup>1</sup>H NMR. Reactions were monitored by thin-layer chromatography (TLC) on plates (GF254) supplied by Yantai Chemicals (China). The TLC spots were visualized under ultraviolet light or by staining with an ethanolic solution of phosphomolybdic acid and cerium sulfate or iodine vapor. Flash column chromatography was performed using silica gel (200-300 mesh) from Qingdao Haiyang Chemicals. Melting points were determined on a Büchi M560 Automatic Melting Point apparatus and are uncorrected. NMR spectra were recorded on Bruker AV III 400 and Bruker AV III 500 instruments, and calibrated with tetramethylsilane (TMS) ( $\delta$  H = 0.00 ppm.) and CDCl<sub>3</sub> ( $\delta$  C = 77.00 ppm.) as internal references. Multiplicities were designated as follows: s = singlet, d = doublet, t = triplet, q = quartet, dd = double doublet, m = multiplet. Infrared (IR) spectra were measured on a Nicolet FT-380 spectrometer using film KBr pellet techniques. High-resolution mass spectra analyses were performed on a Fourier transform ion cyclotron resonance (FT-ICR) mass spectrometer (Bruker Daltonics) with a 7-T magnet (Magnex) and an electrospray ionization (ESI) source (Apollo II, Bruker Daltonics) under positive-ion mode. Optical rotations were measured on an Anton Paar MCP-500 polarimeter. THF were distilled over sodium benzophenone ketyl under N<sub>2</sub>. Dichloromethane was distilled over calcium hydride under N<sub>2</sub>. sulfoxides **1e**<sup>1</sup>, **1f**<sup>1</sup>, **1g**<sup>2</sup>, **1h**<sup>1</sup>, **1i**<sup>1</sup>, **1u**<sup>2</sup>, **1v**<sup>3</sup>, **1y**<sup>2</sup>, **1ag**<sup>2</sup> were prepared according to the procedures described in the literature. All other commercially available compounds were used as received.

## 2. The structures of all sulfoxides used

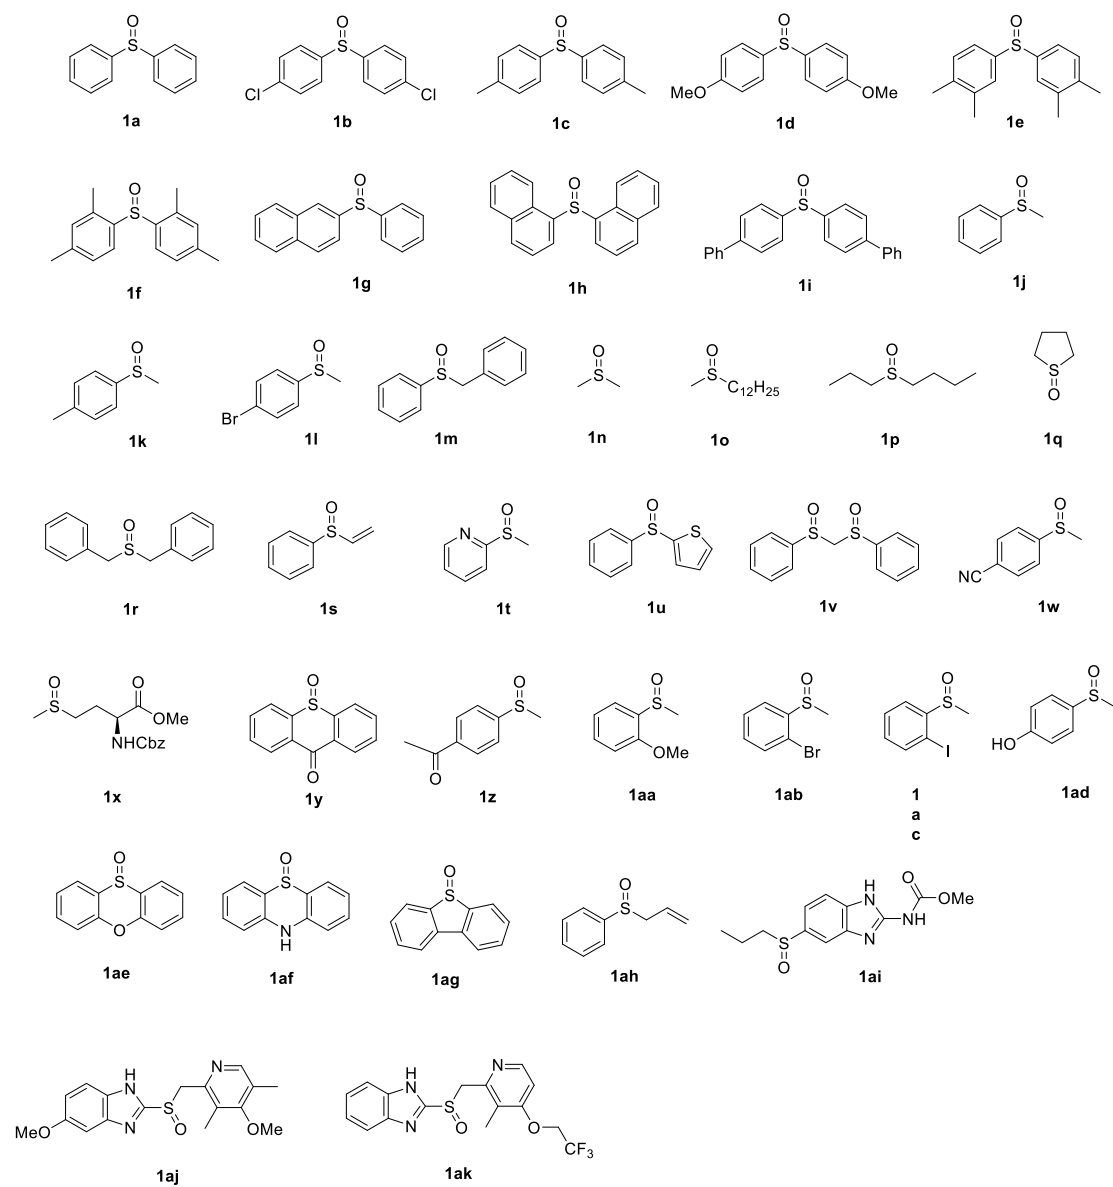

### 3. General procedure and the reductions of sulfoxides

#### General procedure:

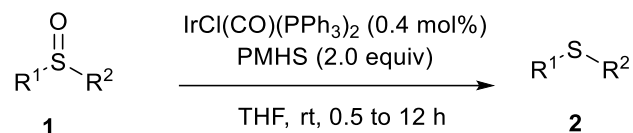

To a flame-dried Schlenk tube were added a sulfoxide **1** (1.0 mmol), IrCl(CO)(PPh<sub>3</sub>)<sub>2</sub> (3.2 mg, 0.4 mol%) and THF (4 mL) under N<sub>2</sub> atmosphere at room temperature. After being stirred at room temperature for 5 min, poly(methylhydrosiloxane) (PMHS) (444 μL, 2 mmol, 2 equiv) was added, and the resulting mixture was stirred at room temperature (25 °C) for 30 min to 12 h. The resulting mixture was filtered through a short pad of Celite and washed with ethyl acetate (20 mL). The filtrate was concentrated under reduced pressure, and the residue was purified by flash chromatography on silica gel eluting with EtOAc/*n*-hexane to afford the desired sulfide **2**.

#### Diphenylsulfane<sup>4</sup>

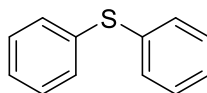

Following the general procedure, the reaction of sulfoxide **1a** (202.3 mg, 1.0 mmol) with IrCl(CO)(PPh<sub>3</sub>)<sub>2</sub> (3.2 mg, 0.4 mol%), PMHS (444 μL, 2 mmol, 2 equiv), THF (4 mL), 3 h gave, after FC (eluent: *n*-hexane), sulfide **2a** as a pale-yellow oil (182.5 mg, yield: 98%); IR (film)  $\tilde{\nu}$ : 3058, 2964, 1783, 1579, 1474, 1438, 1024, 736, 689 cm<sup>-1</sup>; <sup>1</sup>H NMR (500 MHz, CDCl<sub>3</sub>)  $\delta$  7.35 – 7.31 (m, 2H), 7.29 - 7.26 (m, 2H), 7.24 – 7.20 (m, 1H); <sup>13</sup>C NMR (126 MHz, CDCl<sub>3</sub>)  $\delta$  135.7, 130.9, 129.1, 126.99; HRMS (ESI) *m/z* for C<sub>12</sub>H<sub>11</sub>S<sup>+</sup> ([M+H]<sup>+</sup>): 187.0576; found: 187.0575.

#### Bis(4-chlorophenyl)sulfane<sup>3</sup>

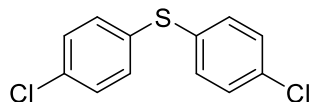

Following the general procedure, the reaction of sulfoxide **1b** (271.2 mg, 1.0 mmol) with IrCl(CO)(PPh<sub>3</sub>)<sub>2</sub> (3.2 mg, 0.4 mol%), PMHS (444 μL, 2 mmol, 2 equiv), THF (4 mL) gave, after FC (eluent: *n*-hexane), sulfide **2b** as a white solid (231.1 mg, yield: 91%); M. p. 86 - 88 °C (lit.: M. p. 88 - 89 °C)<sup>5</sup>; IR (film)  $\tilde{\nu}$ : 2938, 2834, 1591, 1491, 1285, 1244, 1171, 1031, 824 cm<sup>-1</sup>; <sup>1</sup>H NMR (500 MHz, CDCl<sub>3</sub>)  $\delta$  7.28 (d, *J* = 2.3 Hz, 1H), 7.26 (d, *J* = 2.5 Hz, 3H), 7.25 (d, *J* = 4.4 Hz, 3H), 7.23 (d, *J* = 2.3 Hz, 1H); <sup>13</sup>C NMR (126 MHz, CDCl<sub>3</sub>)  $\delta$  133.9, 133.4, 132.3, 129.5; HRMS (ESI) *m/z* for C<sub>12</sub>H<sub>9</sub>Cl<sub>2</sub>S<sup>+</sup> ([M+H]<sup>+</sup>): 254.9797; found: 254.9791.

#### Di-*p*-tolylsulfane<sup>6</sup>

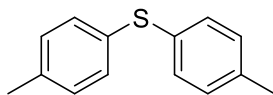

Following the general procedure, the reaction of sulfoxide **1c** (230.3 mg, 1.0 mmol) with IrCl(CO)(PPh<sub>3</sub>)<sub>2</sub> (3.2 mg, 0.4 mol%), PMHS (444 μL, 2 mmol, 2 equiv), THF (4 mL) gave, after FC (eluent: *n*-hexane), sulfide **2c** as a white solid (199.1 mg, yield: 93%); M. p. 56 - 58 °C (lit.: M. p. 53 - 55 °C)<sup>6</sup>; IR (film)  $\tilde{\nu}$ : 3019, 2920, 1584, 1491, 1282, 1088, 1015, 803 cm<sup>-1</sup>; <sup>1</sup>H NMR (500 MHz, CDCl<sub>3</sub>)  $\delta$  7.25 - 7.20 (m, 4H), 7.10 - 7.08 (m, 4H), 2.31 (s, 6H); <sup>13</sup>C NMR (126 MHz, CDCl<sub>3</sub>)  $\delta$  136.8, 132.6, 131.0, 129.8, 21.0 (2C); HRMS (ESI) *m/z* for C<sub>14</sub>H<sub>15</sub>S<sup>+</sup> ([M+H]<sup>+</sup>): 215.0889; found: 215.0891.

#### Bis(4-methoxyphenyl)sulfane<sup>6</sup>

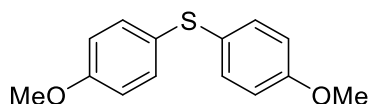

Following the general procedure, the reaction of sulfoxide **1d** (262.3 mg, 1.0 mmol) with IrCl(CO)(PPh<sub>3</sub>)<sub>2</sub> (3.2 mg, 0.4 mol%), PMHS (444 μL, 2 mmol, 2 equiv), THF (4 mL) gave, after FC (eluent: *n*-hexane), sulfide **2d** as a white solid (233.8 mg, yield: 95%); M. p. 47 - 49 °C (lit.: M. p. 43 - 44 °C)<sup>6</sup>; IR (film)  $\tilde{\nu}$ : 2965, 2841, 1591, 1496,

1285, 1248, 1184, 1184, 1032, 837, 813  $\text{cm}^{-1}$ ;  $^1\text{H}$  NMR (500 MHz,  $\text{CDCl}_3$ )  $\delta$  7.31 – 7.24 (m, 4H), 6.85 – 6.79 (m, 4H), 3.76 (s, 6H);  $^{13}\text{C}$  NMR (126 MHz,  $\text{CDCl}_3$ )  $\delta$  159.0, 132.8, 127.5, 114.8, 55.4; HRMS (ESI)  $m/z$  for  $\text{C}_{14}\text{H}_{15}\text{O}_2\text{S}^+$  ( $[\text{M}+\text{H}]^+$ ): 247.0787; found: 247.0789.

#### Bis(3,4-dimethylphenyl)sulfane<sup>6</sup>

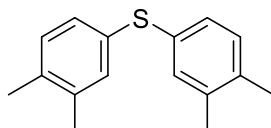

Following the general procedure, the reaction of sulfoxide **1e** (258.4 mg, 1.0 mmol) with  $\text{IrCl}(\text{CO})(\text{PPh}_3)_2$  (3.2 mg, 0.4 mol%), PMHS (444  $\mu\text{L}$ , 2 mmol, 2 equiv), THF (4 mL) gave, after FC (eluent: *n*-hexane), sulfide **2e** as a white solid (227.6 mg, yield: 94%); M. p. 144 - 146  $^\circ\text{C}$  (lit.: M. p. 145 - 147  $^\circ\text{C}$ )<sup>6</sup>; IR (film)  $\tilde{\nu}$ : 2975, 2933, 1592, 1449, 1023, 877, 807, 701  $\text{cm}^{-1}$ ;  $^1\text{H}$  NMR (500 MHz,  $\text{CDCl}_3$ )  $\delta$  7.14 - 7.13 (m, 2H), 7.08 – 6.99 (m, 4H), 2.20 (s, 6H), 2.18 (s, 6H);  $^{13}\text{C}$  NMR (126 MHz,  $\text{CDCl}_3$ )  $\delta$  137.4, 135.4, 132.8, 132.1, 130.3, 128.5, 19.6, 19.3; HRMS (ESI)  $m/z$  for  $\text{C}_{16}\text{H}_{19}\text{S}^+$  ( $[\text{M}+\text{H}]^+$ ): 243.1202; found: 243.1213.

#### Bis(2,4-dimethylphenyl)sulfane<sup>7</sup>

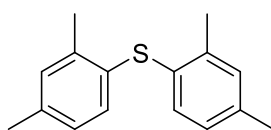

Following the general procedure, the reaction of sulfoxide **1f** (258.4 mg, 1.0 mmol) with  $\text{IrCl}(\text{CO})(\text{PPh}_3)_2$  (3.2 mg, 0.4 mol%), PMHS (444  $\mu\text{L}$ , 2 mmol, 2 equiv), THF (4 mL) gave, after FC (eluent: *n*-hexane), sulfide **2f** as a white solid (237.3 mg, yield: 98%); M. p. 134 - 136  $^\circ\text{C}$ ; IR (film)  $\tilde{\nu}$ : 2920, 2856, 1602, 1474, 1232, 1050, 874, 810, 724  $\text{cm}^{-1}$ ;  $^1\text{H}$  NMR (500 MHz,  $\text{CDCl}_3$ )  $\delta$  7.57 - 7.55 (m, 2H), 7.13 - 7.11 (m, 2H), 6.99 (s, 2H), 2.35 (s, 6H), 2.31 (s, 6H);  $^{13}\text{C}$  NMR (126 MHz,  $\text{CDCl}_3$ )  $\delta$  141.1, 138.7, 136.2, 131.4, 127.6, 125.9, 21.0, 18.23; HRMS (ESI)  $m/z$  for  $\text{C}_{16}\text{H}_{19}\text{S}^+$  ( $[\text{M}+\text{H}]^+$ ): 243.1202; found: 243.1209.

### Naphthalen-2-yl(phenyl)sulfane<sup>8</sup>

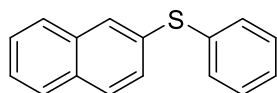

Following the general procedure, the reaction of sulfoxide **1g** (252.3 mg, 1.0 mmol) with IrCl(CO)(PPh<sub>3</sub>)<sub>2</sub> (3.2 mg, 0.4 mol%), PMHS (444 μL, 2 mmol, 2 equiv), THF (4 mL) gave, after FC (eluent: *n*-hexane), sulfide **2g** as a yellow oil (214.8 mg, yield: 91%); IR (film)  $\tilde{\nu}$ : 3054, 2956, 1582, 1477, 1438, 1132, 1024, 813, 741, 690 cm<sup>-1</sup>; <sup>1</sup>H NMR (500 MHz, CDCl<sub>3</sub>)  $\delta$  7.83 – 7.65 (m, 4H), 7.45 – 7.32 (m, 5H), 7.28 - 7.25 (m, 2H), 7.23 – 7.19 (m, 1H); <sup>13</sup>C NMR (126 MHz, CDCl<sub>3</sub>)  $\delta$  135.9, 133.9, 133.1, 132.4, 131.1, 130.0, 129.4, 128.9, 128.9, 127.9, 127.5, 127.2, 126.7, 126.3; HRMS (ESI) *m/z* for C<sub>16</sub>H<sub>13</sub>S<sup>+</sup> ([M+H]<sup>+</sup>): 237.0732; found: 237.0731.

### Di(naphthalen-1-yl)sulfane<sup>6</sup>

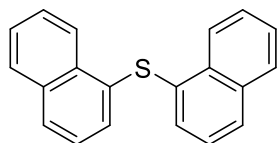

Following the general procedure, the reaction of sulfoxide **1h** (302.4 mg, 1.0 mmol) with IrCl(CO)(PPh<sub>3</sub>)<sub>2</sub> (3.2 mg, 0.4 mol%), PMHS (444 μL, 2 mmol, 2 equiv), THF (4 mL) gave, after FC (eluent: *n*-hexane), sulfide **2h** as a brown solid (277.5 mg, yield: 97%); M. p. 184 - 186 °C (lit.: M. p. 176 - 178 °C)<sup>6</sup>; IR (film)  $\tilde{\nu}$ : 3053, 2919, 1562, 1502, 1379, 1254, 969, 789, 768 cm<sup>-1</sup>; <sup>1</sup>H NMR (400 MHz, CDCl<sub>3</sub>)  $\delta$  8.43 - 8.39 (m, 2H), 7.89 - 7.85 (m, 2H), 7.78 - 7.74 (m, 2H), 7.54 - 7.50 (m, 4H), 7.35 – 7.28 (m, 4H); <sup>13</sup>C NMR (101 MHz, CDCl<sub>3</sub>)  $\delta$  134.1, 132.6, 132.4, 129.9, 128.6, 127.9, 126.7, 126.4, 125.9, 125.1; HRMS (ESI) *m/z* for C<sub>19</sub>H<sub>14</sub>S<sup>+</sup> ([M+H]<sup>+</sup>): 274.0811; found: 274.0802.

### Di([1,1'-biphenyl]-4-yl)sulfane<sup>7</sup>

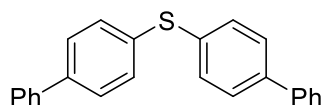

Following the general procedure, the reaction of sulfoxide **1s** (354.5 mg, 1.0 mmol) with IrCl(CO)(PPh<sub>3</sub>)<sub>2</sub> (3.2 mg, 0.4 mol%), PMHS (444 μL, 2 mmol, 2 equiv), THF (4



mL) gave, after FC (eluent: *n*-hexane), sulfide **2s** as a white solid (308.0 mg, yield: 91%); M. p. 197 - 199 °C, IR (film)  $\tilde{\nu}$ : 2963, 1592, 1479, 1395, 837, 758  $\text{cm}^{-1}$ ;  $^1\text{H}$  NMR (500 MHz,  $\text{CDCl}_3$ )  $\delta$  7.58 – 7.51 (m, 8H), 7.47 – 7.40 (m, 8H), 7.36 – 7.32 (m, 2H);  $^{13}\text{C}$  NMR (126 MHz,  $\text{CDCl}_3$ )  $\delta$  140.3, 140.1, 134.8, 131.4, 128.8, 127.9, 127.5, 126.9; HRMS (ESI)  $m/z$  for  $\text{C}_{24}\text{H}_{19}\text{S}^+$  ( $[\text{M}+\text{H}]^+$ ): 339.1202; found: 339.1198.

#### Methyl(phenyl)sulfane<sup>5</sup>

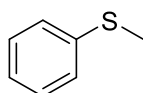

Following the general procedure, the reaction of sulfoxide **1j** (140.0 mg, 1.0 mmol) with  $\text{IrCl}(\text{CO})(\text{PPh}_3)_2$  (3.2 mg, 0.4 mol%), PMHS (444  $\mu\text{L}$ , 2 mmol, 2 equiv), THF (4 mL) gave, after FC (eluent: *n*-hexane), sulfide **2j** as a colorless oil (115.5 mg, yield: 93%); IR (film)  $\tilde{\nu}$ : 2958, 2873, 1465, 1378, 704  $\text{cm}^{-1}$ ;  $^1\text{H}$  NMR (500 MHz,  $\text{CDCl}_3$ )  $\delta$  7.24 – 7.19 (m, 4H), 7.10 - 7.05 (m, 1H), 2.38 (s, 3H);  $^{13}\text{C}$  NMR (126 MHz,  $\text{CDCl}_3$ )  $\delta$  128.6, 126.3, 124.7, 15.5; HRMS (ESI)  $m/z$  for  $\text{C}_7\text{H}_9\text{S}^+$  ( $[\text{M}+\text{H}]^+$ ): 125.0419; found: 125.0413.

#### Methyl(*p*-tolyl)sulfane<sup>5</sup>

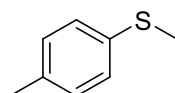

Following the general procedure, the reaction of sulfoxide **1k** (154.2 mg, 1.0 mmol) with  $\text{IrCl}(\text{CO})(\text{PPh}_3)_2$  (3.2 mg, 0.4 mol%), PMHS (444  $\mu\text{L}$ , 2 mmol, 2 equiv), THF (4 mL) gave, after FC (eluent: *n*-hexane), sulfide **2k** as a pale-yellow oil (129.9 mg, yield: 94%); IR (film)  $\tilde{\nu}$ : 2917, 1580, 1492, 799  $\text{cm}^{-1}$ ;  $^1\text{H}$  NMR (500 MHz,  $\text{CDCl}_3$ )  $\delta$  7.19 – 7.14 (m, 2H), 7.10 – 7.06 (m, 2H), 2.44 (s, 3H), 2.29 (s, 3H);  $^{13}\text{C}$  NMR (126 MHz,  $\text{CDCl}_3$ )  $\delta$  135.0, 134.7, 129.6, 127.3, 20.9, 16.5; HRMS (ESI)  $m/z$  for  $\text{C}_8\text{H}_{11}\text{S}^+$  ( $[\text{M}+\text{H}]^+$ ): 139.0576; found: 139.0579.

#### (4-Bromophenyl)(methyl)sulfane<sup>5</sup>

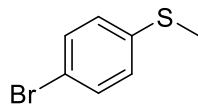

Following the general procedure, the reaction of sulfoxide **1l** (154.2 mg, 1.0 mmol) with IrCl(CO)(PPh<sub>3</sub>)<sub>2</sub> (3.2 mg, 0.4 mol%), PMHS (444 μL, 2 mmol, 2 equiv), THF (4 mL) gave, after FC (eluent: *n*-hexane), sulfide **2l** as a white solid (174.7 mg, yield: 86%); M. p. 38 – 39 °C (lit.: M. p. 34 – 36 °C)<sup>5</sup>; IR (film)  $\tilde{\nu}$ : 2922, 1473, 1093, 1007, 806 cm<sup>-1</sup>; <sup>1</sup>H NMR (500 MHz, CDCl<sub>3</sub>)  $\delta$  7.42 – 7.36 (m, 2H), 7.15 – 7.08 (m, 2H), 2.46 (s, 3H); <sup>13</sup>C NMR (126 MHz, CDCl<sub>3</sub>)  $\delta$  137.7, 131.8, 128.1, 118.6, 15.9; HRMS (ESI)  $m/z$  for C<sub>7</sub>H<sub>8</sub>BrS<sup>+</sup> ([M+H]<sup>+</sup>): 202.9525; found: 202.9527.

### Benzyl(phenyl)sulfane<sup>9</sup>

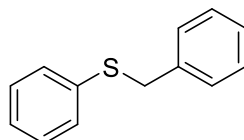

Following the general procedure, the reaction of sulfoxide **1m** (216.3 mg, 1.0 mmol) with IrCl(CO)(PPh<sub>3</sub>)<sub>2</sub> (3.2 mg, 0.4 mol%), PMHS (444 μL, 2 mmol, 2 equiv), THF (4 mL) gave, after FC (eluent: EtOAc/*n*-hexane = 1: 2), sulfide **2m** as a colorless oil (168.1 mg, yield: 84%); IR (film)  $\tilde{\nu}$ : 2960, 1453, 1441, 1035, 743, 690 cm<sup>-1</sup>; <sup>1</sup>H NMR (500 MHz, CDCl<sub>3</sub>)  $\delta$  7.30 – 7.25 (m, 5H), 7.24 – 7.20 (m, 3H), 7.19 – 7.13 (m, 1H), 4.09 (s, 2H); <sup>13</sup>C NMR (126 MHz, CDCl<sub>3</sub>)  $\delta$  137.4, 136.3, 129.7, 128.8, 128.4, 127.1, 126.3, 38.9; HRMS (ESI)  $m/z$  for C<sub>13</sub>H<sub>13</sub>S<sup>+</sup> ([M+H]<sup>+</sup>): 201.0732; found: 201.0735.

### Dimethylsulfane<sup>5</sup>

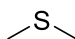

Following the general procedure, the reaction of sulfoxide **1n** (78.1 mg, 1.0 mmol) with IrCl(CO)(PPh<sub>3</sub>)<sub>2</sub> (3.2 mg, 0.4 mol%), PMHS (444 μL, 2 mmol, 2 equiv), THF (4 mL) gave. The crude reaction mixture was analyzed by GC analysis using a tetradecane as internal standard and a 91% yield of title compound **2n** was calculated. Due to the extremely volatile nature of this compound, purification was not performed.

### Dodecyl(methyl)sulfane<sup>4</sup>

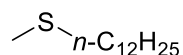

Following the general procedure, the reaction of sulfoxide **1o** (232. mg, 1.0 mmol) with IrCl(CO)(PPh<sub>3</sub>)<sub>2</sub> (3.2 mg, 0.4 mol%), PMHS (444 μL, 2 mmol, 2 equiv), THF (4 mL) gave. The crude reaction mixture was analyzed by <sup>1</sup>H NMR spectroscopy using a trimethoxybenzene internal standard and a 85% yield of title compound **2o** was calculated.

### Dibutylsulfane<sup>4</sup>

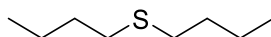

Following the general procedure, the reaction of sulfoxide **1p** (162.3 mg, 1.0 mmol) with IrCl(CO)(PPh<sub>3</sub>)<sub>2</sub> (3.2 mg, 0.4 mol%), PMHS (444 μL, 2 mmol, 2 equiv), THF (4 mL) gave. The crude reaction mixture was analyzed by GC analysis using a tetradecane as internal standard and a 87% yield of title compound **2p** was calculated. Due to the extremely volatile nature of this compound, purification was not performed.

### Tetrahydrothiophene<sup>5</sup>

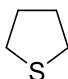

Following the general procedure, the reaction of sulfoxide **1q** (104.2 mg, 1.0 mmol) with IrCl(CO)(PPh<sub>3</sub>)<sub>2</sub> (3.2 mg, 0.4 mol%), PMHS (444 μL, 2 mmol, 2 equiv), THF (4 mL) gave. The crude reaction mixture was analyzed by GC analysis using a tetradecane as internal standard and Due to the extremely volatile nature of this compound, purification was not performed.

### Dibenzylsulfane<sup>8</sup>

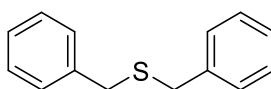

Following the general procedure, the reaction of sulfoxide **1r** (230.3 mg, 1.0 mmol) with IrCl(CO)(PPh<sub>3</sub>)<sub>2</sub> (3.2 mg, 0.4 mol%), PMHS (444 μL, 2 mmol, 2 equiv), THF (4 mL) gave, after FC (eluent: *n*-hexane), sulfide **2r** as a colorless oil (168.1 mg, yield: 82%); IR (film)  $\tilde{\nu}$ : 3027, 2914, 1600, 1493, 1452, 1071, 769, 695 cm<sup>-1</sup>; <sup>1</sup>H NMR (500 MHz, CDCl<sub>3</sub>)  $\delta$  7.33 – 7.25 (m, 8H), 7.25 – 7.19 (m, 2H), 3.58 (s, 4H); <sup>13</sup>C NMR (126 MHz, CDCl<sub>3</sub>)  $\delta$  138.1, 128.9, 128.4, 126.9, 35.5; HRMS (ESI)  $m/z$  for C<sub>13</sub>H<sub>14</sub>S<sup>+</sup> ([M+H]<sup>+</sup>): 202.0811; found: 202.0801.

### Phenyl(vinyl)sulfane<sup>10</sup>

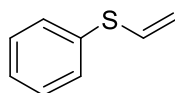

Following the general procedure, the reaction of sulfoxide **1s** (152.2 mg, 1.0 mmol) with IrCl(CO)(PPh<sub>3</sub>)<sub>2</sub> (3.2 mg, 0.4 mol%), PMHS (444 μL, 2 mmol, 2 equiv), THF (4 mL) gave, after FC (eluent: *n*-hexane), sulfide **2s** as a colorless oil (118.5 mg, yield: 87%); IR (film)  $\tilde{\nu}$ : 3059, 1584, 1479, 1439, 1093, 1023, 956, 744, 690 cm<sup>-1</sup>; <sup>1</sup>H NMR (500 MHz, CDCl<sub>3</sub>)  $\delta$  7.36 – 7.31 (m, 2H), 7.26 - 7.22 (m, 2H), 7.19 - 7.15 (m, 1H), 6.48 (dd,  $J$  = 16.6, 9.6 Hz, 1H), 5.32 – 5.25 (m, 2H); <sup>13</sup>C NMR (126 MHz, CDCl<sub>3</sub>)  $\delta$  134.1, 131.7, 130.2, 128.9, 126.9, 115.2; HRMS (ESI)  $m/z$  for C<sub>8</sub>H<sub>9</sub>S<sup>+</sup> ([M+H]<sup>+</sup>): 137.0419; found: 137.0420.

### 2-(Methylthio)pyridine<sup>11</sup>

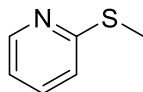

Following the general procedure, the reaction of sulfoxide **1t** (141.2 mg, 1.0 mmol) with IrCl(CO)(PPh<sub>3</sub>)<sub>2</sub> (3.2 mg, 0.4 mol%), PMHS (444 μL, 2 mmol, 2 equiv), THF (4 mL) gave, after FC (eluent: *n*-hexane), sulfide **2t** as a pale-yellow oil (116.3 mg, yield: 93%); IR (film)  $\tilde{\nu}$ : 3044, 2925, 1581, 1455, 1126, 757 cm<sup>-1</sup>; <sup>1</sup>H NMR (500 MHz, CDCl<sub>3</sub>)  $\delta$  8.42 - 8.41 (m, 1H), 7.46 - 7.42 (m, 1H), 7.15 - 7.13 (m, 1H), 6.95 - 6.92 (m, 1H),

2.54 (s, 3H);  $^{13}\text{C}$  NMR (126 MHz,  $\text{CDCl}_3$ )  $\delta$  159.7, 149.2, 135.5, 121.2, 118.9, 12.9; HRMS (ESI)  $m/z$  for  $\text{C}_6\text{H}_8\text{NS}^+$  ( $[\text{M}+\text{H}]^+$ ): 126.0372; found: 126.0378.

### 2-(Phenylthio)thiophene<sup>12</sup>

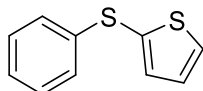

Following the general procedure, the reaction of sulfoxide **1u** (208.3 mg, 1.0 mmol) with  $\text{IrCl}(\text{CO})(\text{PPh}_3)_2$  (3.2 mg, 0.4 mol%), PMHS (444  $\mu\text{L}$ , 2 mmol, 2 equiv), THF (4 mL) gave, after FC (eluent: *n*-hexane), sulfide **2u** as a yellow oil (176.6 mg, yield: 92%); IR (film)  $\tilde{\nu}$ : 3072, 2924, 1582, 1476, 1439, 1402, 1217, 1080, 1023, 847, 738, 688  $\text{cm}^{-1}$ ;  $^1\text{H}$  NMR (500 MHz,  $\text{CDCl}_3$ )  $\delta$  7.38 (d,  $J = 5.4$  Hz, 1H), 7.25 (d,  $J = 3.6$ , 1H), 7.21 – 7.15 (m, 4H), 7.12 – 7.07 (m, 1H), 7.00 (dd,  $J = 5.4, 3.6$  Hz, 1H);  $^{13}\text{C}$  NMR (126 MHz,  $\text{CDCl}_3$ )  $\delta$  138.6, 135.9, 131.2, 131.0, 128.9, 127.8, 127.0, 125.9; HRMS (ESI)  $m/z$  for  $\text{C}_{10}\text{H}_9\text{S}^+$  ( $[\text{M}+\text{H}]^+$ ): 193.0140; found: 193.0141.

### Bis(phenylthio)methane<sup>8</sup>

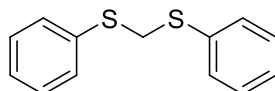

Following the general procedure, the reaction of sulfoxide **1v** (264.4 mg, 1.0 mmol) with  $\text{IrCl}(\text{CO})(\text{PPh}_3)_2$  (3.2 mg, 0.4 mol%), PMHS (444  $\mu\text{L}$ , 2 mmol, 2 equiv), THF (4 mL) gave, after FC (eluent: *n*-hexane), the **2v** product as a white solid (192.6 mg, yield: 83%); M. p. 37 – 40  $^\circ\text{C}$  (lit.: M. p. 39 – 41  $^\circ\text{C}$ )<sup>8</sup>; IR (film)  $\tilde{\nu}$ : 3057, 2961, 1582, 1479, 1438, 1199, 1087, 1024, 737, 688  $\text{cm}^{-1}$ ;  $^1\text{H}$  NMR (500 MHz,  $\text{CDCl}_3$ )  $\delta$  7.45 – 7.39 (m, 4H), 7.33 – 7.28 (m, 4H), 7.27 – 7.21 (m, 2H), 4.34 (s, 2H);  $^{13}\text{C}$  NMR (126 MHz,  $\text{CDCl}_3$ )  $\delta$  135.0, 130.8, 129.1, 127.2, 40.6; HRMS (ESI)  $m/z$  for  $\text{C}_{13}\text{H}_{13}\text{S}_2^+$  ( $[\text{M}+\text{H}]^+$ ): 233.0453; found: 233.0452.

### 4-(Methylthio)benzotrile<sup>13</sup>

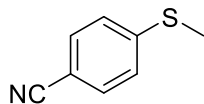

Following the general procedure, the reaction of sulfoxide **1w** (165.2 mg, 1.0 mmol) with IrCl(CO)(PPh<sub>3</sub>)<sub>2</sub> (3.2 mg, 0.4 mol%), PMHS (444 μL, 2 mmol, 2 equiv), THF (4 mL) gave, after FC (eluent: *n*-hexane), sulfide **2w** as a white solid (135.6 mg, yield: 91%); M. p. 59 – 61 °C (lit.: M. p. 61 – 63 °C)<sup>13</sup>; IR (film)  $\tilde{\nu}$ : 2928, 2222, 1596, 1484, 1402, 1087, 817 cm<sup>-1</sup>; <sup>1</sup>H NMR (500 MHz, CDCl<sub>3</sub>)  $\delta$  7.58 – 7.49 (m, 2H), 7.31 – 7.21 (m, 2H), 2.51 (s, 3H); <sup>13</sup>C NMR (126 MHz, CDCl<sub>3</sub>)  $\delta$  146.1, 132.1, 125.4, 118.9, 107.6, 14.6; HRMS (ESI) *m/z* for C<sub>8</sub>H<sub>8</sub>NS<sup>+</sup> ([M+H]<sup>+</sup>): 150.0372; found: 150.0373.

#### Methyl ((benzyloxy)carbonyl)-*L*-methioninate<sup>14</sup>

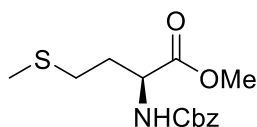

Following the general procedure, the reaction of sulfoxide **1x** (313.4 mg, 1.0 mmol) with IrCl(CO)(PPh<sub>3</sub>)<sub>2</sub> (3.2 mg, 0.4 mol%), PMHS (444 μL, 2 mmol, 2 equiv), THF (4 mL), 60 °C, 8 h gave, after FC (eluent: EtOAc/*n*-hexane = 1: 2), sulfide **2x** as a white solid (220.1 mg, yield: 74%); M. p. 41 - 43 °C (lit.: M. p. 44 – 46 °C)<sup>6</sup>; IR (film)  $\tilde{\nu}$ : 3342, 3028, 2956, 1721, 1531, 1297, 1217, 1130, 1052, 754, 699 cm<sup>-1</sup>; <sup>1</sup>H NMR (500 MHz, CDCl<sub>3</sub>)  $\delta$  7.37 – 7.30 (m, 5H), 5.49 (s, 1H), 5.11 (s, 2H), 4.52 - 4.48 (m, 1H), 3.75 (s, 3H), 2.52 (t, *J* = 7.4 Hz, 2H), 2.19 - 2.12 (m, 1H), 2.08 (s, 3H), 2.00 - 1.93 (m, 1H); <sup>13</sup>C NMR (126 MHz, CDCl<sub>3</sub>)  $\delta$  172.5, 155.9, 136.2, 128.6, 128.3, 128.2, 77.3, 67.1, 53.1, 52.6, 31.9, 29.9, 15.5; HRMS (ESI) *m/z* for C<sub>14</sub>H<sub>20</sub>NO<sub>4</sub>S<sup>+</sup> ([M+H]<sup>+</sup>): 298.1108; found: 298.1108.

#### 9*H*-Thioxanthen-9-one<sup>8</sup>

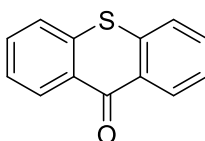

Following the general procedure, the reaction of sulfoxide **1y** (228.3 mg, 1.0 mmol) with IrCl(CO)(PPh<sub>3</sub>)<sub>2</sub> (3.2 mg, 0.4 mol%), PMHS (444 μL, 2 mmol, 2 equiv), THF (4 mL), 6 h gave, after FC (eluent: EtOAc/*n*-hexane = 1: 2), sulfide **2y** as a white solid (169.8 mg, yield: 80%); M. p. 210 - 212 °C (lit.: M. p. 207 – 209 °C)<sup>8</sup>; IR (film)  $\tilde{\nu}$ : 3052, 1654, 1590, 1433, 1320, 1161, 1031, 729, 664 cm<sup>-1</sup>; <sup>1</sup>H NMR (500 MHz, CDCl<sub>3</sub>)  $\delta$  8.63 - 8.61 (m, 2H), 7.66 – 7.56 (m, 4H), 7.50 - 7.47 (m, 2H); <sup>13</sup>C NMR (126 MHz, CDCl<sub>3</sub>)  $\delta$  179.9, 137.3, 132.3, 129.9, 129.2, 126.3, 125.9; HRMS (ESI) *m/z* for C<sub>13</sub>H<sub>9</sub>OS<sup>+</sup> ([M+H]<sup>+</sup>): 213.0369; found: 213.0368.

### 1-(4-(Methylthio)phenyl)ethan-1-one<sup>18</sup>

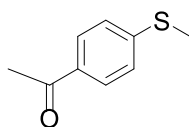

Following the general procedure, the reaction of sulfoxide **1z** (168.2 mg, 1.0 mmol) with IrCl(CO)(PPh<sub>3</sub>)<sub>2</sub> (3.2 mg, 0.4 mol%), PMHS (555 μL, 2.0 mmol, 2.0 equiv), THF (4 mL) gave, after FC (eluent: PE), sulfide **2z** as a white solid (123.3 mg, yield: 81%), M. p. 80 - 81 °C (lit.: M. p. 80.5 – 81.5 °C)<sup>19</sup>; IR (film)  $\tilde{\nu}$ : 3010, 1605, 1580, 1273, 1103, 821 cm<sup>-1</sup>; <sup>1</sup>H NMR (500 MHz, CDCl<sub>3</sub>)  $\delta$  7.85 (d, *J* = 8.2 Hz, 2H), 7.25 (d, *J* = 8.2 Hz, 2H), 2.55 (s, 3H), 2.51 (s, 3H); <sup>13</sup>C NMR (126 MHz, CDCl<sub>3</sub>)  $\delta$  197.0, 145.8, 133.4, 128.6, 124.9, 26.3, 14.6.

### (2-Methoxyphenyl)(methyl)sulfane<sup>15</sup>

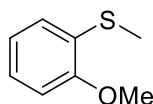

Following the general procedure, the reaction of sulfoxide **1aa** (170.2 mg, 1.0 mmol) with IrCl(CO)(PPh<sub>3</sub>)<sub>2</sub> (3.2 mg, 0.4 mol%), PMHS (444 μL, 2 mmol, 2 equiv), THF (4 mL) gave, after FC (eluent: *n*-hexane), sulfide **2aa** as a colorless oil (138.8 mg, yield: 90%); IR (film)  $\tilde{\nu}$ : 2919, 2835, 1576, 1450, 1240, 1062, 1023, 742 cm<sup>-1</sup>. <sup>1</sup>H NMR (500 MHz, CDCl<sub>3</sub>)  $\delta$  7.14 (m, 2H), 6.95 (m, 1H), 6.82 (m, 1H), 3.87 (s, 3H), 2.41 (s, 3H).

$^{13}\text{C}$  NMR (126 MHz,  $\text{CDCl}_3$ )  $\delta$  154.5, 132.7, 131.7, 124.2, 121.3, 110.4, 55.4, 40.9.  
HRMS (ESI)  $m/z$  for  $\text{C}_8\text{H}_{11}\text{OS}^+$  ( $[\text{M}+\text{H}]^+$ ): 155.0525 ; found: 155.0523.

#### (2-Bromophenyl)(methyl)sulfane<sup>8</sup>

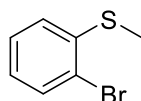

Following the general procedure, the reaction of sulfoxide **1ab** (219.1 mg, 1.0 mmol) with  $\text{IrCl}(\text{CO})(\text{PPh}_3)_2$  (3.2 mg, 0.4 mol%), PMHS (444  $\mu\text{L}$ , 2 mmol, 2 equiv), THF (4 mL), gave, after FC (eluent: *n*-hexane), sulfide **2ab** as a colorless oil (199.1 mg, yield: 99%); IR (film)  $\tilde{\nu}$ : 2919, 1576, 1449, 1250, 1111, 1030, 744  $\text{cm}^{-1}$ ;  $^1\text{H}$  NMR (500 MHz,  $\text{CDCl}_3$ )  $\delta$  7.47 - 7.45 (m, 1H), 7.25 - 7.21 (m, 1H), 7.07 - 7.05 (m, 1H), 6.95 - 6.92 (m, 1H), 2.40 (s, 3H);  $^{13}\text{C}$  NMR (126 MHz,  $\text{CDCl}_3$ )  $\delta$  139.4, 132.3, 127.6, 125.4, 125.1, 121.4, 15.4; HRMS (ESI)  $m/z$  for  $\text{C}_7\text{H}_8\text{BrS}^+$  ( $[\text{M}+\text{H}]^+$ ): 202.9525; found: 202.9524.

#### (2-Bromophenyl)(methyl)sulfane<sup>17</sup>

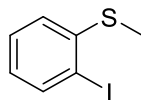

Following the general procedure, the reaction of sulfoxide **1ac** (113 mg, 0.5 mmol) with  $\text{IrCl}(\text{CO})(\text{PPh}_3)_2$  (1.9 mg, 0.4 mol%), PMHS (222  $\mu\text{L}$ , 1 mmol, 1 equiv), THF (2 mL) gave, after FC (eluent: PE), sulfide **2ac** as a light yellow oil (102.5 mg, yield: 82%); IR (film)  $\tilde{\nu}$ : 2935, 1571, 1250, 1104, 652  $\text{cm}^{-1}$ ;  $^1\text{H}$  NMR (400 MHz,  $\text{CDCl}_3$ )  $\delta$  7.78-7.75(m, 1H), 7.34-7.29 (m, 1H), 7.09-7.06 (m, 1H), 8.84-6.80 (m, 1H), 2.44 (s, 3H);  $^{13}\text{C}$  NMR (101 MHz,  $\text{CDCl}_3$ )  $\delta$  142.9, 139.1, 128.6, 125.8, 124.7, 97.2, 16.9.

#### 4-(Methylthio)phenol<sup>5</sup>

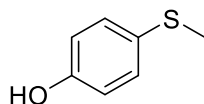

Following the general procedure, the reaction of sulfoxide **1ad** (156.2 mg, 1.0 mmol) with  $\text{IrCl}(\text{CO})(\text{PPh}_3)_2$  (3.2 mg, 0.4 mol%), PMHS (444  $\mu\text{L}$ , 2 mmol, 2 equiv), THF (4



mL) gave, after FC (eluent: EtOAc/*n*-hexane = 1: 2), sulfide **2ad** a white solid (116.2 mg, yield: 83%); M. p. 81 – 82 °C (lit.: M. p. 77 – 79 °C)<sup>5</sup>; IR (film)  $\tilde{\nu}$ : 3233, 2804, 1584, 1499, 1281, 1015, 833  $\text{cm}^{-1}$ ; <sup>1</sup>H NMR (400 MHz, CDCl<sub>3</sub>)  $\delta$  7.24 - 7.21 (m, 2H), 6.85 – 6.70 (m, 2H), 4.88 (s, 1H), 2.44 (s, 3H); <sup>13</sup>C NMR (126 MHz, CDCl<sub>3</sub>)  $\delta$  154.1, 130.4, 128.9, 116.0, 18.0; HRMS (ESI) *m/z* for C<sub>7</sub>H<sub>9</sub>OS<sup>+</sup> ([M+H]<sup>+</sup>): 141.0369; found: 141.0368.

### 10*H*-Phenothiazine<sup>16</sup>

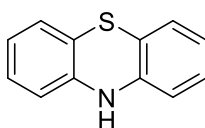

Following the general procedure, the reaction of sulfoxide **1ae** (215.0 mg, 1.0 mmol) with IrCl(CO)(PPh<sub>3</sub>)<sub>2</sub> (3.2 mg, 0.4 mol%), PMHS (444  $\mu\text{L}$ , 2 mmol, 2 equiv), THF (4 mL) gave, after FC (eluent: *n*-hexane), sulfide **2ae** as a white solid (197.1 mg, yield: 99%); M. p. 181 - 183 °C (lit.: M. p. 180 – 184 °C)<sup>16</sup>; IR (film)  $\tilde{\nu}$ : 3331, 1573, 1481, 1311, 745  $\text{cm}^{-1}$ ; <sup>1</sup>H NMR (500 MHz, CDCl<sub>3</sub>)  $\delta$  6.98 (d, *J* = 7.4 Hz, 4H), 6.81 (t, *J* = 7.5 Hz, 2H), 6.52 (d, *J* = 7.9 Hz, 2H), 5.78 (s, 1H); <sup>13</sup>C NMR (126 MHz, CDCl<sub>3</sub>)  $\delta$  141.6, 127.3, 126.8, 122.6, 118.3, 114.4, 114.4. HRMS (ESI) *m/z* for C<sub>12</sub>H<sub>10</sub>NS<sup>+</sup> ([M+H]<sup>+</sup>): 200.0528; found: 200.0531.

### Phenoxathiine<sup>8</sup>

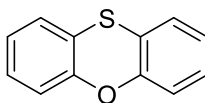

Following the general procedure, the reaction of sulfoxide **1af** (216.3 mg, 1.0 mmol) with IrCl(CO)(PPh<sub>3</sub>)<sub>2</sub> (3.2 mg, 0.4 mol%), PMHS (444  $\mu\text{L}$ , 2 mmol, 2 equiv), THF (4 mL) gave, after FC (eluent: *n*-hexane), sulfide **2af** as a white solid (188.0 mg, yield: 94%); M. p. 53 - 55 °C (lit.: M. p. 54 – 56 °C)<sup>8</sup>; IR (film)  $\tilde{\nu}$ : 3072, 1586, 1449, 1259, 1224, 1081, 760, 746  $\text{cm}^{-1}$ ; <sup>1</sup>H NMR (500 MHz, CDCl<sub>3</sub>)  $\delta$  7.15 – 7.06 (m, 4H), 7.01-6.97 (m, 4H); <sup>13</sup>C NMR (126 MHz, CDCl<sub>3</sub>)  $\delta$  152.1, 127.7, 126.8, 124.5, 120.1, 117.8; HRMS (ESI) *m/z* for C<sub>12</sub>H<sub>9</sub>OS<sup>+</sup> ([M+H]<sup>+</sup>): 201.0369; found: 201.0372.

### Dibenzo[*b,d*]thiophene<sup>8</sup>

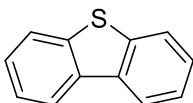

Following the general procedure, the reaction of sulfoxide **1ag** (200.3 mg, 1.0 mmol) with IrCl(CO)(PPh<sub>3</sub>)<sub>2</sub> (3.2 mg, 0.4 mol%), PMHS (444 μL, 2 mmol, 2 equiv), THF (4 mL), gave, after FC (eluent: EtOAc/*n*-hexane = 1: 2), sulfide **2ag** as a white solid (160.1 mg, yield: 87%); M. p. 83 - 85 °C (lit.: M. p. 87 - 89 °C)<sup>8</sup>; IR (film)  $\tilde{\nu}$ : 2922, 1426, 1307, 1230, 1126, 1066, 734 cm<sup>-1</sup>; <sup>1</sup>H NMR (500 MHz, CDCl<sub>3</sub>)  $\delta$  8.13-8.10 (m, 2H), 7.84-7.81 (m, 2H), 7.48 - 7.38 (m, 4H); <sup>13</sup>C NMR (126 MHz, CDCl<sub>3</sub>)  $\delta$  139.4, 135.5, 126.6, 124.3, 122.8, 121.5; HRMS (ESI) *m/z* for C<sub>12</sub>H<sub>9</sub>S<sup>+</sup> ([M+H]<sup>+</sup>): 185.0419; found: 185.0421.

### Allyl(phenyl)sulfane<sup>20</sup>

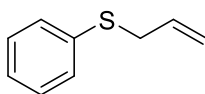

Following the general procedure, the reaction of sulfoxide **1ah** (166.2 mg, 1.0 mmol) with IrCl(CO)(PPh<sub>3</sub>)<sub>2</sub> (3.2 mg, 0.4 mol%), PMHS (555 μL, 2.0 mmol, 2.0 equiv), THF (4 mL) gave, after FC (eluent: PE), sulfide **2ah** as a colorless oil (109.5 mg, yield: 73%); IR (film)  $\tilde{\nu}$ : 3063, 1514, 1479, 1437, 961, 723 cm<sup>-1</sup>; <sup>1</sup>H NMR (400 MHz, Chloroform-*d*)  $\delta$  7.34-7.32 (m, 2H), 7.27-7.24 (m, 2H), 7.19 - 7.13 (m, 1H), 5.86 (m, 1H), 5.16 - 5.02 (m, 2H), 3.53 (dt, *J* = 6.9, 1.3 Hz, 2H); <sup>13</sup>C NMR (101 MHz, Chloroform-*d*)  $\delta$  135.7, 133.5, 129.7, 128.7, 126.1, 117.6, 37.1.

### Methyl (5-(propylthio)-1*H*-benzo[*d*]imidazol-2-yl)carbamate<sup>6</sup>

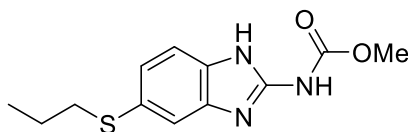

Following the general procedure, the reaction of sulfoxide **1ai** (218.3 mg, 1.0 mmol) with IrCl(CO)(PPh<sub>3</sub>)<sub>2</sub> (3.2 mg, 0.4 mol%), PMHS (555 μL, 2.5 mmol, 2.5 equiv), THF

(4 mL), 80 °C, 12 h gave, after FC (eluent: EtOAc), sulfide **2ai** as a white solid (196.3 mg, yield: 74%); M. p. 201 - 203 °C (lit.: M. p. 206 - 208 °C)<sup>6</sup>; IR (film)  $\tilde{\nu}$ : 3323, 1713, 2956, 1633, 1443, 1326, 1195, 1269, 1096, 958, 760  $\text{cm}^{-1}$ ; <sup>1</sup>H NMR (400 MHz, DMSO-*d*<sub>6</sub>)  $\delta$  7.44 (d, *J* = 1.7 Hz, 1H), 7.35 (d, *J* = 8.2 Hz, 1H), 7.12-7.10 (m, 1H), 3.77 (s, 3H), 3.34 (s, 1H), 2.86 (t, *J* = 7.1 Hz, 2H), 2.52-2.50 (m, 1H), 1.59-1.50 (m, 2H), 0.95 (t, *J* = 7.3 Hz, 3H); <sup>13</sup>C NMR (101 MHz, DMSO-*d*<sub>6</sub>)  $\delta$  154.8, 147.8, 126.8, 124.0, 115.7, 114.1, 52.5, 36.7, 22.1, 13.1; HRMS (ESI) *m/z* for C<sub>12</sub>H<sub>16</sub>N<sub>3</sub>O<sub>2</sub>S<sup>+</sup> ([M+H]<sup>+</sup>): 266.0958; found: 266.0957.

**5-Methoxy-2-(((4-methoxy-3,5-dimethylpyridin-2-yl)methyl)thio)-1H-benzo[*d*]imidazole<sup>6</sup>**

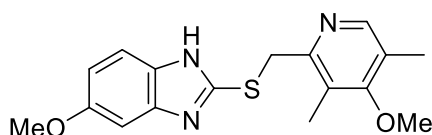

Following the general procedure, the reaction of sulfoxide **1aj** (345.4 mg, 1.0 mmol) with IrCl(CO)(PPh<sub>3</sub>)<sub>2</sub> (3.2 mg, 0.4 mol%), PMHS (555  $\mu\text{L}$ , 2.5 mmol, 2.5 equiv), THF (4 mL), 80 °C, 12 h gave, after FC (eluent: EtOAc/*n*-hexane = 2: 1), sulfide **2aj** as a colorless oil (273.2 mg, yield: 83%)<sup>6</sup>; IR (film)  $\tilde{\nu}$ : 2932, 1567, 1265, 1198, 1156, 1073, 804  $\text{cm}^{-1}$ ; <sup>1</sup>H NMR (500 MHz, CDCl<sub>3</sub>)  $\delta$  8.26 (s, 1H), 7.41 (d, *J* = 8.7 Hz, 1H), 7.03 (d, *J* = 2.4 Hz, 1H), 6.83-6.81 (m, 1H), 4.37 (s, 2H), 3.84 (s, 3H), 3.78 (s, 3H), 2.31 (s, 3H), 2.27 (s, 3H); <sup>13</sup>C NMR (126 MHz, CDCl<sub>3</sub>)  $\delta$  165.0, 155.9, 155.8, 150.6, 148.3, 126.4, 125.5, 111.0, 60.0, 55.8, 35.0, 13.4, 11.2; HRMS (ESI) *m/z* for C<sub>17</sub>H<sub>20</sub>N<sub>3</sub>O<sub>2</sub>S<sup>+</sup> ([M+H]<sup>+</sup>): 330.1271; found: 330.1266.

**2-(((3-Methyl-4-(2,2,2-trifluoroethoxy)pyridin-2-yl)methyl)thio)-1H-benzo[*d*]imidazole<sup>6</sup>**

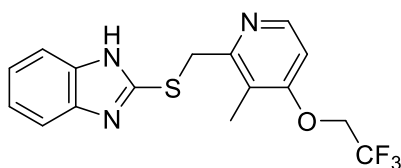

Following the general procedure, the reaction of sulfoxide **1ak** (369.4 mg, 1.0 mmol) with IrCl(CO)(PPh<sub>3</sub>)<sub>2</sub> (3.2 mg, 0.4 mol%), PMHS (555 μL, 2.5 mmol, 2.5 equiv), THF:CH<sub>2</sub>Cl<sub>2</sub> = 3: 1 (4 mL), 80 °C, 12 h gave, after FC (eluent: EtOAc/*n*-hexane = 1: 2), sulfide **2ak** as a white solid (250.9 mg, yield: 71%); M. p. 154 - 156 °C (lit.: M. p. 150 - 152 °C)<sup>6</sup>; IR (film)  $\tilde{\nu}$ : 3326, 3053, 1576, 1408, 1254, 1199, 1160, 974, 760, 745 cm<sup>-1</sup>; <sup>1</sup>H NMR (500 MHz, CDCl<sub>3</sub>)  $\delta$  8.40 (d, *J* = 5.7 Hz, 1H), 7.60 – 7.46 (m, 2H), 7.20-7.17 (m, 2H), 6.71 (d, *J* = 5.7 Hz, 1H), 4.45 – 4.39 (m, 4H), 2.31 (s, 3H); <sup>13</sup>C NMR (126 MHz, CDCl<sub>3</sub>)  $\delta$  162.4, 157.6, 151.2, 147.4, 122.8 (q, *J*<sub>C-F</sub> = 277.9 Hz), 122.0, 121.7, 105.9, 65.5 (q, *J*<sub>C-F</sub> = 36.5 Hz), 34.8, 10.6; <sup>19</sup>F NMR ((376 MHz, Chloroform-*d*)  $\delta$  - 73.73; HRMS (ESI) *m/z* for C<sub>16</sub>H<sub>15</sub>F<sub>3</sub>N<sub>3</sub>OS<sup>+</sup>([M+H]<sup>+</sup>): 354.0882; found: 354.0877.

#### 4. Gram-scale reactions

##### 4.1 Gram-scale reduction of sulfoxide **1a**

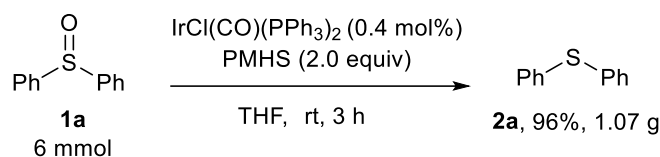

To a flame-dried Schlenk tube were added sulfoxide **1a** (1.21 g, 6 mmol), IrCl(CO)(PPh<sub>3</sub>)<sub>2</sub> (19.2 mg, 0.4 mol%) and THF (16 mL) under N<sub>2</sub> atmosphere at room temperature. After being stirred at room temperature for 5 min, PMHS (2.7 mL, 12.0 mmol) was added, and the resulting mixture was stirred at room temperature for 3 h. The resulting mixture was filtered through a short pad of Celite eluting with ethyl acetate (120 mL), the residue was concentrated under reduced pressure. The residue was purified by column chromatography on silica gel eluting with petroleum ether to give sulfide **2a** in 96% yield (1.07 g) as a pale-yellow oil.

##### 4.2 Gram-scale reduction of sulfoxide **1w**

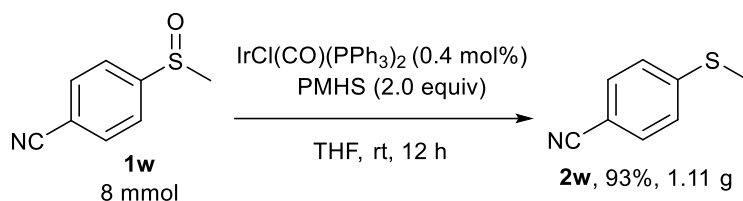

To a flame-dried round bottle flask were added sulfoxide **1w** (1.32 g, 8 mmol),  $\text{IrCl(CO)(PPh}_3)_2$  (25.6 mg, 0.4 mol%) and THF (16 mL) under  $\text{N}_2$  atmosphere at room temperature. After being stirred at room temperature for 5 min, PMHS (3.6 mL, 16.0 mmol) was added, and the resulting mixture was stirred at room temperature for 12 h. The resulting mixture was filtered through a short pad of Celite eluting with ethyl acetate (160 mL), the residue was concentrated under reduced pressure. The residue was purified by column chromatography on silica gel eluting with petroleum ether to give sulfide **2w** in 93% yield (1.11 g) as a white solid.

#### 4.3 Gram-scale reduction of sulfoxide **1a** in 2-MeTHF

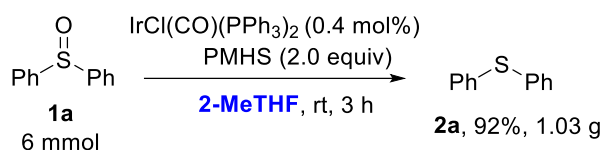

To a flame-dried round bottle flask were added sulfoxide **1a** (1.21 g, 6 mmol),  $\text{IrCl(CO)(PPh}_3)_2$  (19.2 mg, 0.4 mol%) and 2-MeTHF (12 mL) under  $\text{N}_2$  atmosphere at room temperature. After being stirred at room temperature for 5 min, PMHS (2.7 mL, 12.0 mmol) was added, and the resulting mixture was stirred at room temperature for 3 h. The resulting mixture was filtered through a short pad of Celite eluting with ethyl acetate (120 mL), the residue was concentrated under reduced pressure. The residue was purified by column chromatography on silica gel eluting with petroleum ether to give sulfide **2a** in 92% yield (1.03 g) as a pale-yellow oil.

#### 4.3 Gram-scale reduction of sulfoxide **1t** in 2-MeTHF

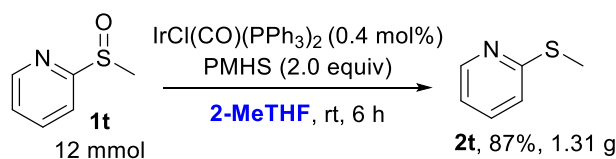

To a flame-dried round bottle flask were added sulfoxide **1t** (1.69 g, 12 mmol), IrCl(CO)(PPh<sub>3</sub>)<sub>2</sub> (38.4 mg, 0.4 mol%) and 2-MeTHF (24 mL) under N<sub>2</sub> atmosphere at room temperature. After being stirred at room temperature for 5 min, PMHS (5.3 mL, 24.0 mmol) was added, and the resulting mixture was stirred at room temperature for 6 h. The resulting mixture was filtered through a short pad of Celite eluting with ethyl acetate (200 mL), the residue was concentrated under reduced pressure. The residue was purified by column chromatography on silica gel eluting with petroleum ether to give sulfide **2t** in 87% yield (1.31 g) as a pale-yellow oil.

#### 4.4 Gram-scale reaction at 0.01 mol % catalyst loading

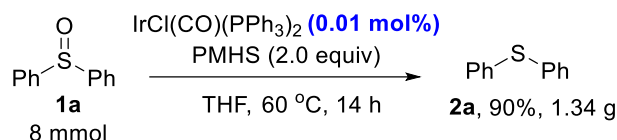

To a flame-dried round bottle flask equipped with a stir bar were added sulfoxide **1a** (1.62 g, 8 mmol), IrCl(CO)(PPh<sub>3</sub>)<sub>2</sub> (0.64 mg, 0.01 mol%) and THF (16 mL) under N<sub>2</sub> atmosphere at room temperature. After being stirred at room temperature for 5 min, PMHS (3.6 mL, 16.0 mmol) was added, and the resulting mixture was stirred at 60 °C for 14 h. After cooling down to room temperature, the resulting mixture was filtered through a short pad of Celite eluting with ethyl acetate (160 mL), the residue was concentrated under reduced pressure. The residue was purified by column chromatography on silica gel eluting with petroleum ether to give sulfide **2a** in 90% yield (1.34 g) as a pale-yellow oil.

#### 5. Gram-scale reaction at 0.001 mol % catalyst loading

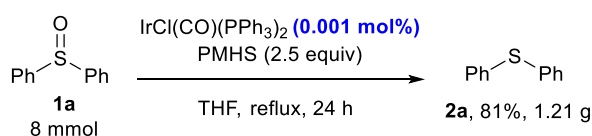

Preparation of highly diluted IrCl(CO)(PPh<sub>3</sub>)<sub>2</sub>/THF solution: 7.8 mg (0.01 mmol) of IrCl(CO)(PPh<sub>3</sub>)<sub>2</sub> was added to 100 mL of THF, and 1.0 mL of the resultant solution was further diluted to 0.00001 mmol/ mL, from which 1.0 mL was used for the reaction.

To a flame-dried round bottle flask equipped with a stir bar were added sulfoxide **1a** (1.62 g, 8 mmol), IrCl(CO)(PPh<sub>3</sub>)<sub>2</sub>/ THF solution (1.0 mL of the abovementioned solution, 0.001 mol %), and THF (16 mL) under N<sub>2</sub> atmosphere at room temperature. After being stirred at room temperature for 5 min, PMHS (3.6 mL, 16.0 mmol) was added, and the resulting mixture was stirred at reflux for 24 hours. After cooling down to room temperature, the resulting mixture was filtered through a short pad of Celite eluting with ethyl acetate (160 mL), the residue was concentrated under reduced pressure. The residue was purified by column chromatography on silica gel eluting with petroleum ether to give sulfide **2a** in 84% yield (1.25 g) as a pale-yellow oil.

#### 6. Gram-scale reaction(32 mmol) at 0.01 mol % catalyst loading

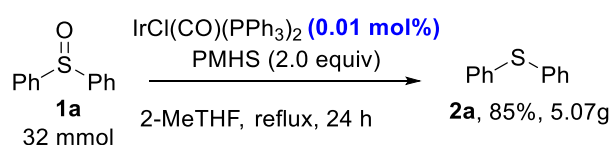

To a flame-dried round bottle flask equipped with a stir bar were added sulfoxide **1a** (6.47 g, 32 mmol), IrCl(CO)(PPh<sub>3</sub>)<sub>2</sub> (2.5 mg, 0.01 mol%) and 2-MeTHF (60 mL) under N<sub>2</sub> atmosphere at room temperature. After being stirred at room temperature for 5 min, PMHS (28.2 mL, 64.0 mmol) was added, and the resulting mixture was stirred at reflux for 24 hours. After cooling down to room temperature, the resulting mixture was filtered through a short pad of Celite eluting with ethyl acetate (160 mL), the residue was concentrated under reduced pressure. The residue was purified by column chromatography on silica gel eluting with petroleum ether to give sulfide **2a** in 85% yield (5.07 g) as a pale-yellow oil.

#### 6. Reference

- [1] W. -X. Li, B.-W. Yang, X. Ying, Z.-W. Zhang, X.-Q. Chu, X.-C. Zhou, M.-T. Ma, Z.-L. Shen, *J. Org. Chem.* **2022**, *87*, 11899-11908.
- [2] X.-J. Li, Y. Sun, X. Huang, L. Zhang, L.-C. Kong, B. Peng, *Org. Lett.* **2017**, *19*, 838-841.
- [3] F. Secci, A. Frongia, P. P. Piras, *Tetrahedron Lett.* **2014**, *55*, 603-605.
- [4] N. Sakai, R. Shimada, Y. Ogiwara, *Asian J. Org. Chem.* **2021**, *10*, 845-850.
- [5] A. K. Clarke, A. Parkin, R. Taylor, W. P. Unsworth, J. A. Rossi-Ashton, *ACS Catal.* **2020**, *10*, 5814-5820
- [6] Y. Xiao, X.-L. Pu, F.-Q. Lu, Y.-M. Wang, Y.-N. Xu, H. Zhang, Liu, Y.-J, *Arabian J. Chem.* **2022**, *15*, 103896.
- [7] L. Zhang, X.-J. Li, Y. Sun, W.-Z. Zhao, F. Luo, X. Huang, L.-H. Y. Lin, Ying; B. Peng, *Org. Biomol. Chem.* **2017**, *15*, 7181-7189
- [8] Z.-S. Kong, C. Pan, M. Li, L.-R. Wen, W. Guo, *Green Chem.*, **2021**, *23*, 2773-2777.
- [9] J. Asha, I. Zafar and D. Saroj, *ChemistrySelect*, **2022**, *7*, e202202924.
- [10] B. Argha, H. Hiromu, Y. Taiga, T. Hayato, M. Kazushi, *Chem. Lett.* **2019**, *48*, 888-890.
- [11] B. Zhang, Z.-G. Fan, Z.-Q. Guo, C.-J. Xi, *J. Org. Chem.* **2019**, *84*, 8661-8667.
- [12] S. K. Sinha, S. Panja, J. Grover, P. S. Hazra, S. Pandit, Y. Bairagi, X.-l. Zhang, D. Maiti, *J. Am. Chem. Soc.* **2022**, *144*, 12032-12042
- [13] G.-D. Zhang, C.-Y. Zhang, Y. Tian, F. Chen, *Org. Lett.* **2023**, *25*, 917-922.
- [14] A.-G. P, M.-M. C, G.-S. D, *Chem. Eur. J.*, **2020**, *26*, 10348-10354
- [15] T. C. Pijper, J. Robertus, W. R. Browne, B. L. Feringa, *Org. Biomol. Chem.* **2015**, *13*, 265-268.
- [16] M. Thérien, J. Y. Gauthier, Y. Leblanc, S. Léger, H. Perrier, P. Prasit, Z.-Y Wang, *Synthesis* **2001**, *12*, 1778 - 1779.
- [17] Z. AnAe, J. Marjan, *Green Chem. Lett. Rev.* **2020**, *13*, 341-348.
- [18] X.-D. Jin, and R. P. Davies, *Catalysis Science & Technology*, **2017**, *7*, 2110-2117.
- [19] Y.-R. Jiang, W.-J, Zhu, J.-W. Huang, F. Luo, X.-B. Chen, C. Fang, X. Chen, S.-H. Liu, Y.-W. Hu, S.-L. Zhang, *Org. Chem. Front.* **2024**, *11*, 12-20.



- [20] C. K. Spyropoulou, E. Skolia, D. F. Flesariu, G. A. Zissimou, et al, *Advanced Synthesis & Catalysis*, **2023**, 36, 2643-2650.

## 7. NMR spectra of products

**Fig. 1.**  $^1\text{H}$  NMR (500 MHz,  $\text{CDCl}_3$ ) and  $^{13}\text{C}$  NMR (126 MHz,  $\text{CDCl}_3$ ) spectra of **2a**

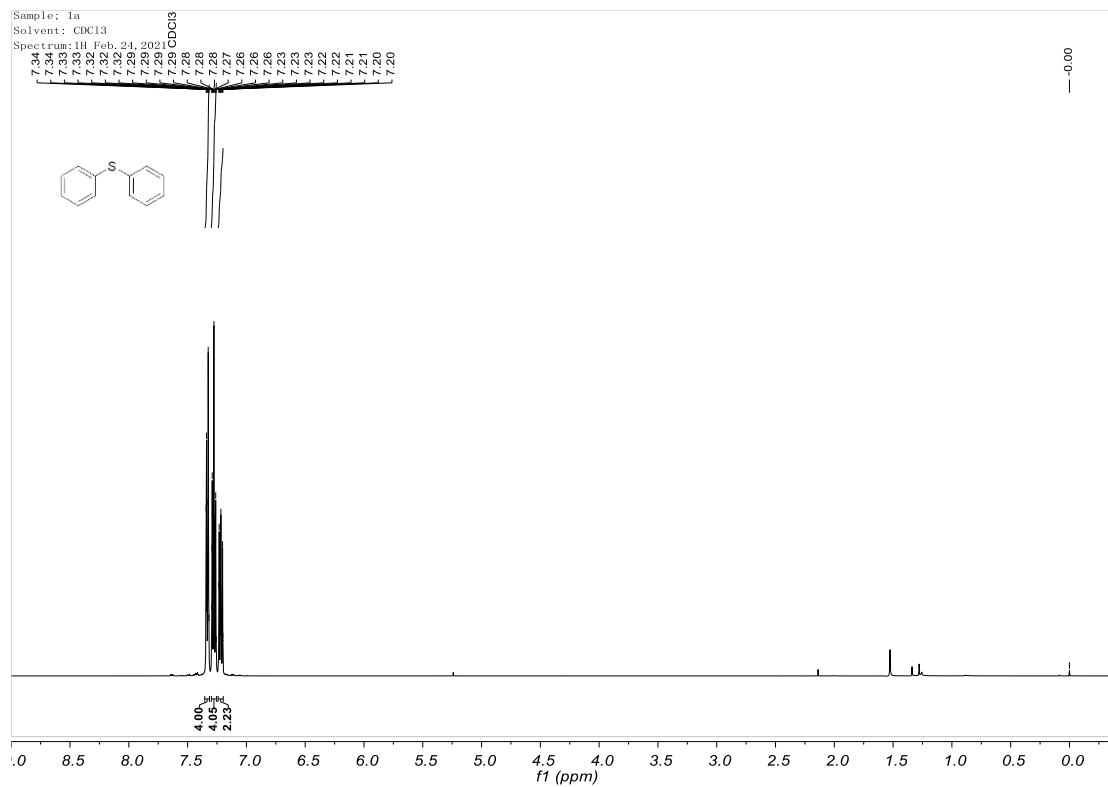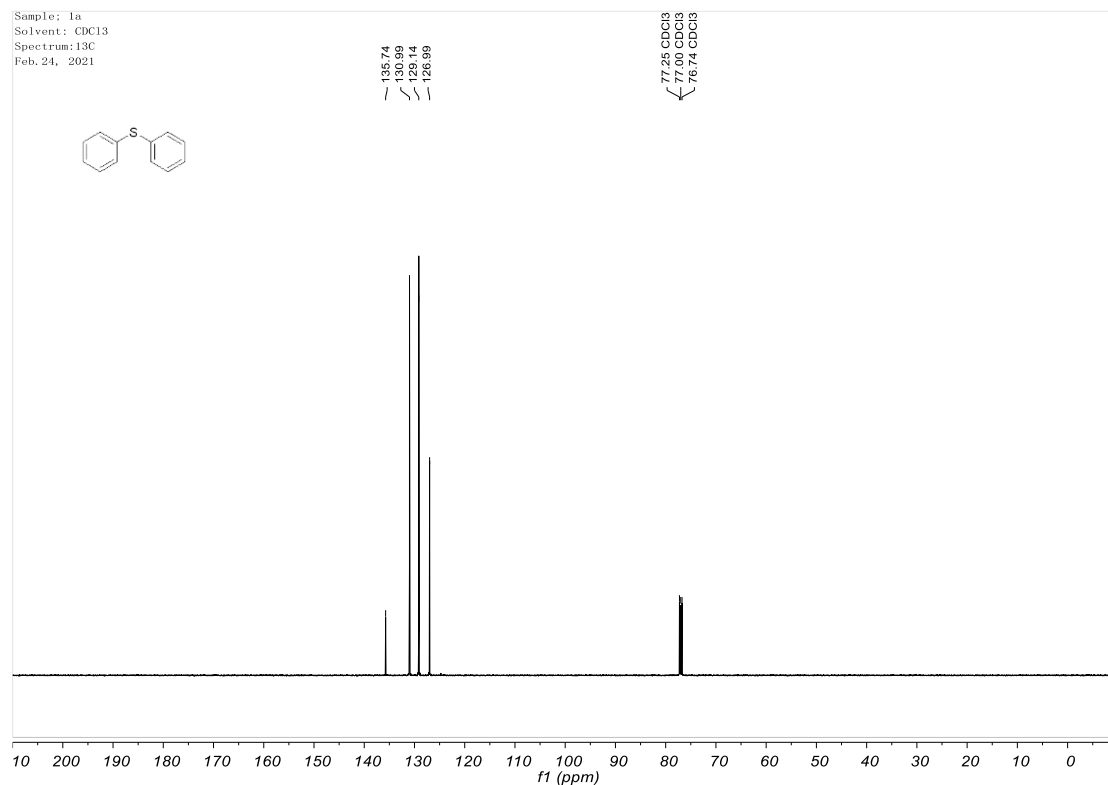

**Fig. 2.  $^1\text{H}$  NMR (500 MHz,  $\text{CDCl}_3$ ) and  $^{13}\text{C}$  NMR (126 MHz,  $\text{CDCl}_3$ ) spectra of **2b****

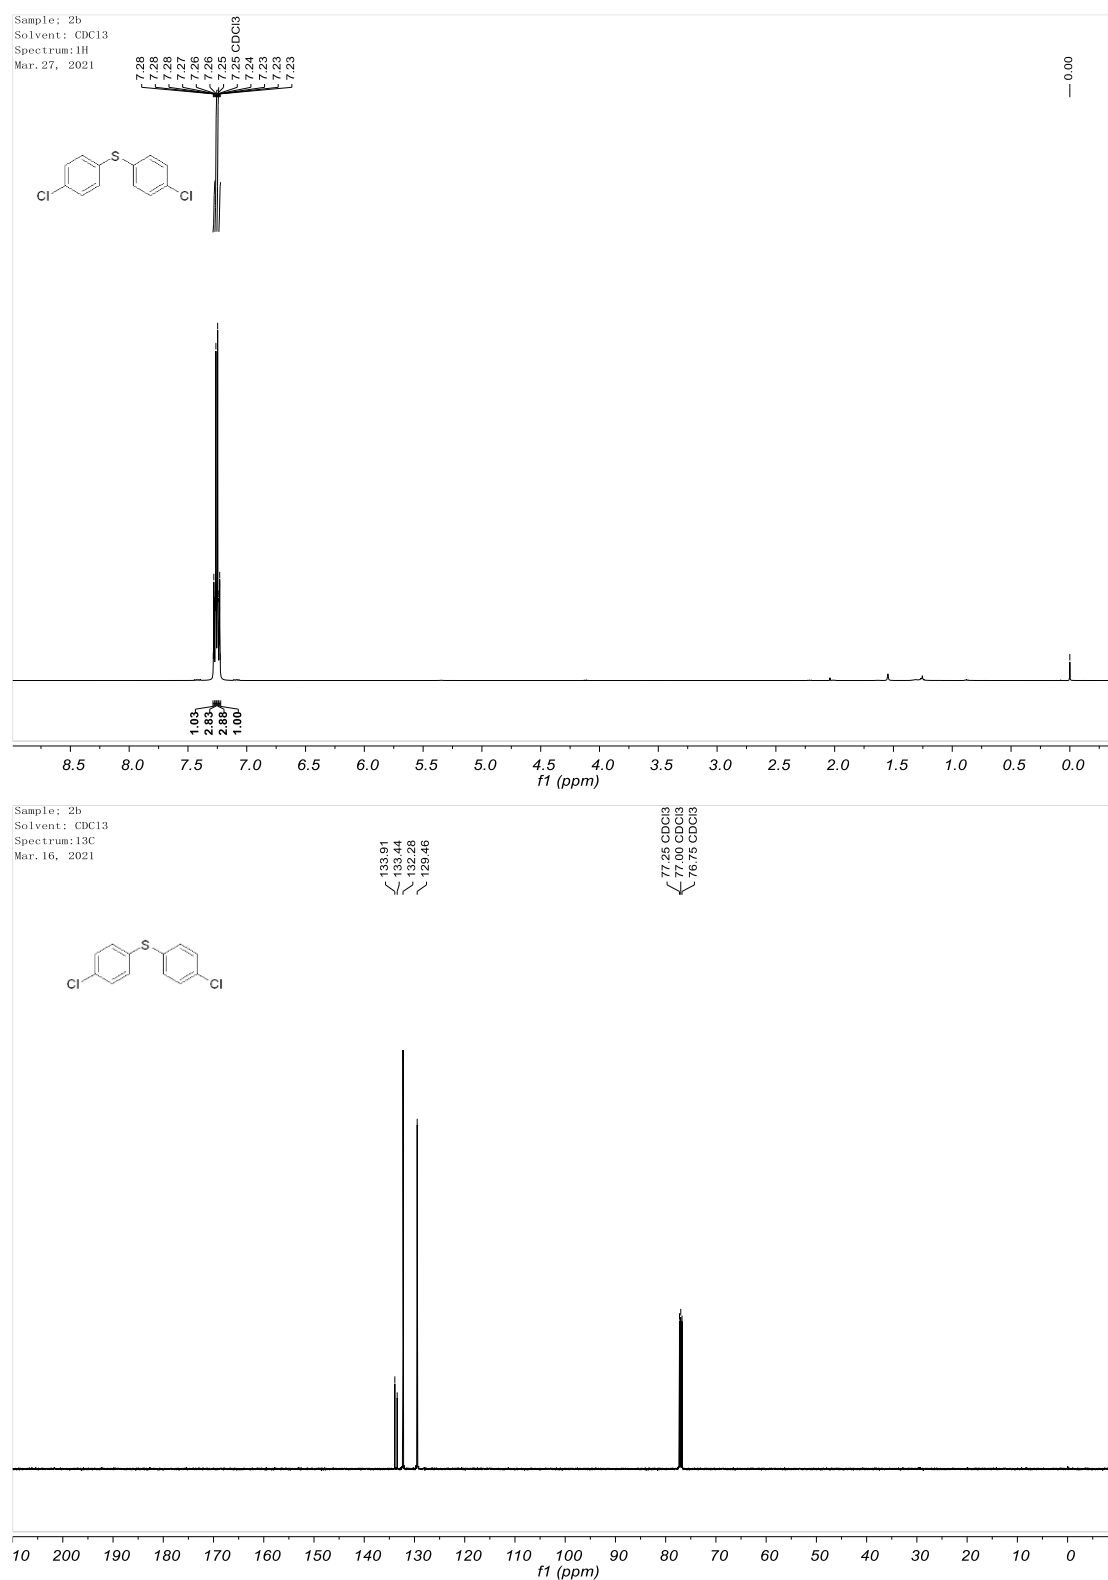

**Fig. 3.**  $^1\text{H}$  NMR (500 MHz,  $\text{CDCl}_3$ ) and  $^{13}\text{C}$  NMR (126 MHz,  $\text{CDCl}_3$ ) spectra of **2c**

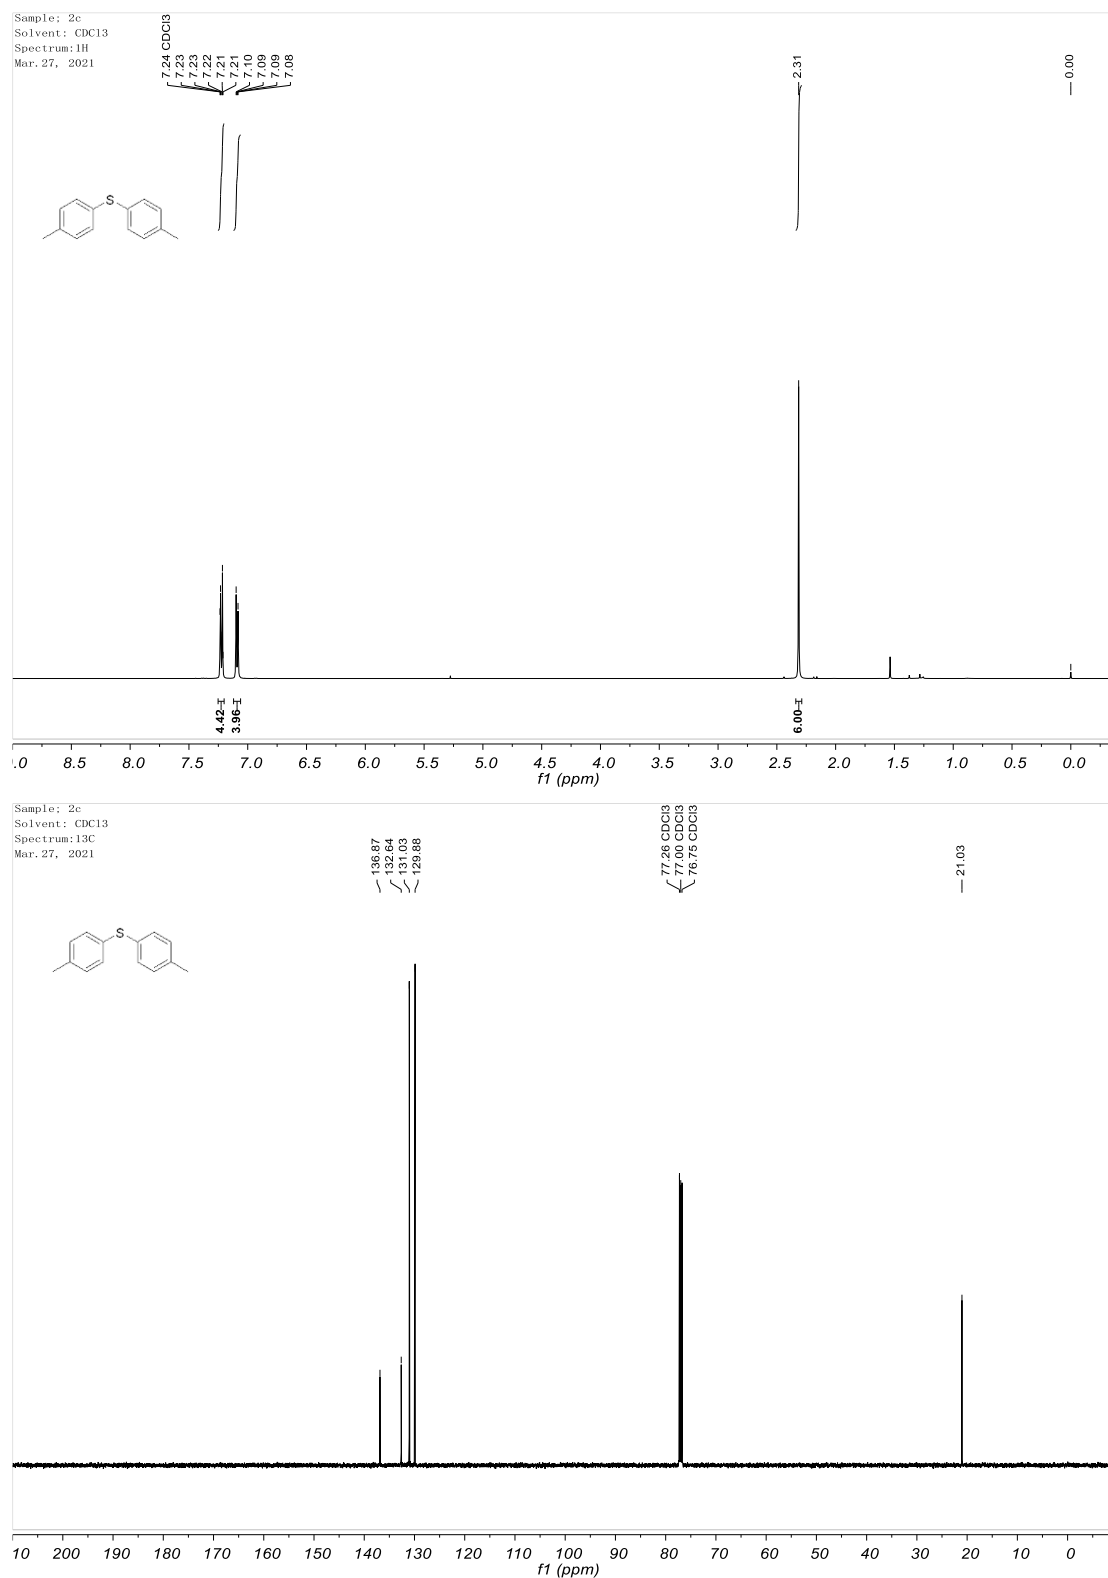

**Fig. 4. <sup>1</sup>H NMR (500 MHz, CDCl<sub>3</sub>) and <sup>13</sup>C NMR (126 MHz, CDCl<sub>3</sub>) spectra of 2d**

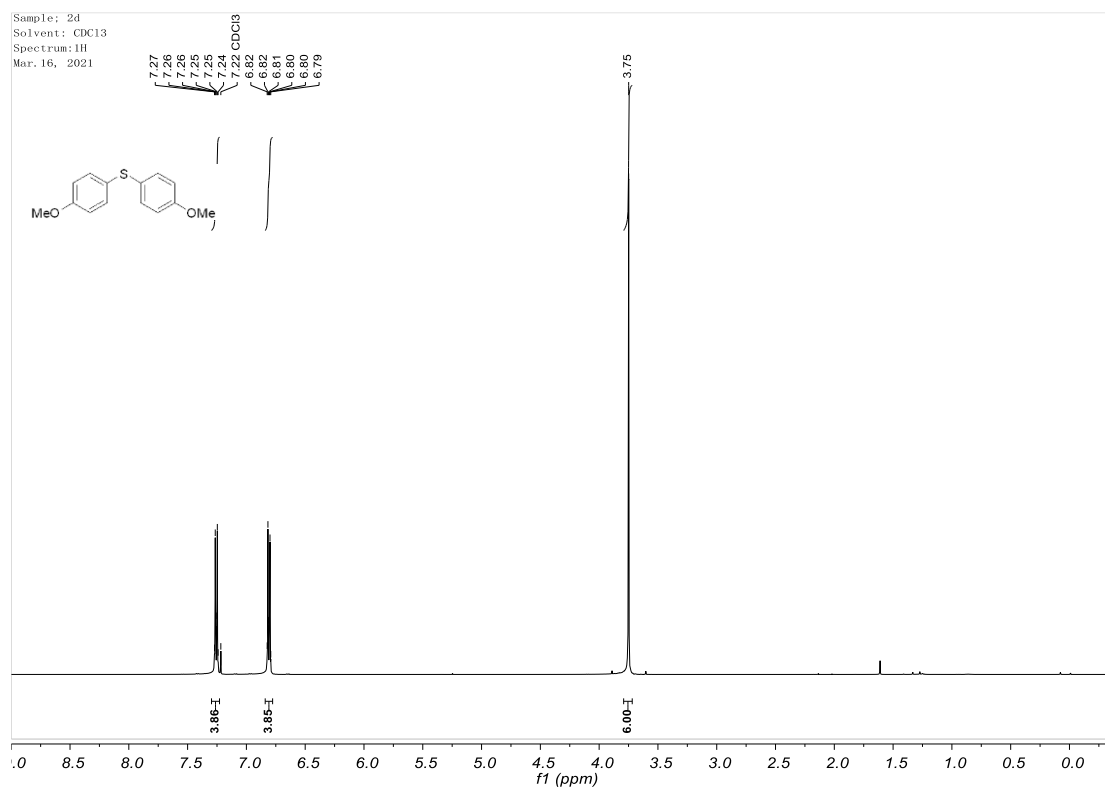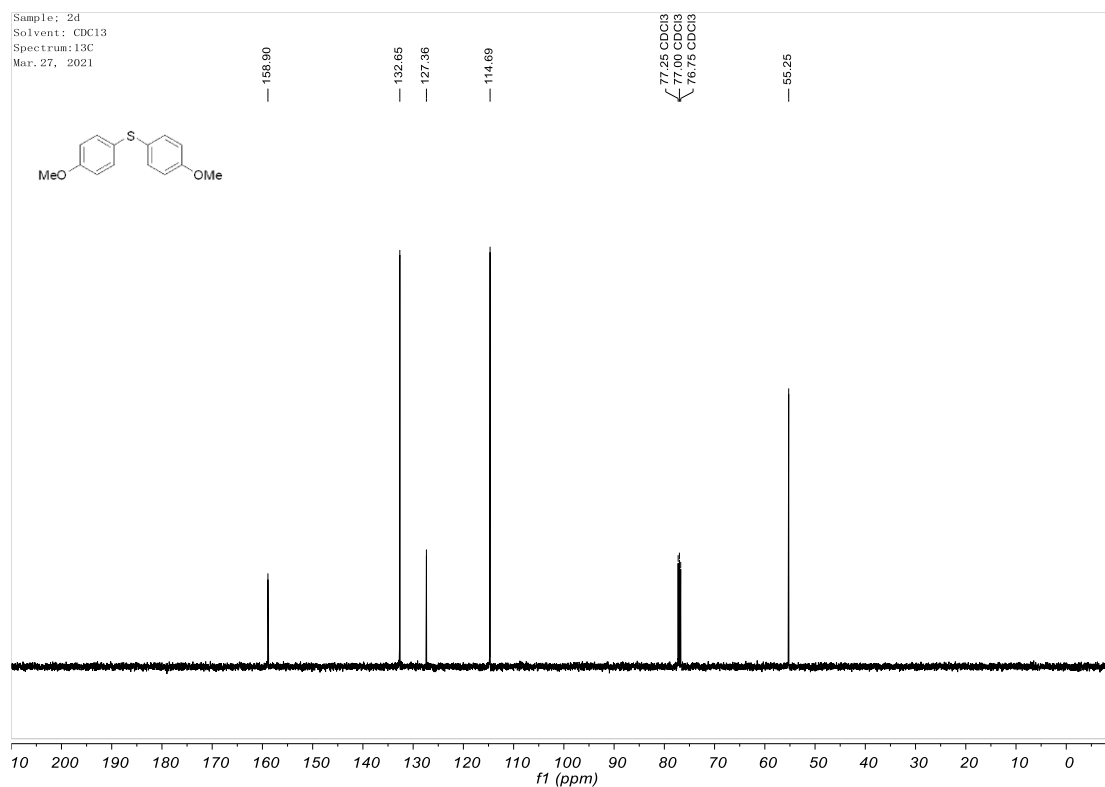

**Fig. 5.  $^1\text{H}$  NMR (500 MHz,  $\text{CDCl}_3$ ) and  $^{13}\text{C}$  NMR (126 MHz,  $\text{CDCl}_3$ ) spectra of **2e****

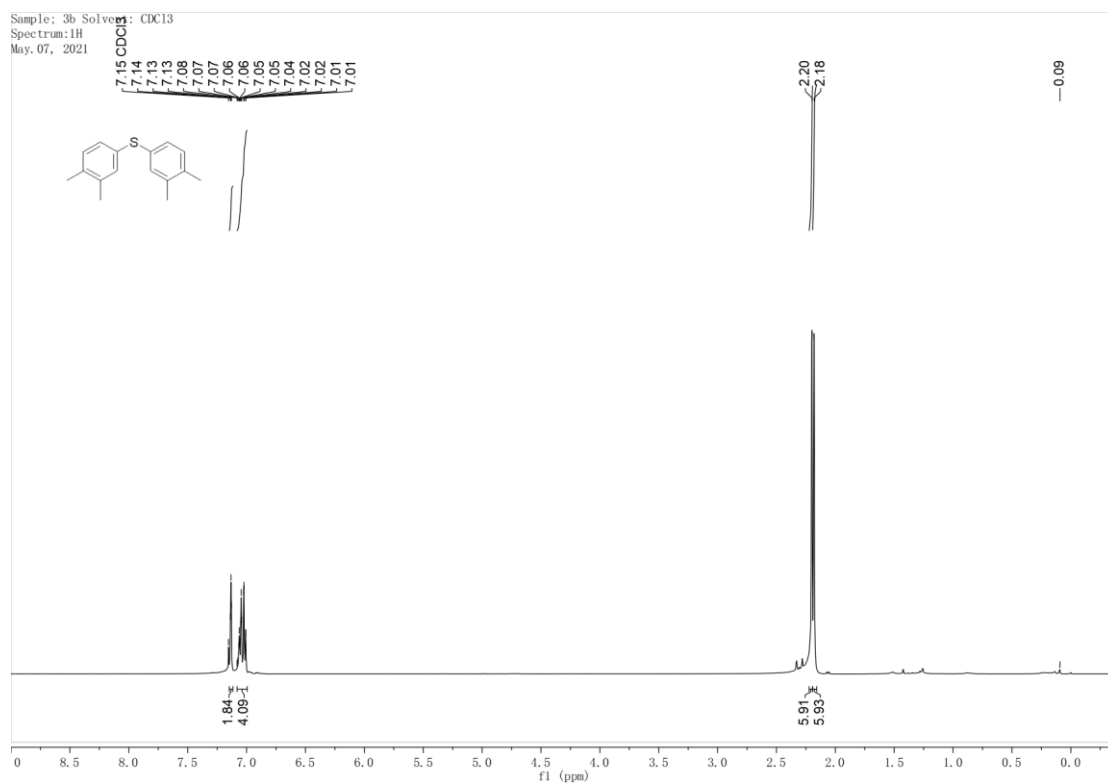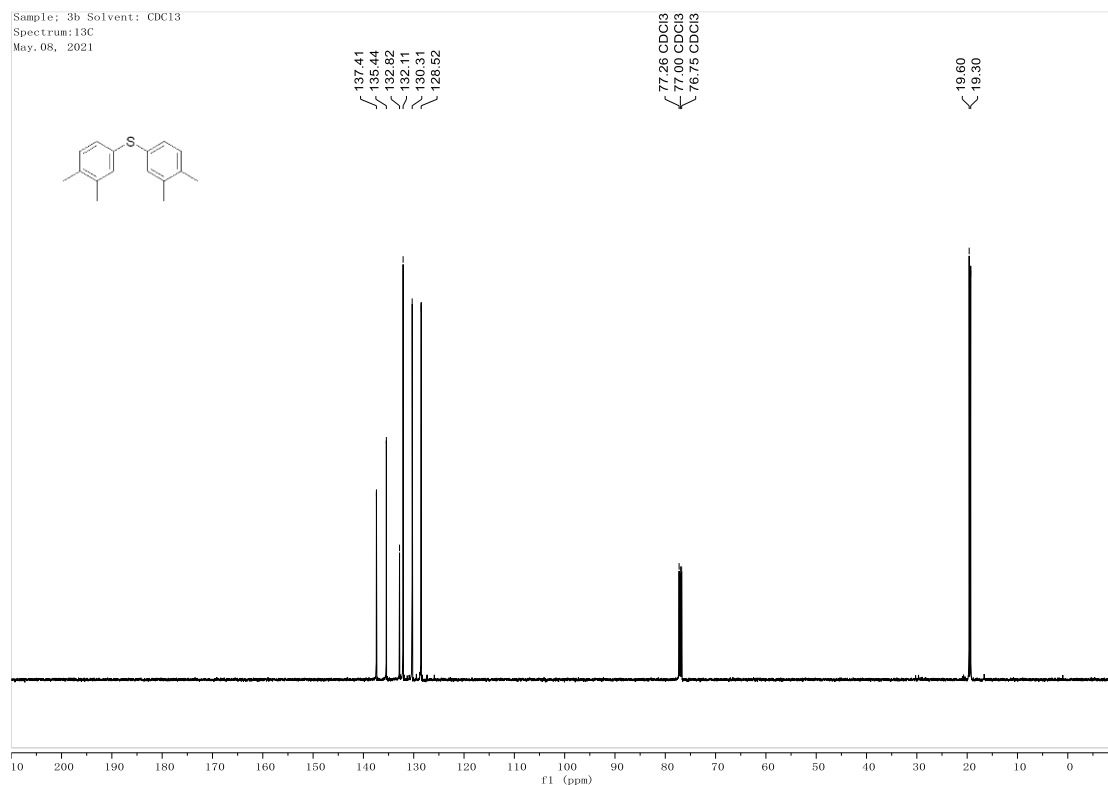

**Fig. 6.**  $^1\text{H}$  NMR (500 MHz,  $\text{CDCl}_3$ ) and  $^{13}\text{C}$  NMR (126 MHz,  $\text{CDCl}_3$ ) spectra of **2f**

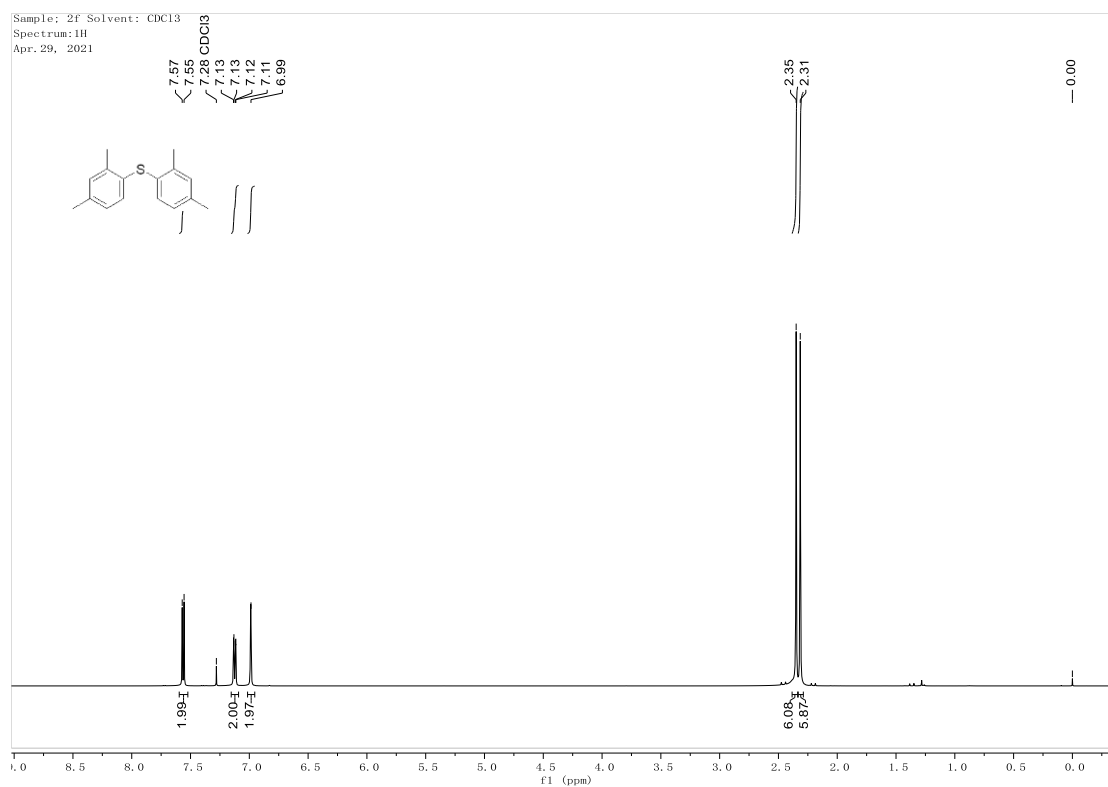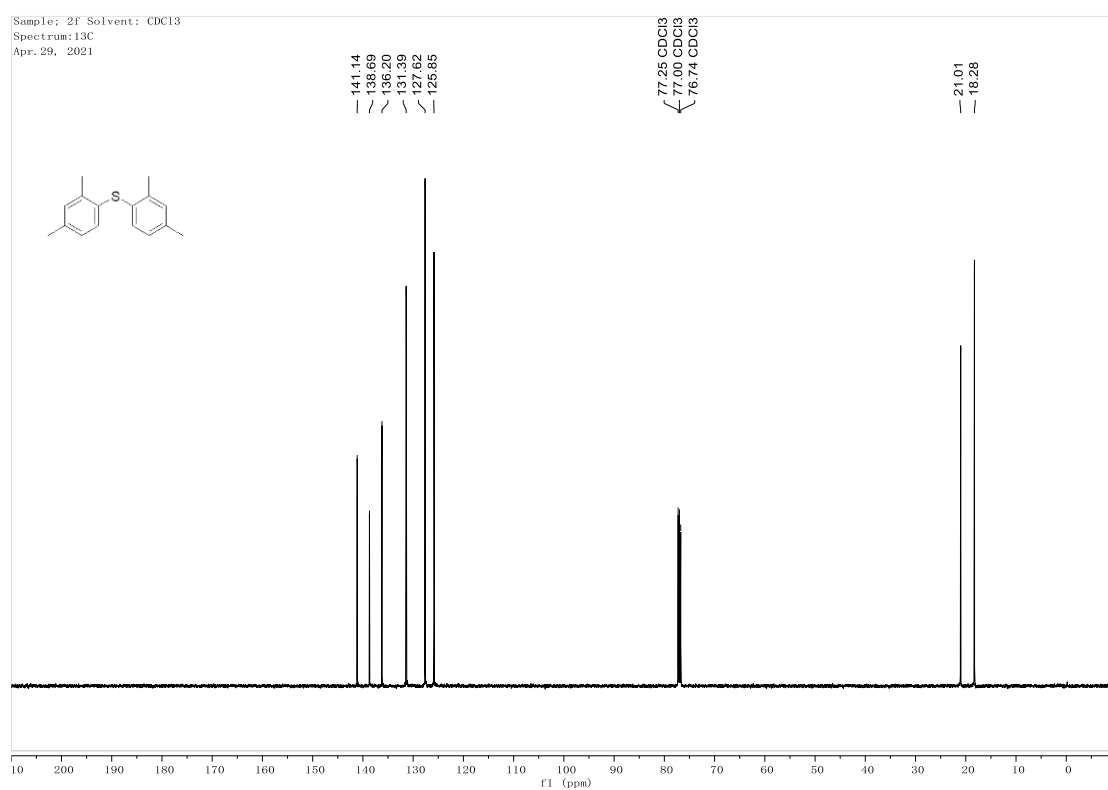

**Fig. 7.  $^1\text{H}$  NMR (500 MHz,  $\text{CDCl}_3$ ) and  $^{13}\text{C}$  NMR (126 MHz,  $\text{CDCl}_3$ ) spectra of **2g****

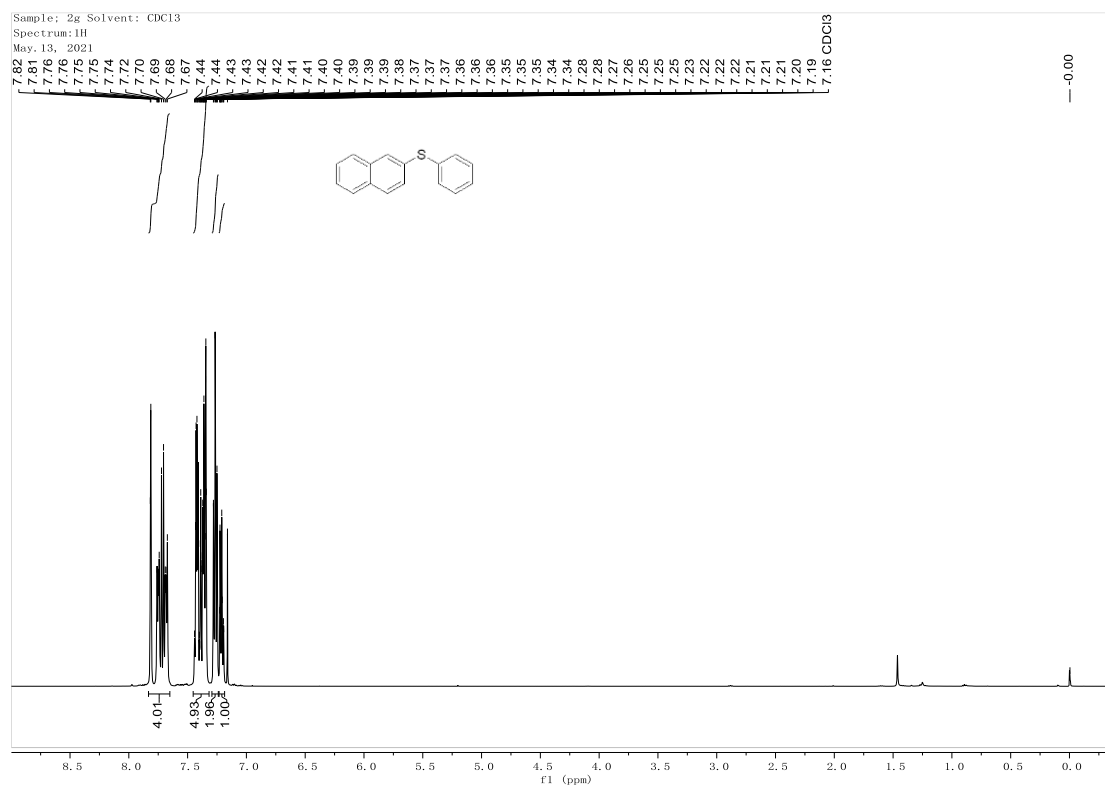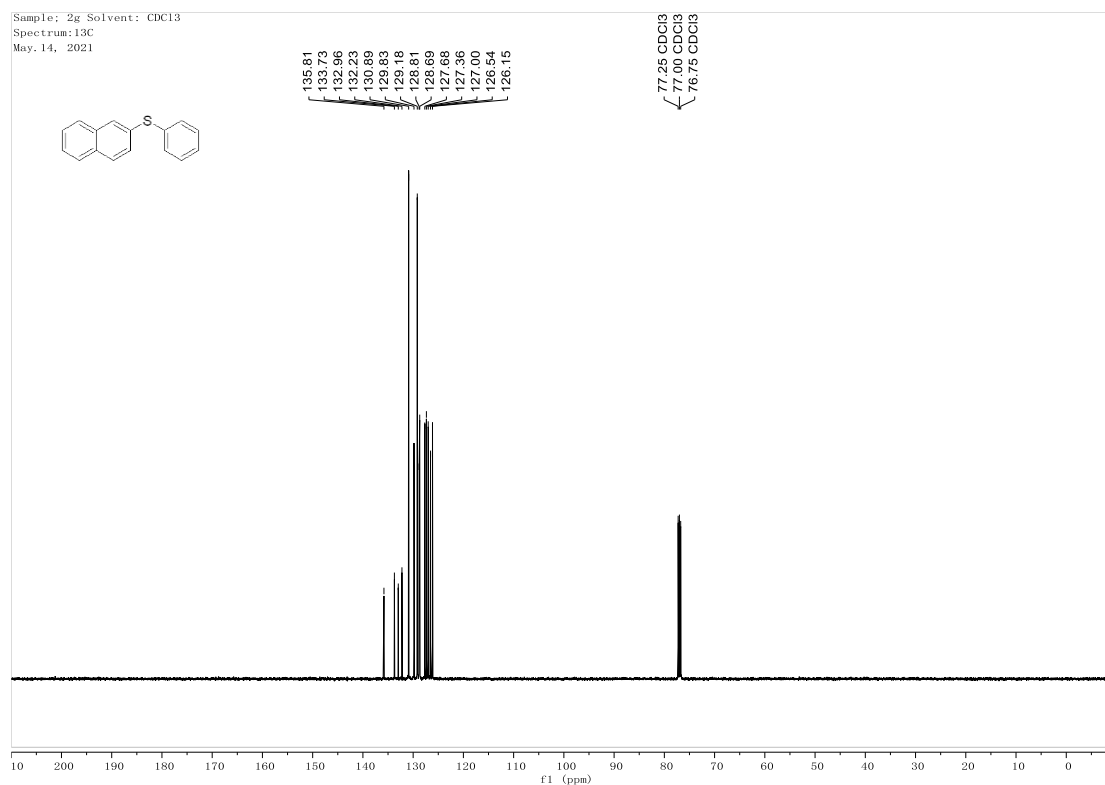



**Fig. 8. <sup>1</sup>H NMR (400 MHz, CDCl<sub>3</sub>) and <sup>13</sup>C NMR (100 MHz, CDCl<sub>3</sub>) spectra of 2h**

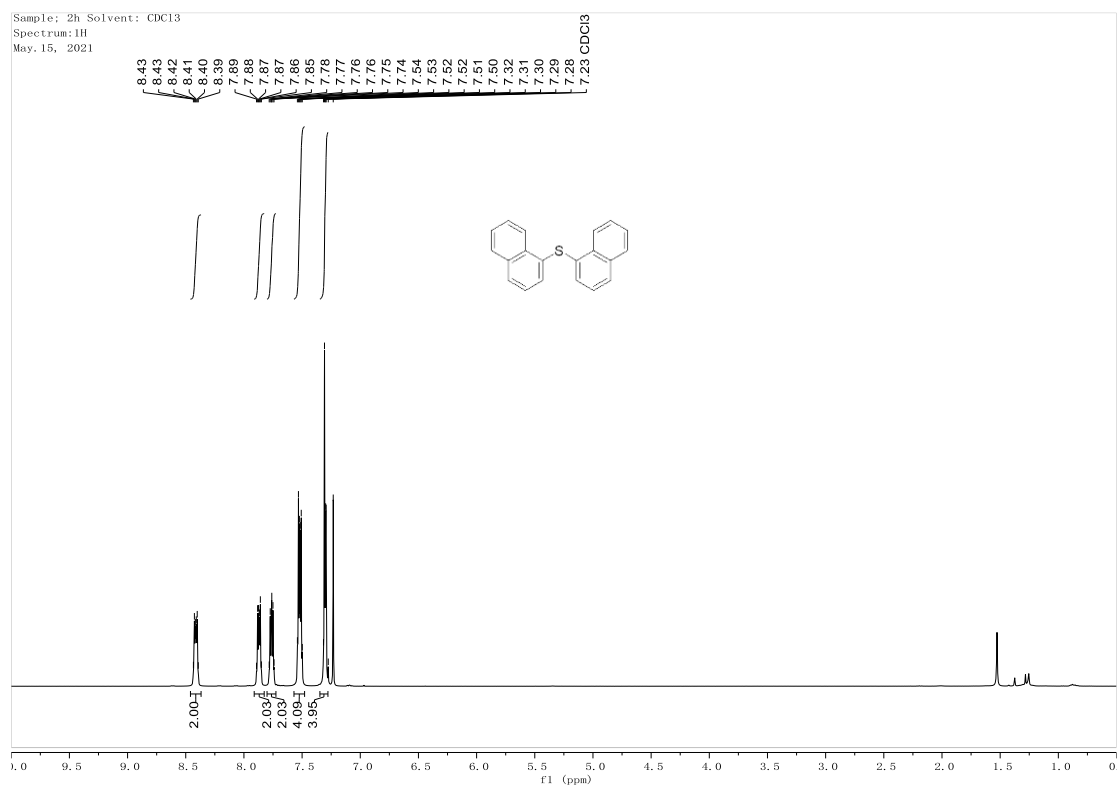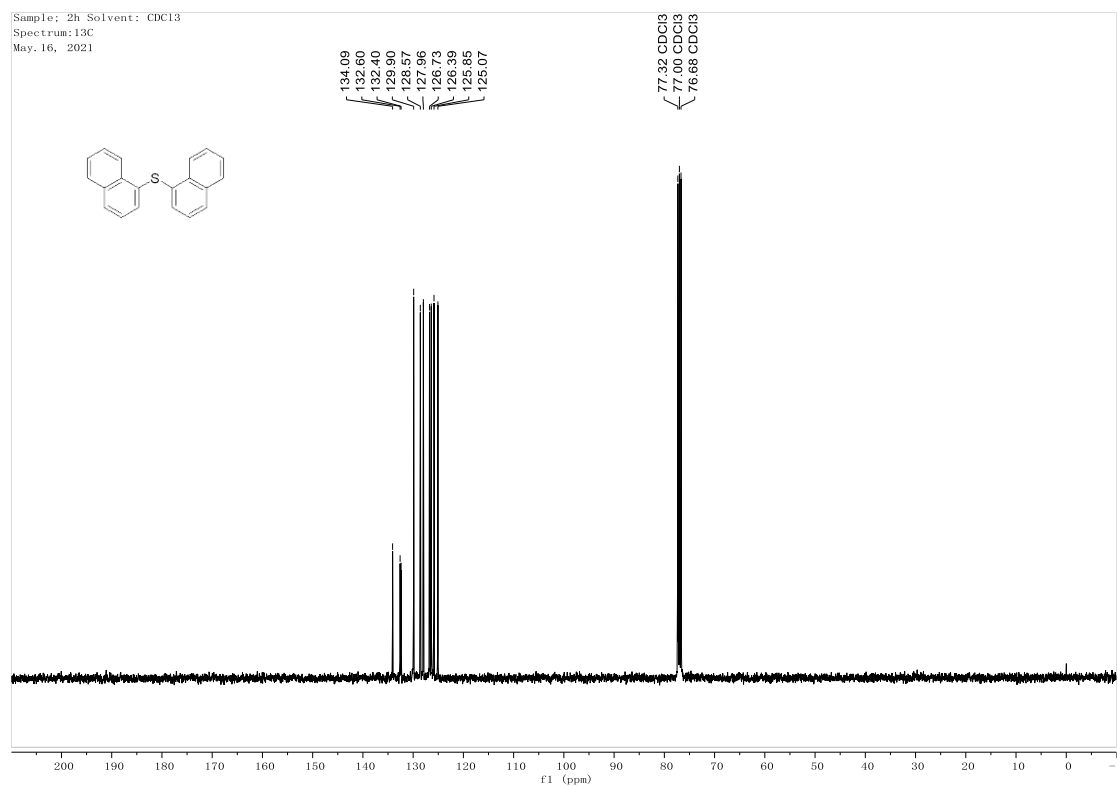

**Fig. 9.**  $^1\text{H}$  NMR (500 MHz,  $\text{CDCl}_3$ ) and  $^{13}\text{C}$  NMR (126 MHz,  $\text{CDCl}_3$ ) spectra of **2i**

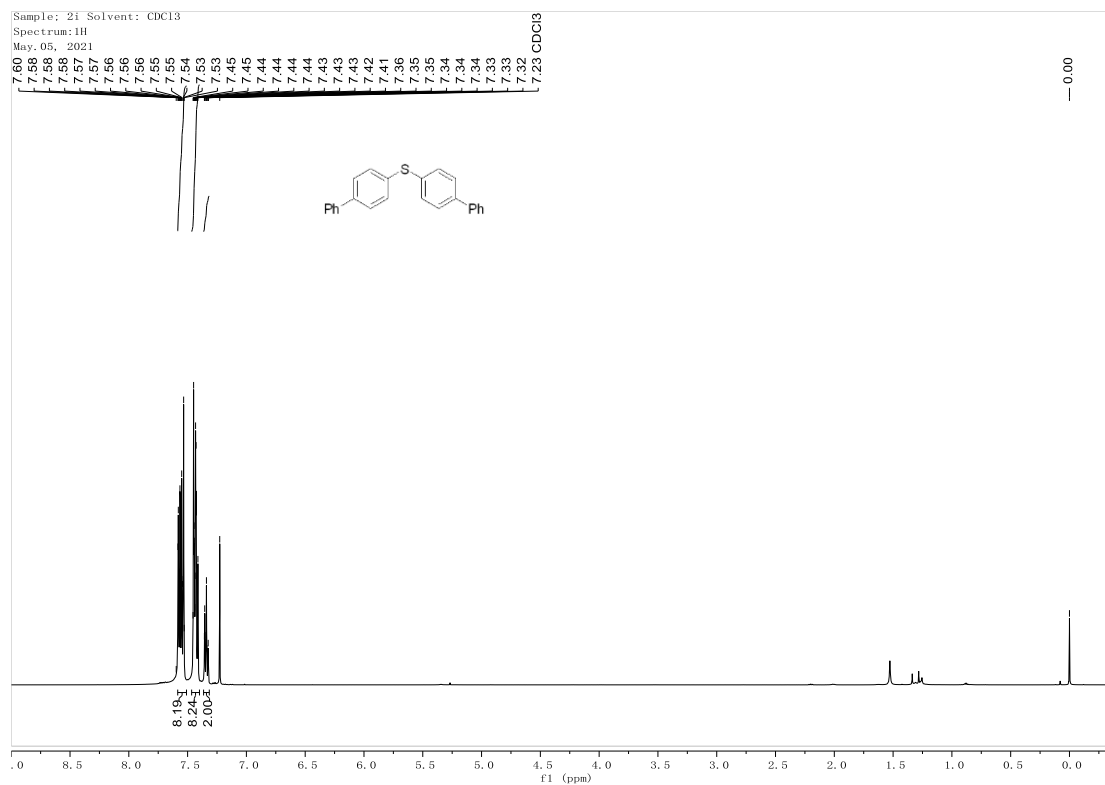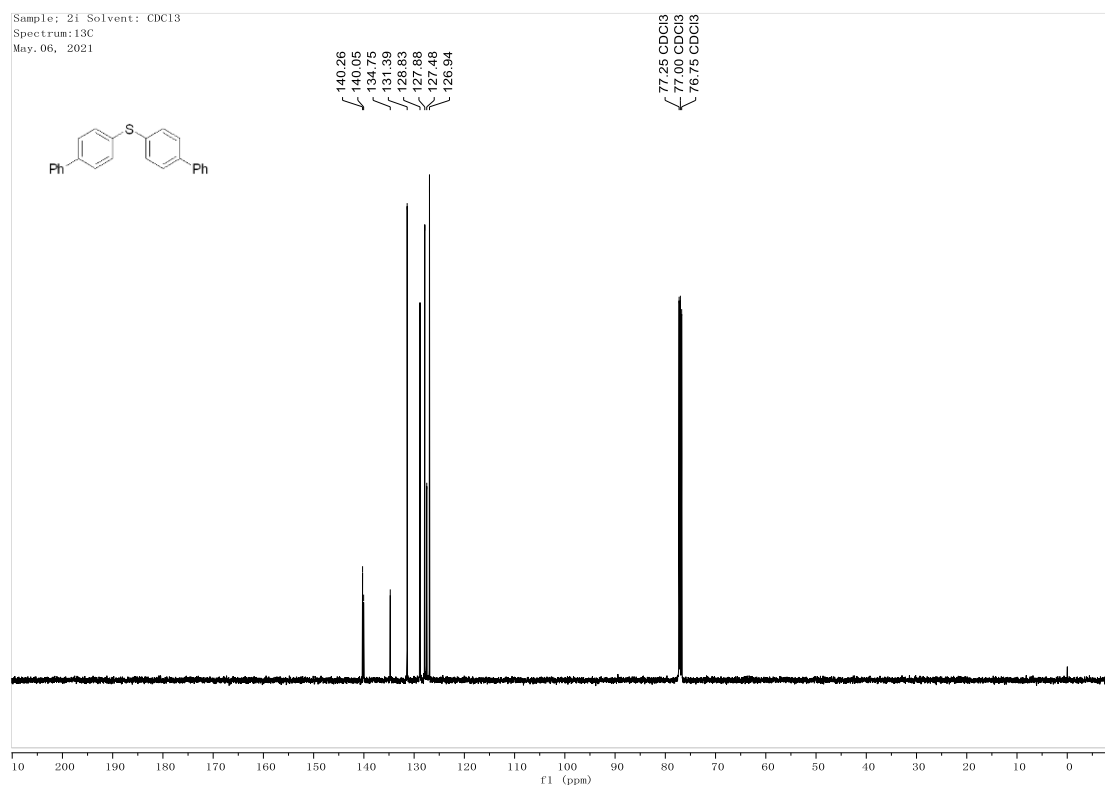

**Fig. 10.**  $^1\text{H}$  NMR (500 MHz,  $\text{CDCl}_3$ ) and  $^{13}\text{C}$  NMR (126 MHz,  $\text{CDCl}_3$ ) spectra of

**2j**

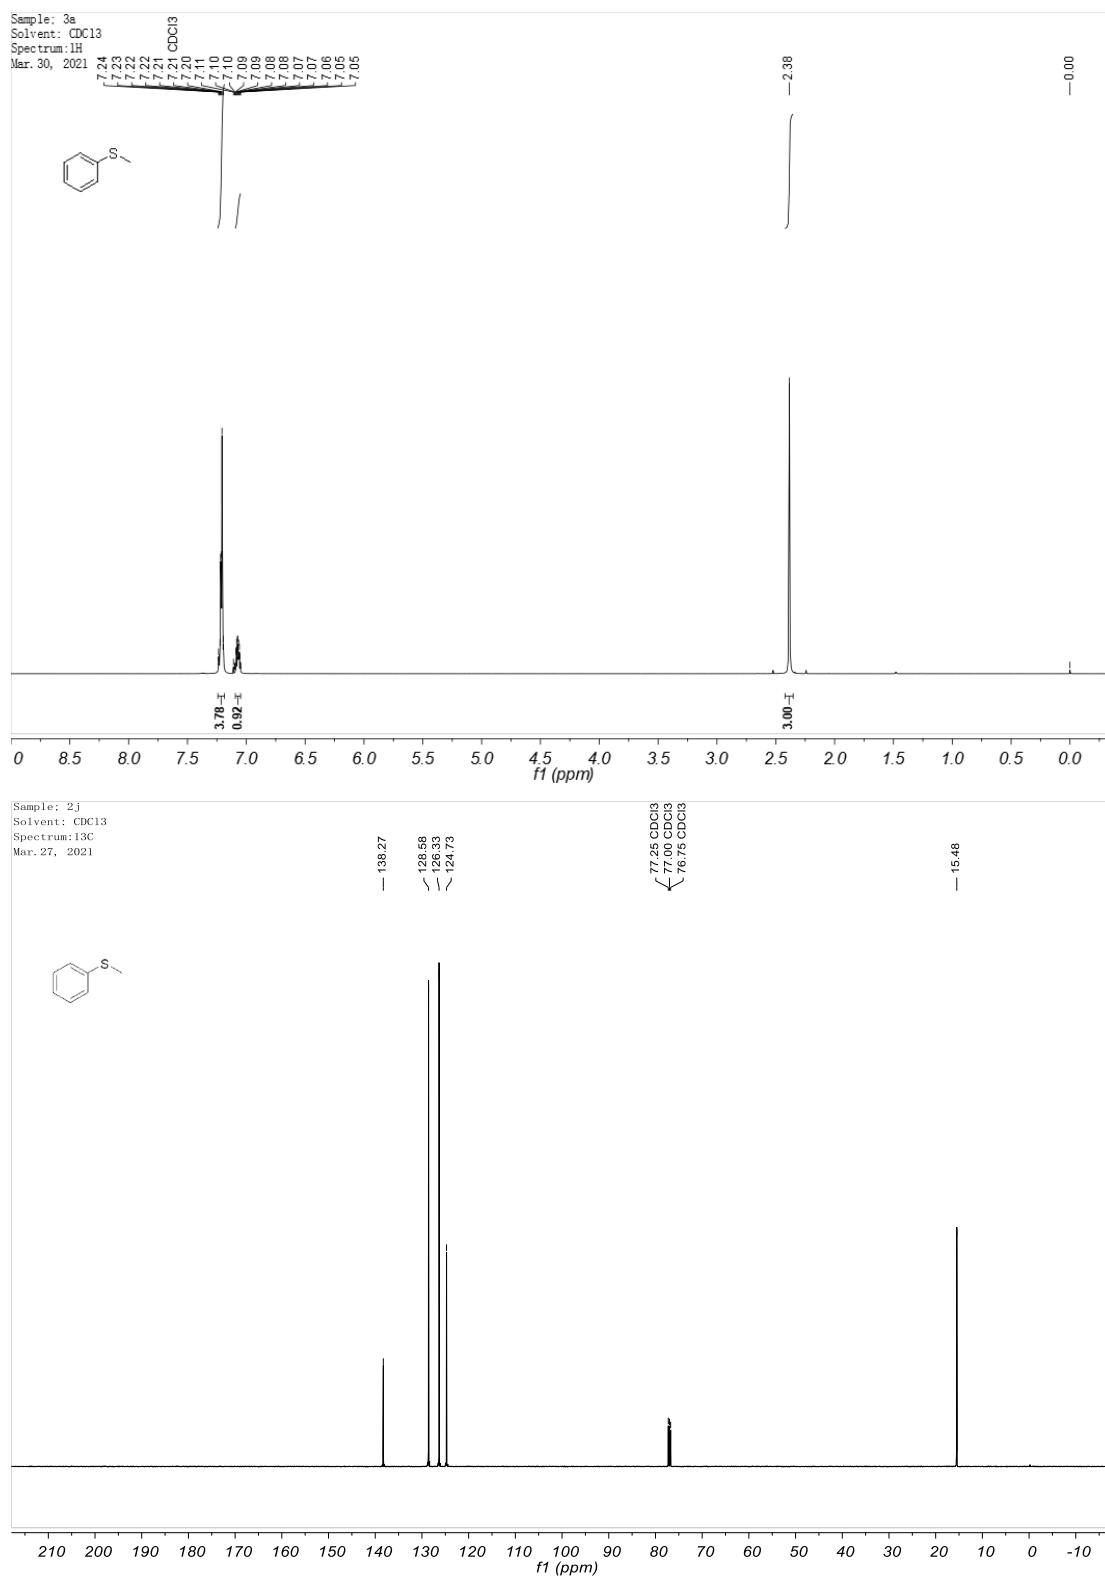

**Fig. 11. <sup>1</sup>H NMR (500 MHz, CDCl<sub>3</sub>) and <sup>13</sup>C NMR (126 MHz, CDCl<sub>3</sub>) spectra of 2k**

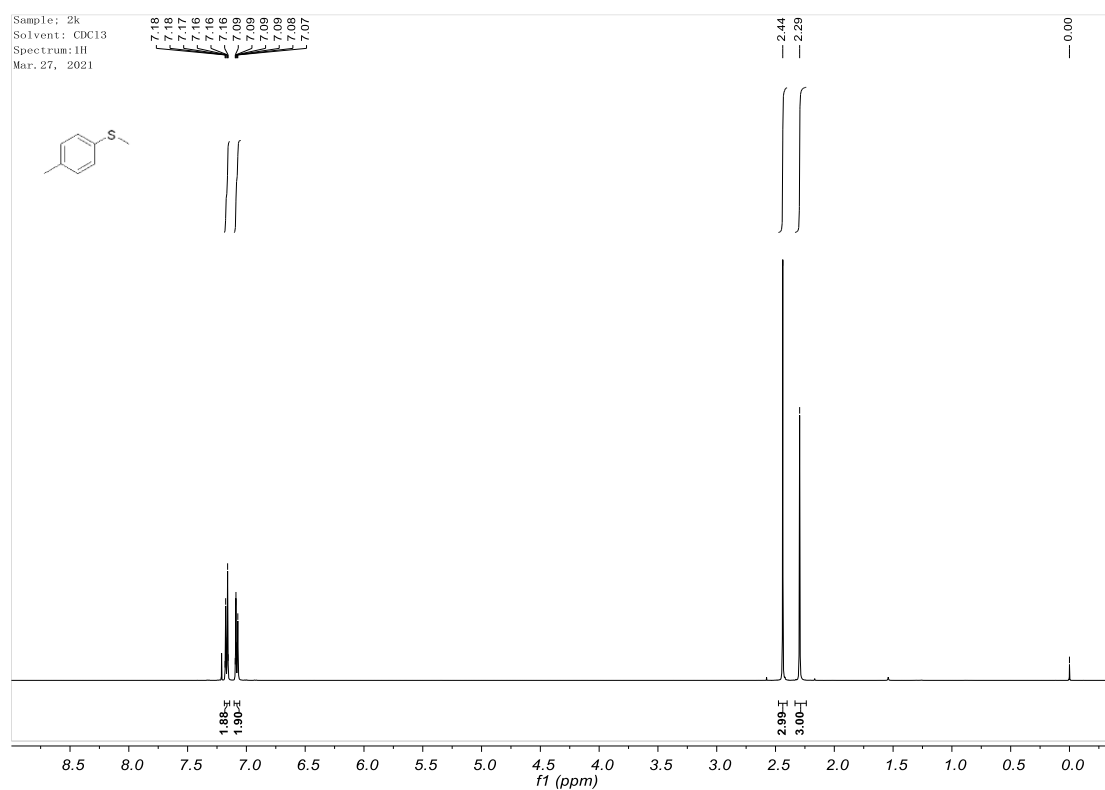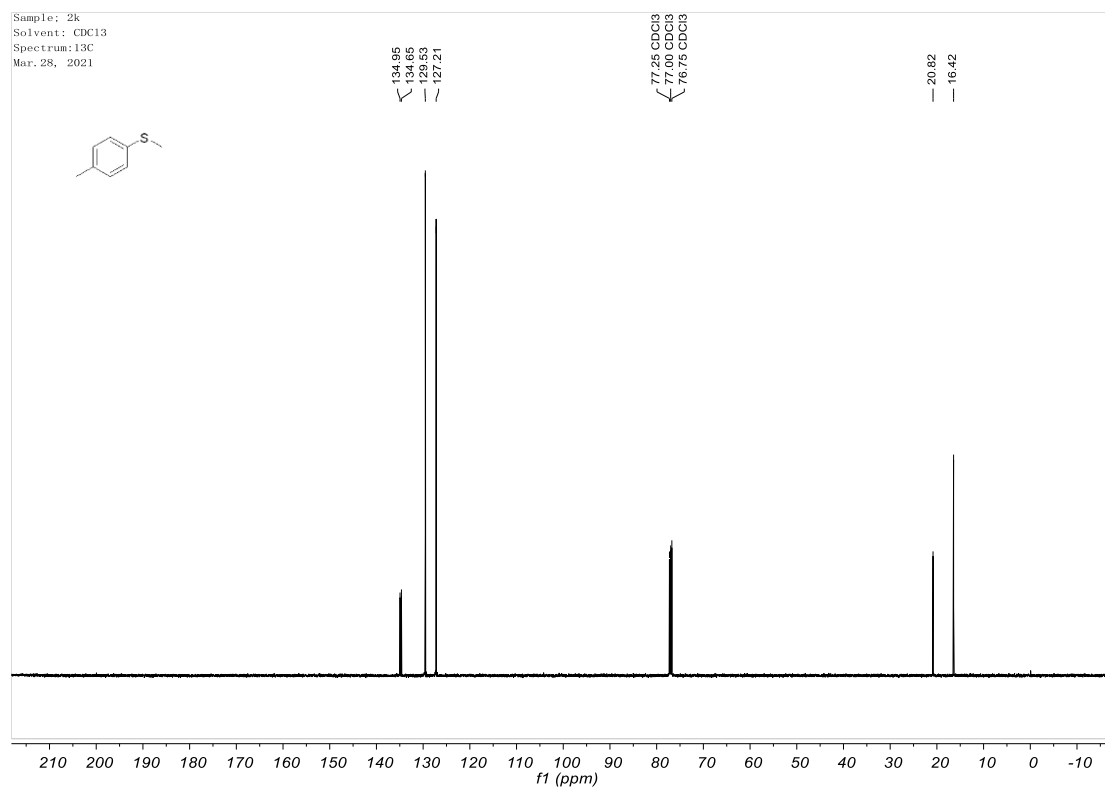

**Fig. 11.  $^1\text{H}$  NMR (500 MHz,  $\text{CDCl}_3$ ) and  $^{13}\text{C}$  NMR (126 MHz,  $\text{CDCl}_3$ ) spectra of 2l**

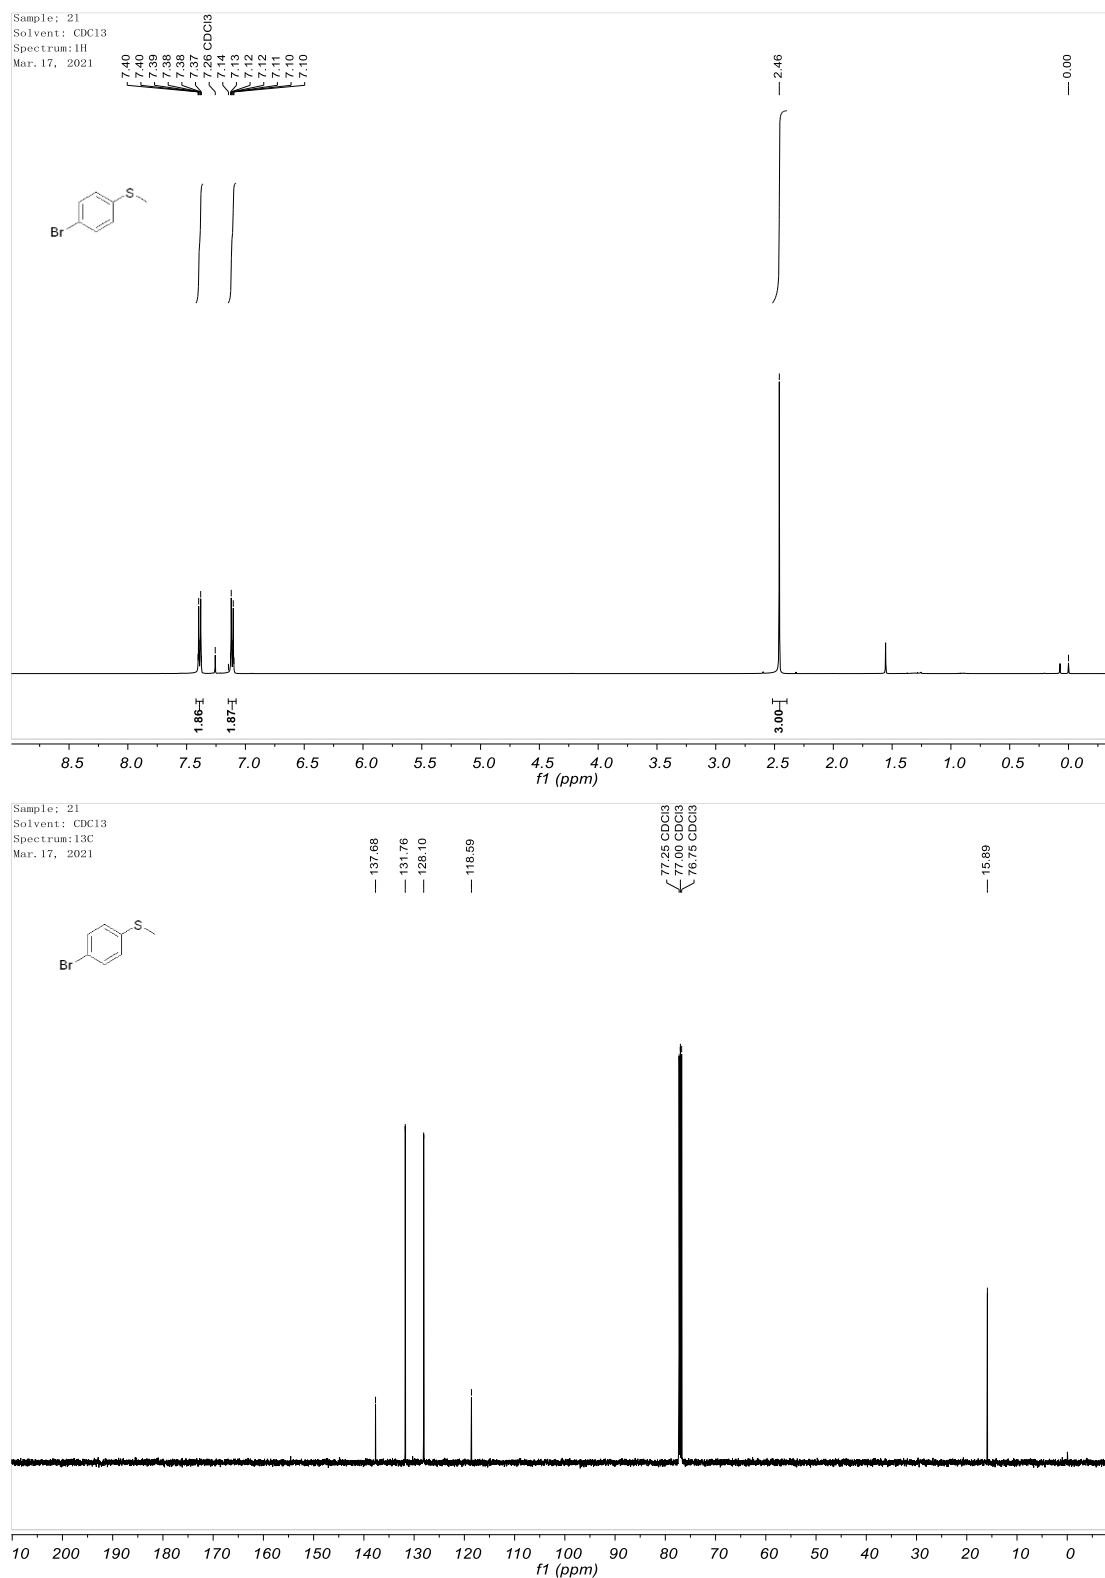

**Fig. 12.**  $^1\text{H}$  NMR (500 MHz,  $\text{CDCl}_3$ ) and  $^{13}\text{C}$  NMR (126 MHz,  $\text{CDCl}_3$ ) spectra of **2m**

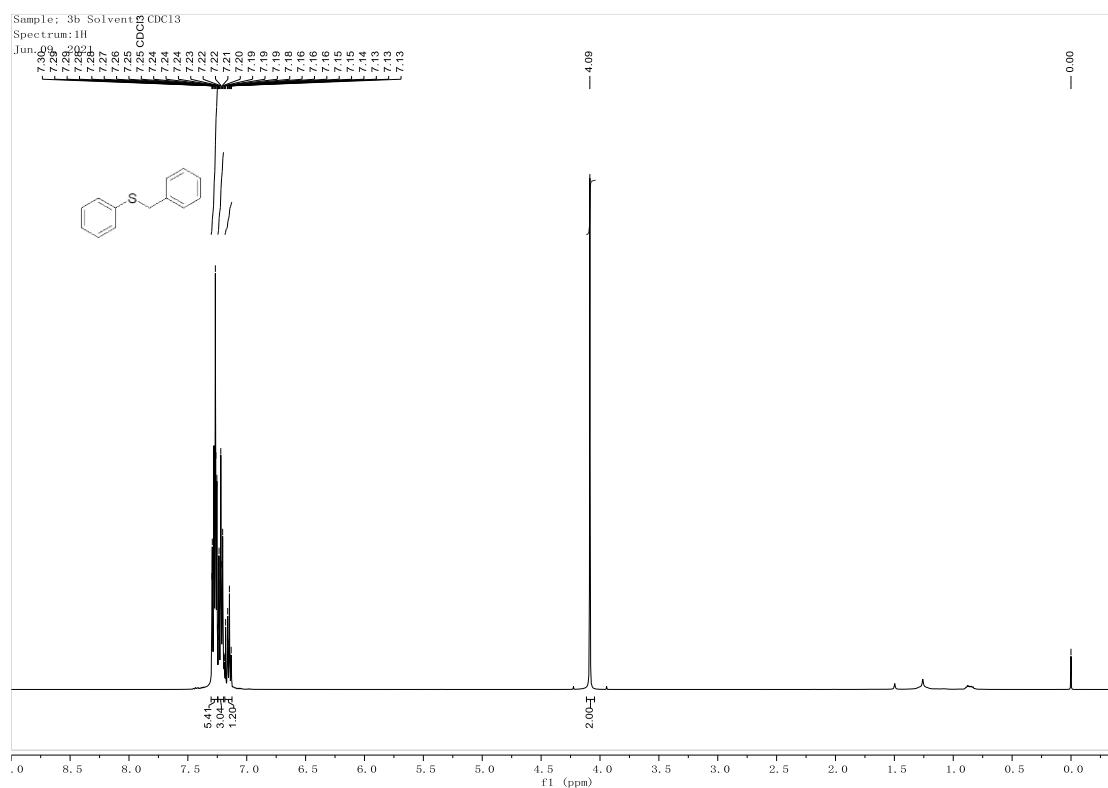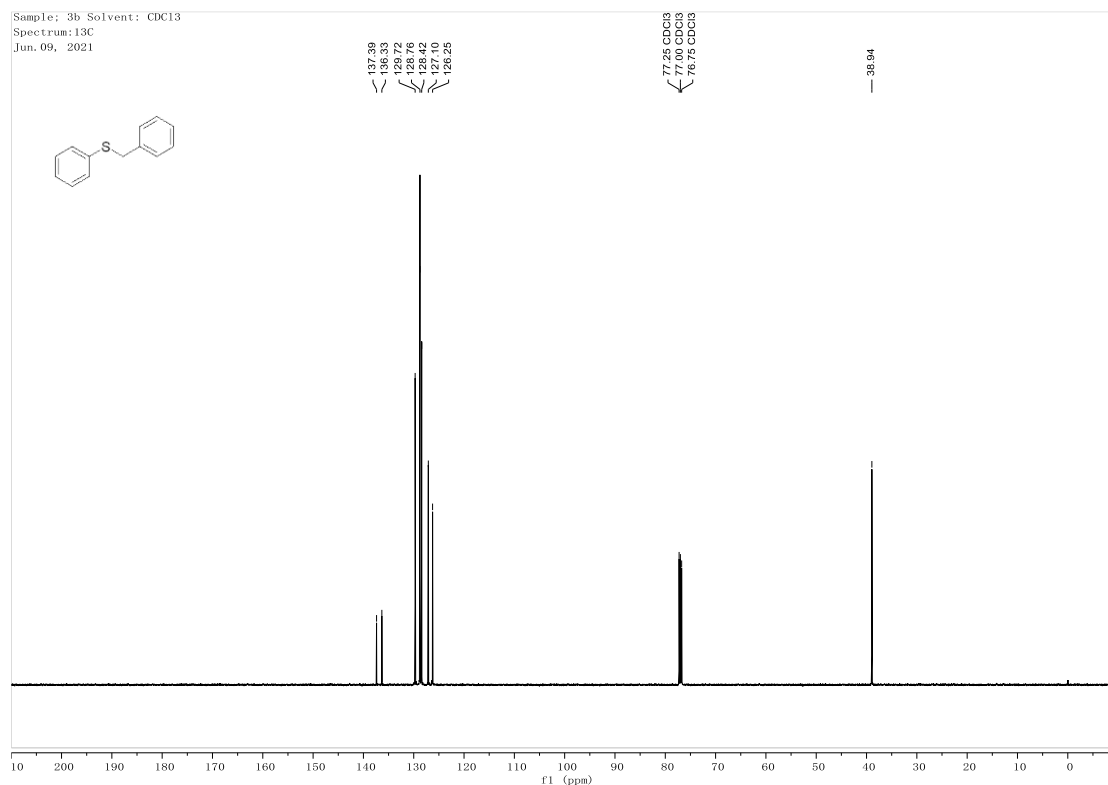

**Fig. 13.**  $^1\text{H}$  NMR (500 MHz,  $\text{CDCl}_3$ ) and  $^{13}\text{C}$  NMR (126 MHz,  $\text{CDCl}_3$ ) spectra of **2r**

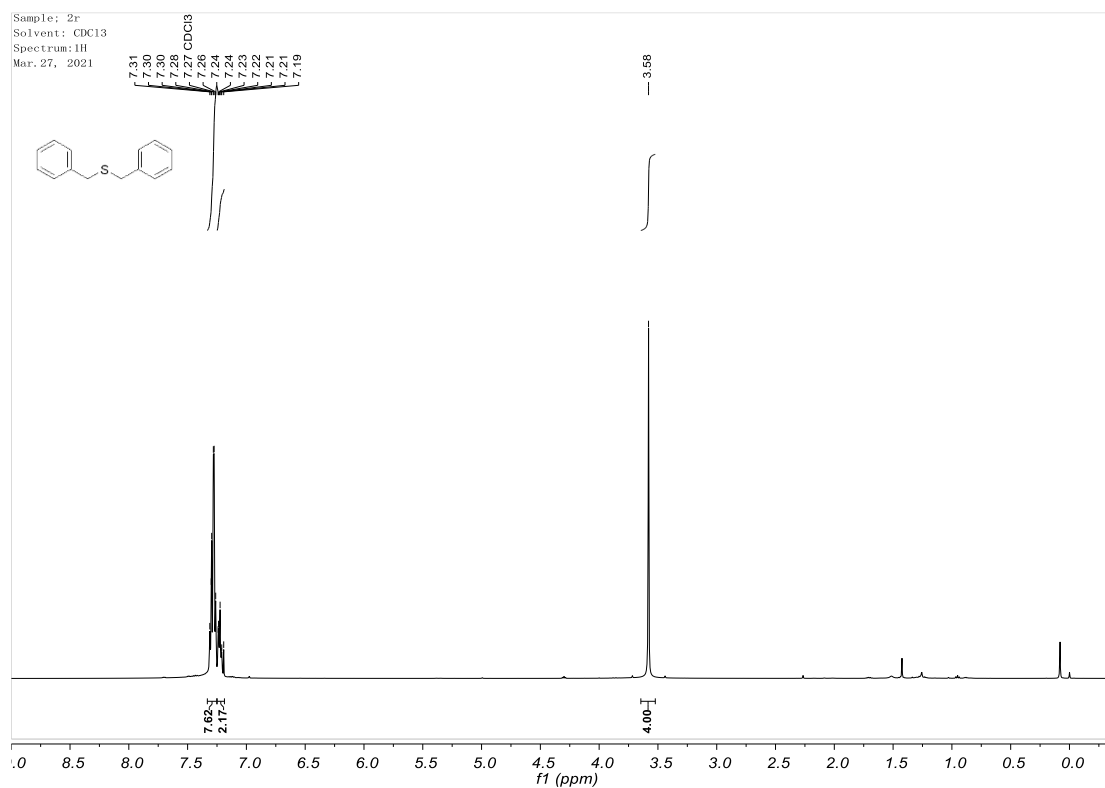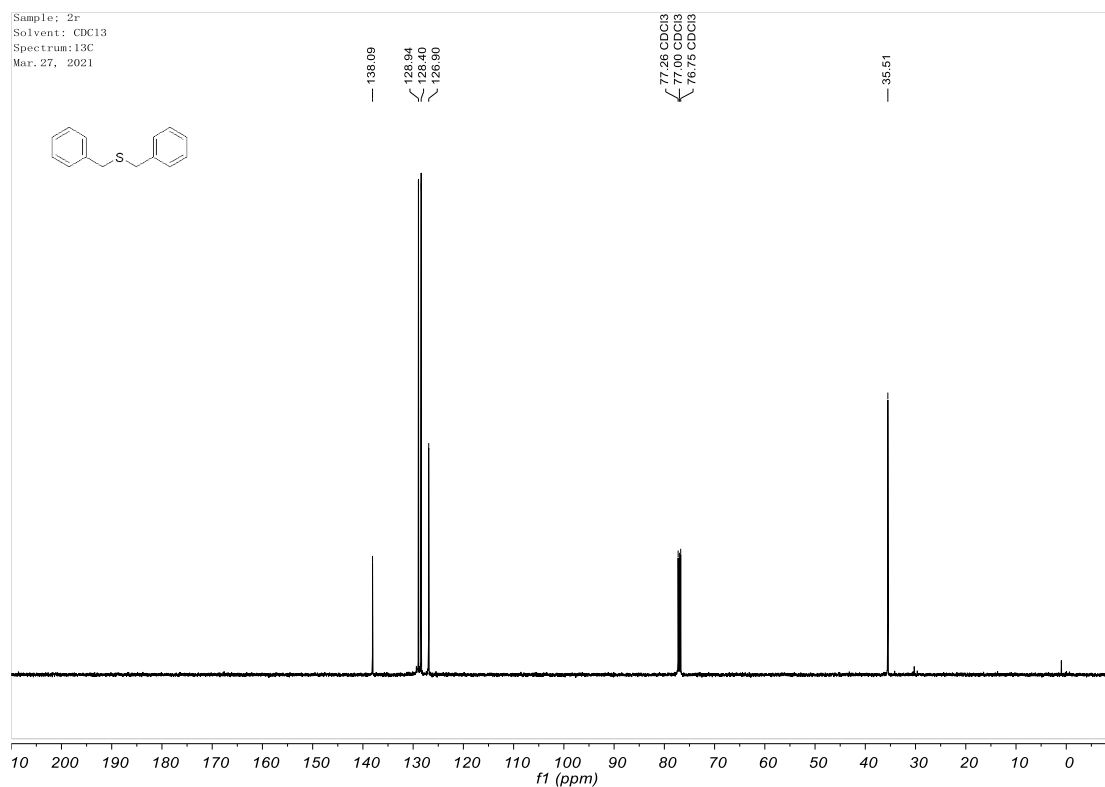

**Fig. 14.**  $^1\text{H}$  NMR (500 MHz,  $\text{CDCl}_3$ ) and  $^{13}\text{C}$  NMR (126 MHz,  $\text{CDCl}_3$ ) spectra of **2s**

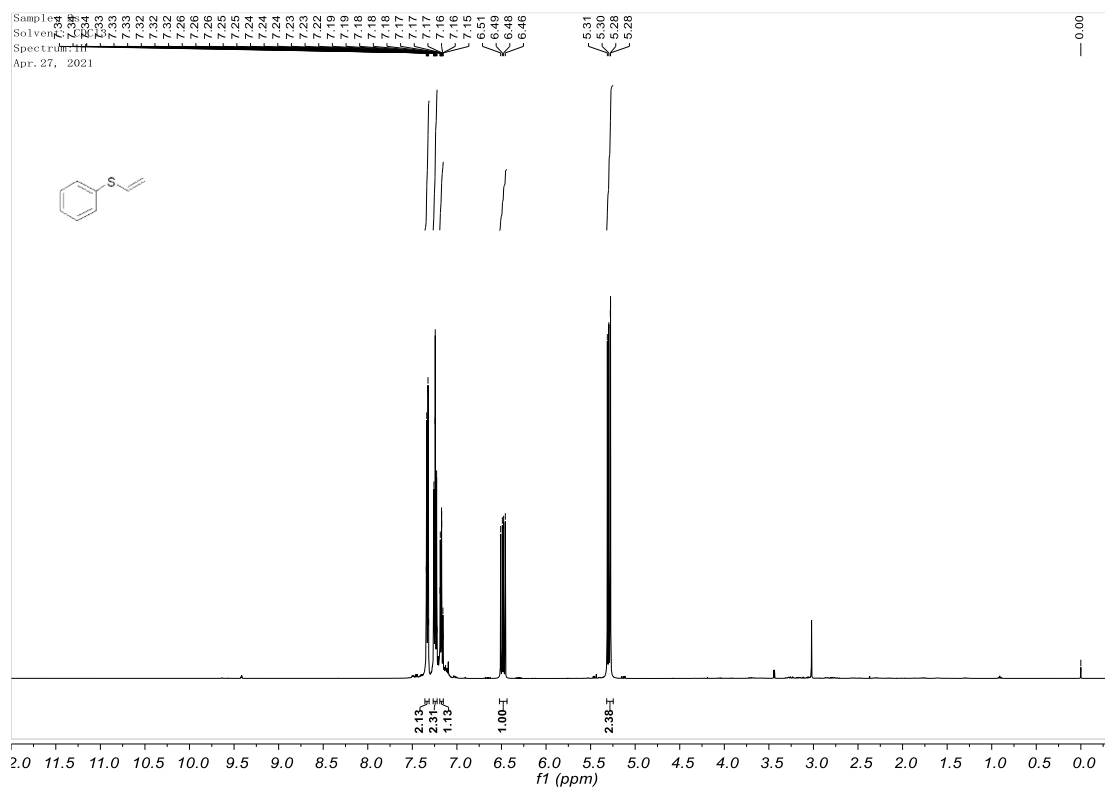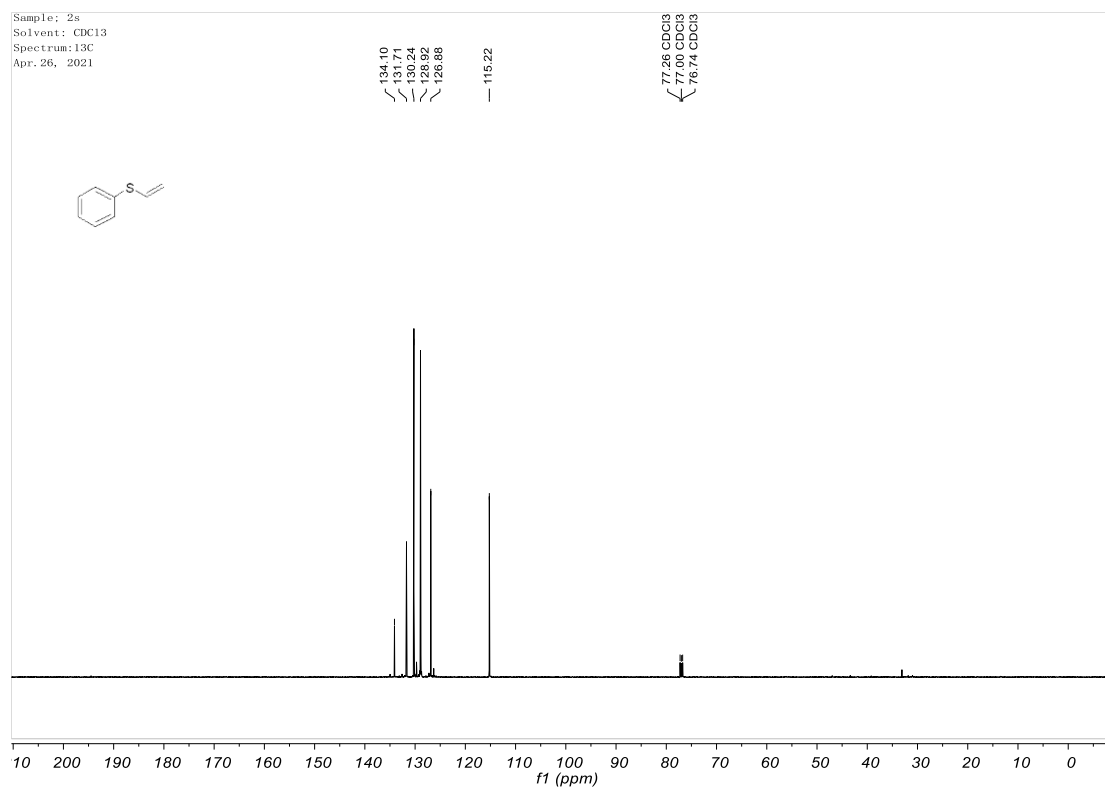



**Fig. 15. <sup>1</sup>H NMR (500 MHz, CDCl<sub>3</sub>) and <sup>13</sup>C NMR (126 MHz, CDCl<sub>3</sub>) spectra of 2t**

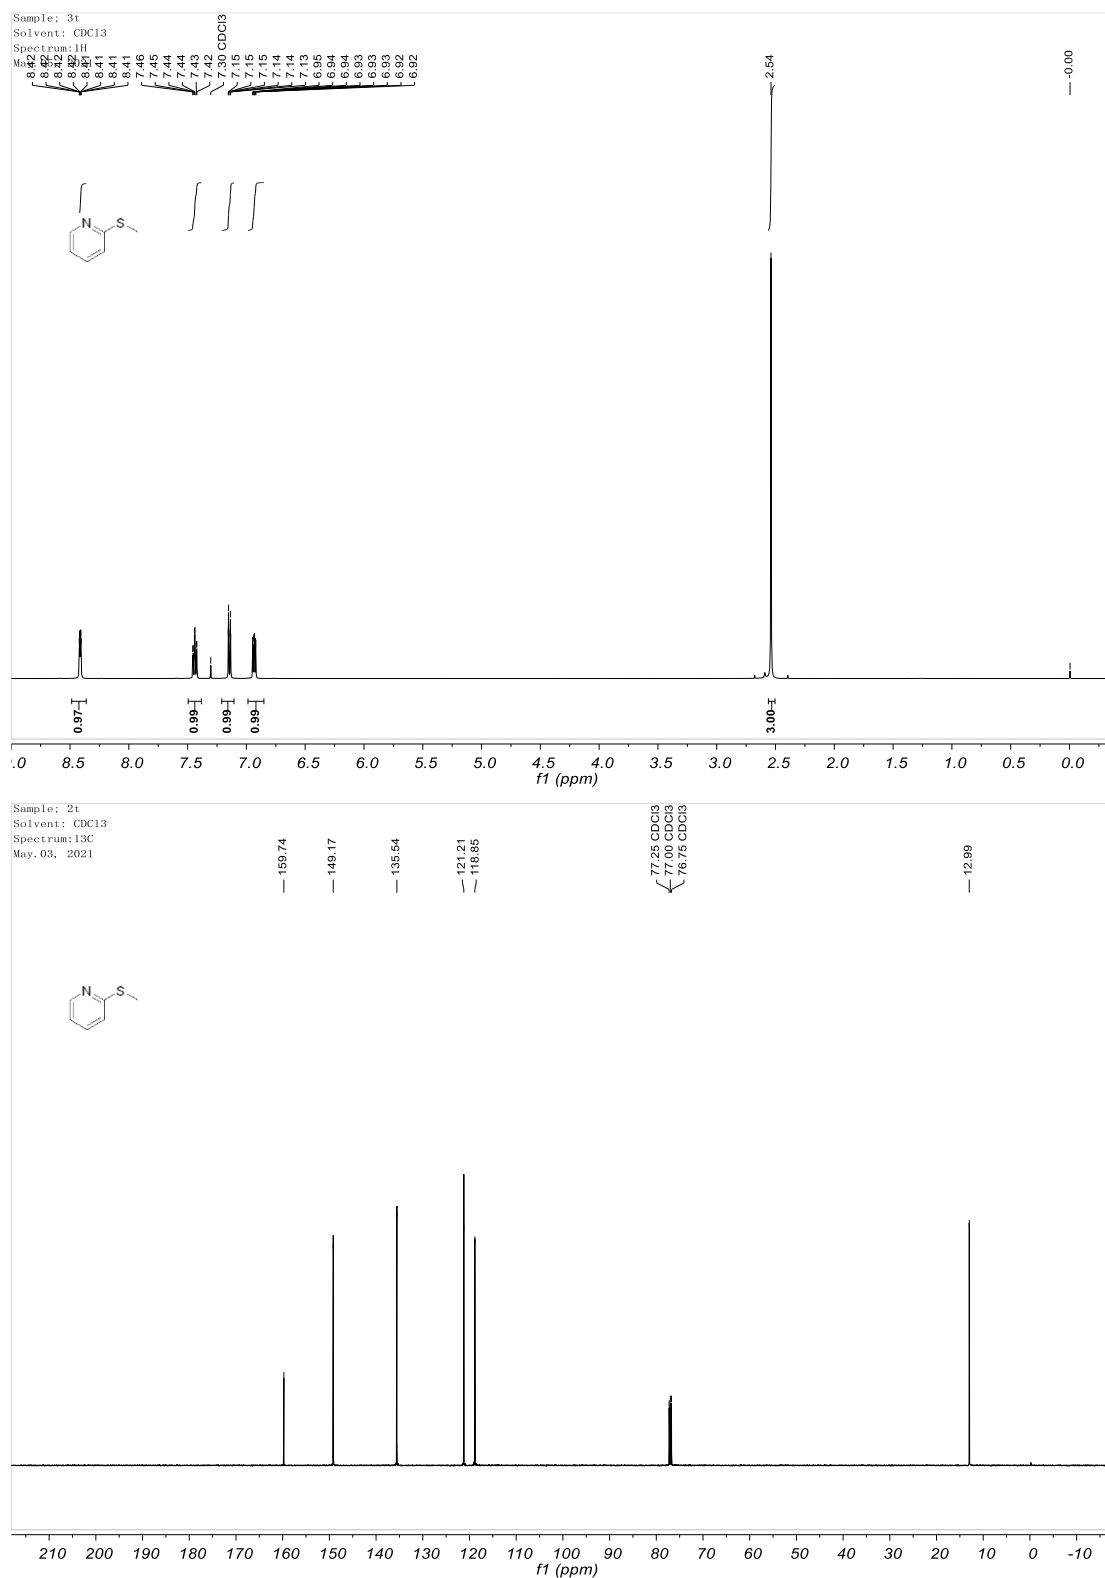

**Fig. 16.**  $^1\text{H}$  NMR (500 MHz,  $\text{CDCl}_3$ ) and  $^{13}\text{C}$  NMR (126 MHz,  $\text{CDCl}_3$ ) spectra of **2u**

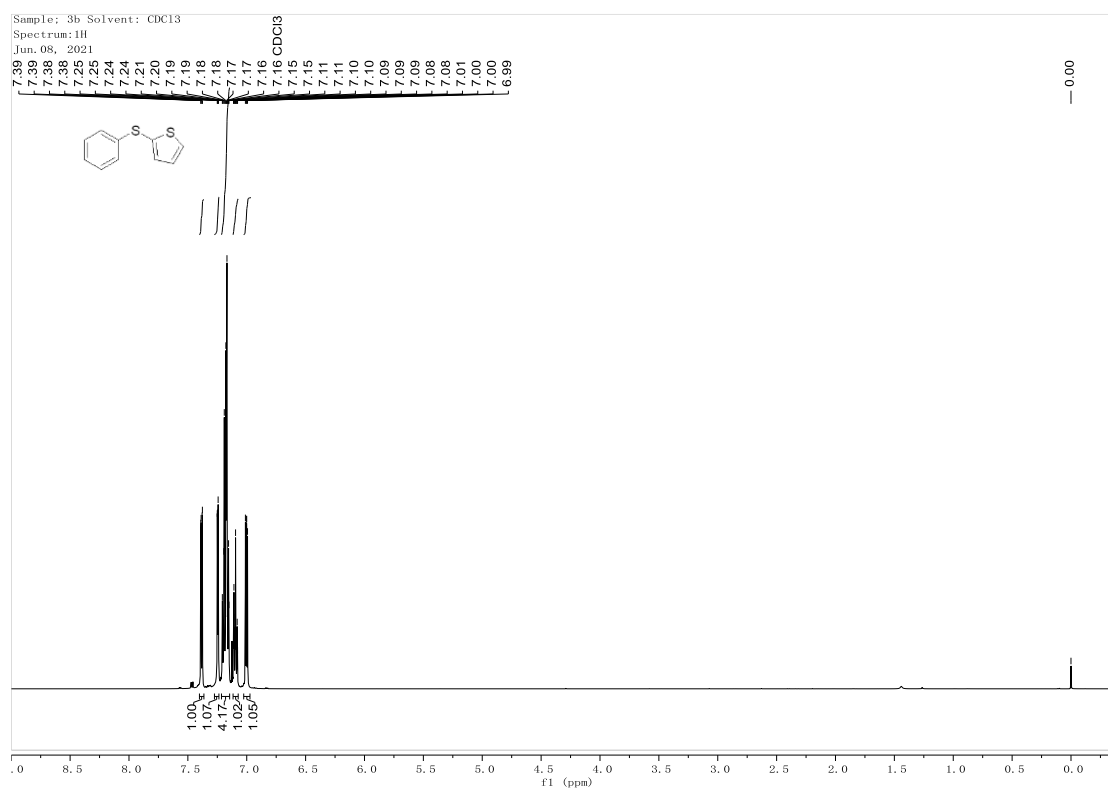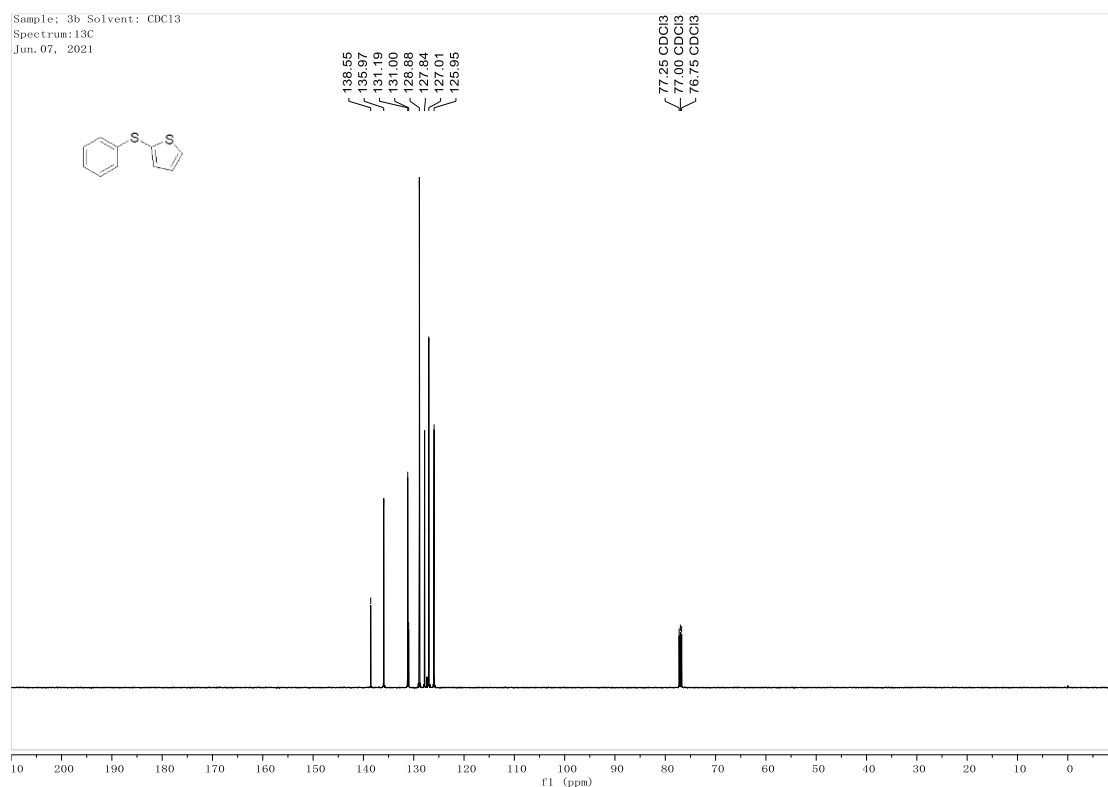

**Fig. 17.  $^1\text{H}$  NMR (500 MHz,  $\text{CDCl}_3$ ) and  $^{13}\text{C}$  NMR (126 MHz,  $\text{CDCl}_3$ ) spectra of **2v****

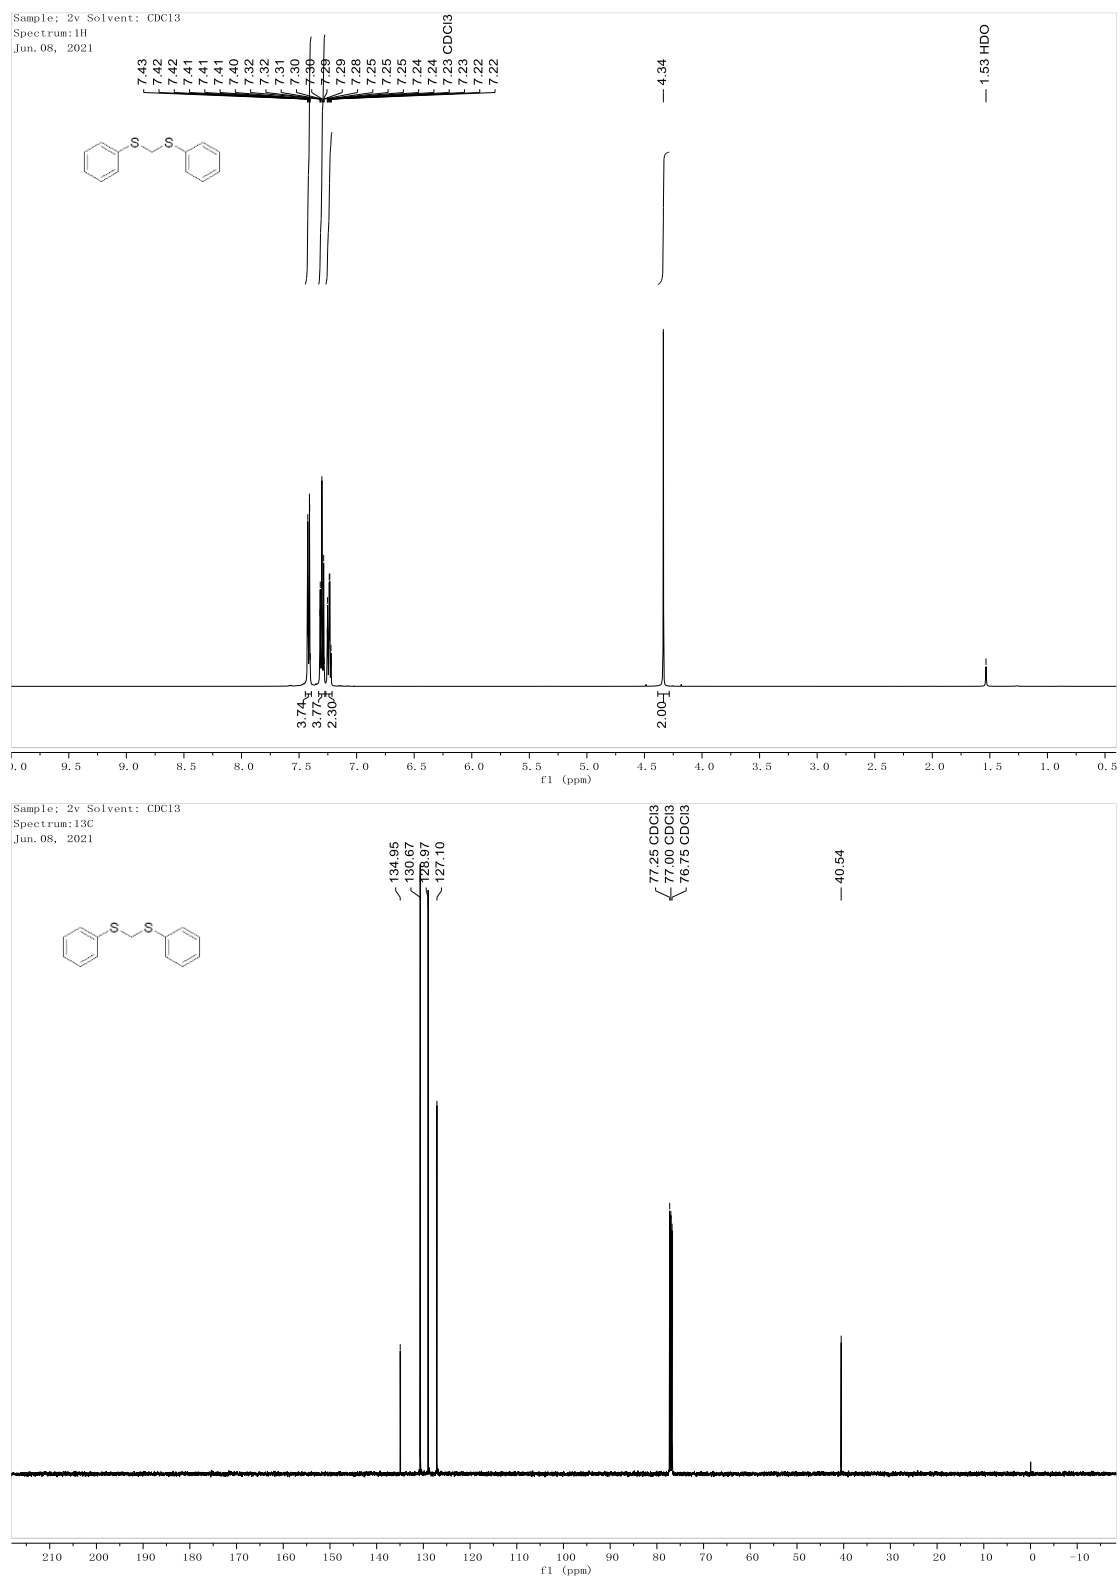

**Fig. 18.**  $^1\text{H}$  NMR (500 MHz,  $\text{CDCl}_3$ ) and  $^{13}\text{C}$  NMR (126 MHz,  $\text{CDCl}_3$ ) spectra of **2w**

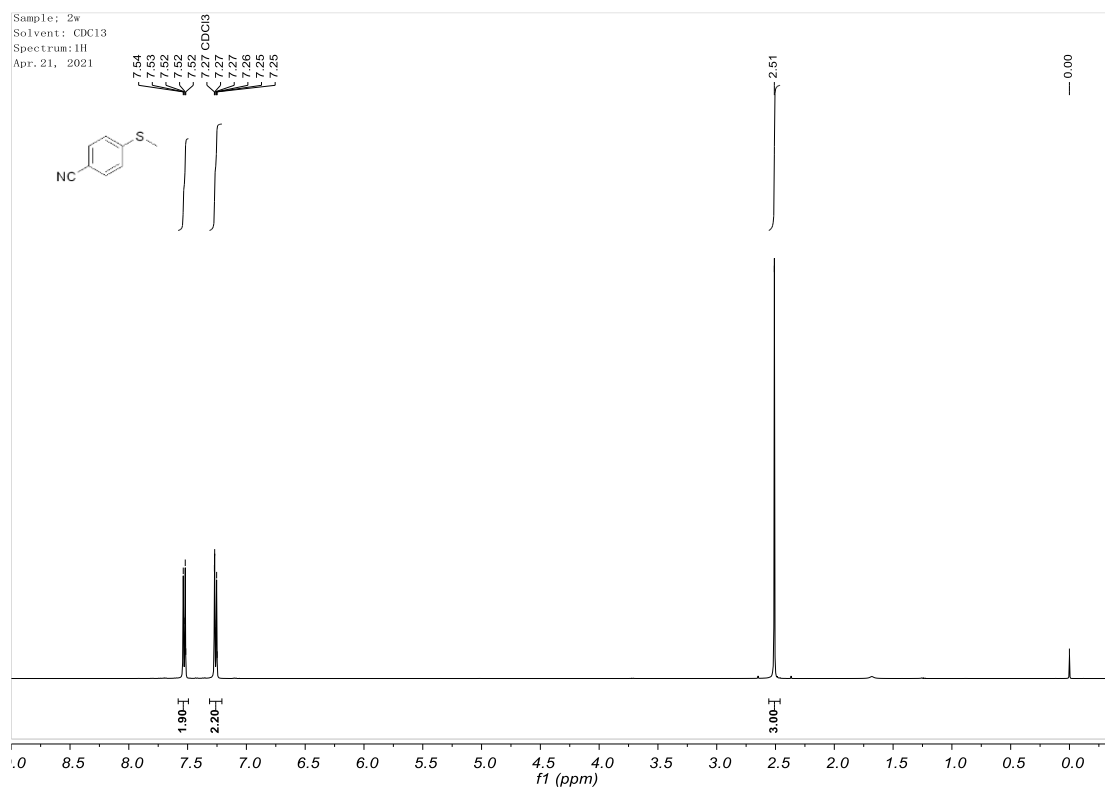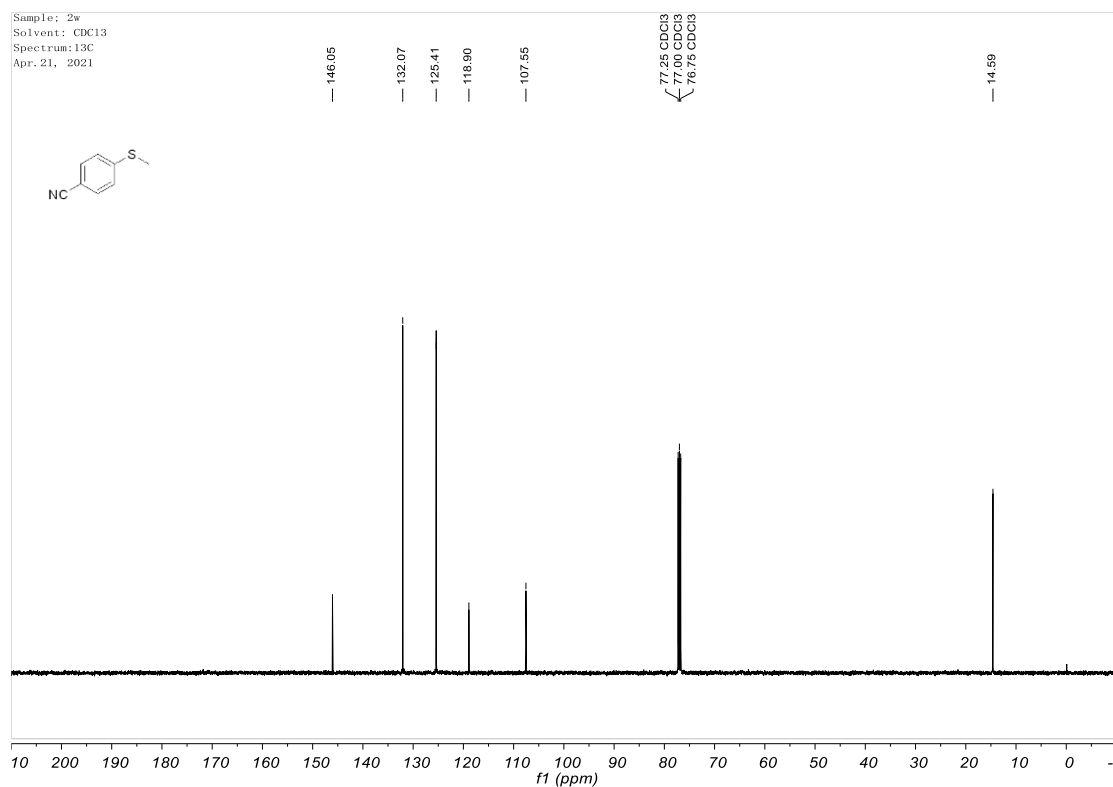

**Fig. 19.  $^1\text{H}$  NMR (500 MHz,  $\text{CDCl}_3$ ) and  $^{13}\text{C}$  NMR (126 MHz,  $\text{CDCl}_3$ ) spectra of**

**2x**

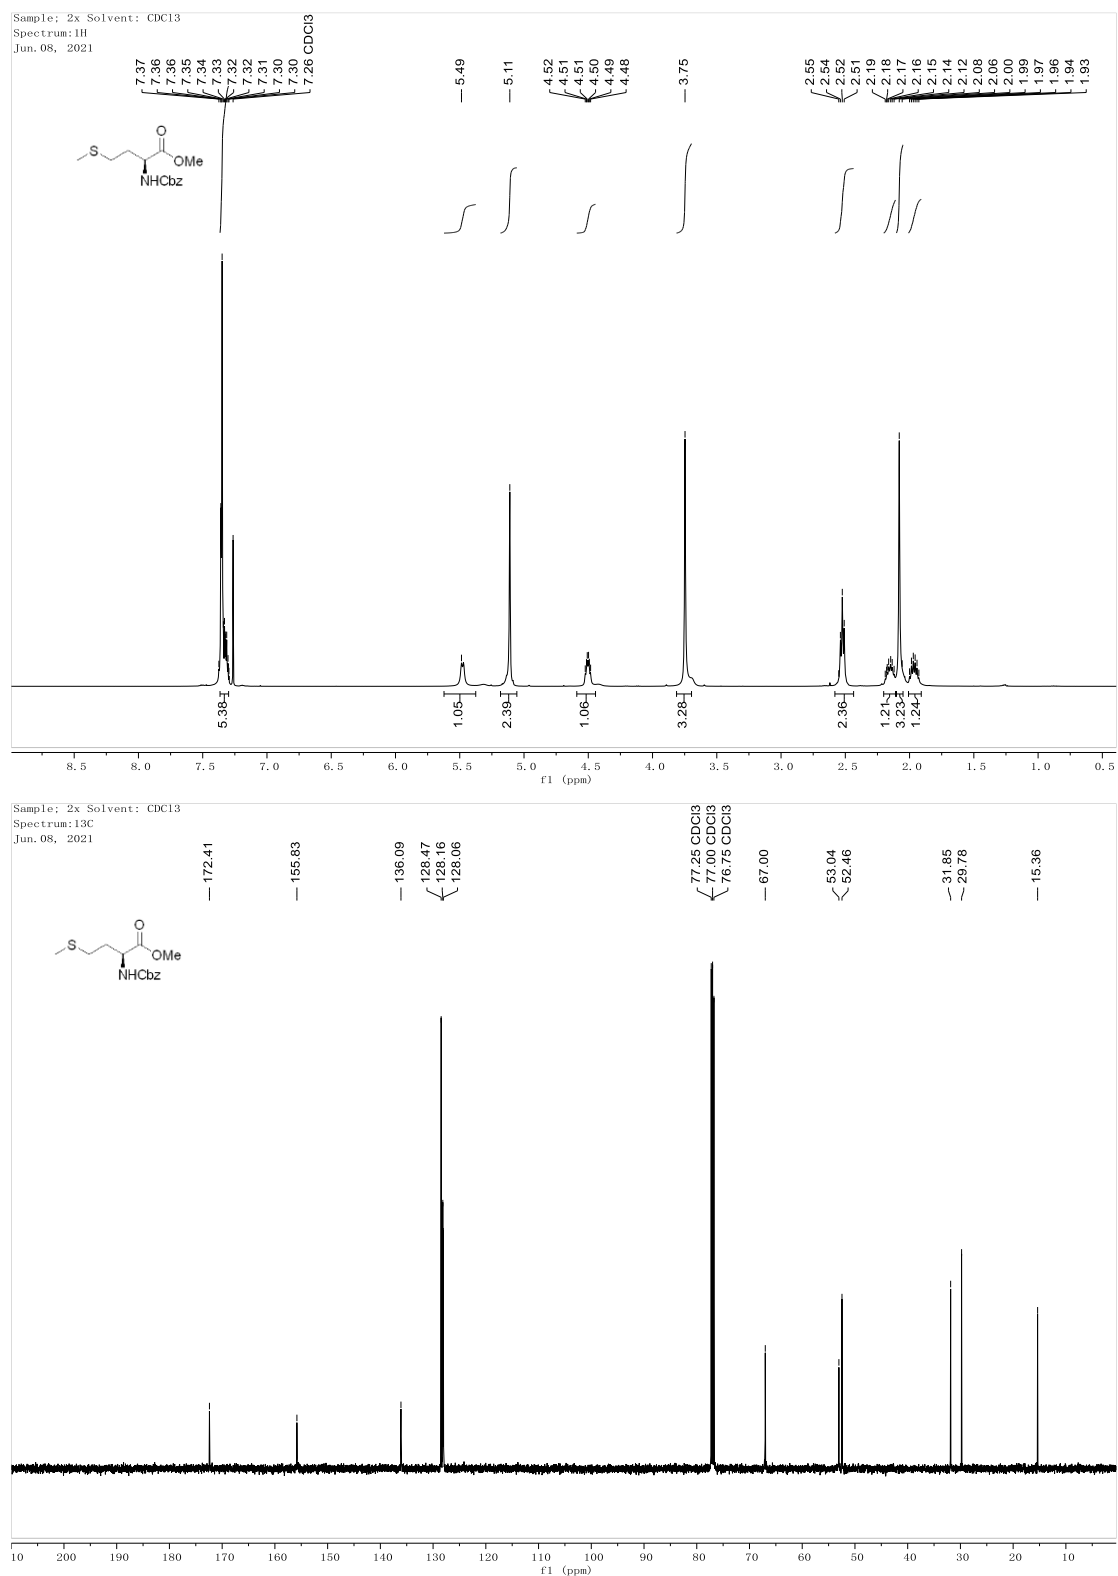

**Fig. 20.  $^1\text{H}$  NMR (500 MHz,  $\text{CDCl}_3$ ) and  $^{13}\text{C}$  NMR (126 MHz,  $\text{CDCl}_3$ ) spectra of **2y****

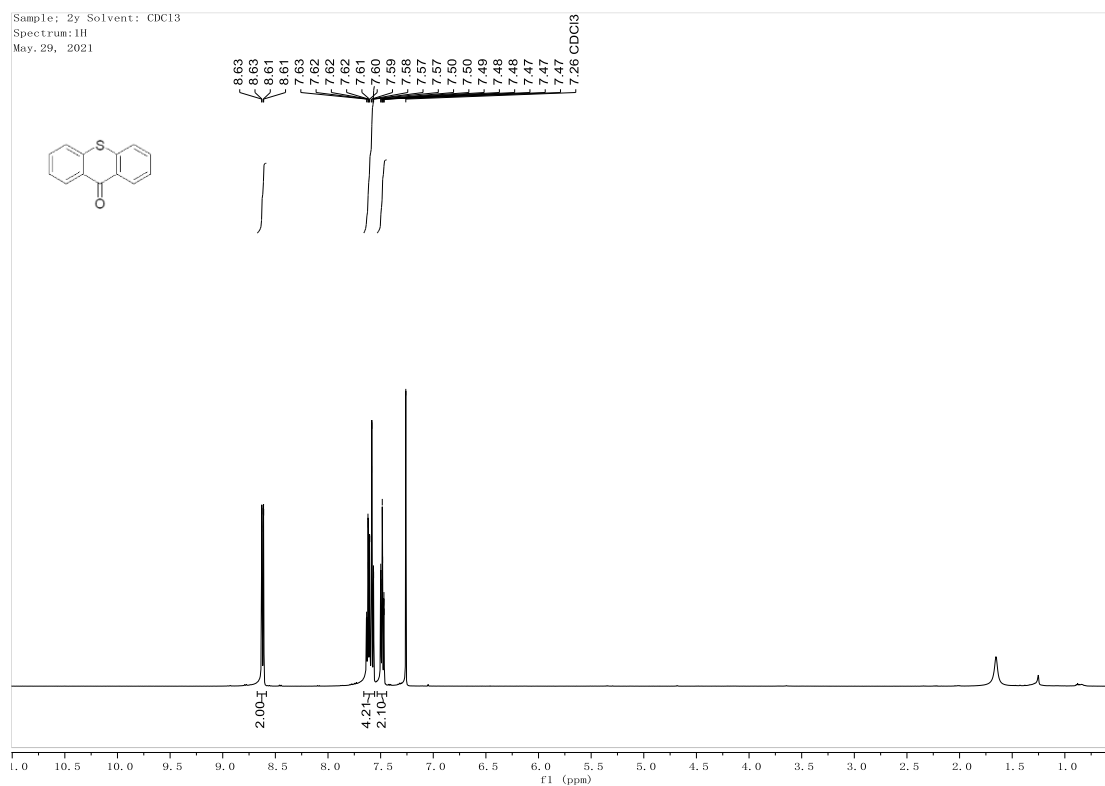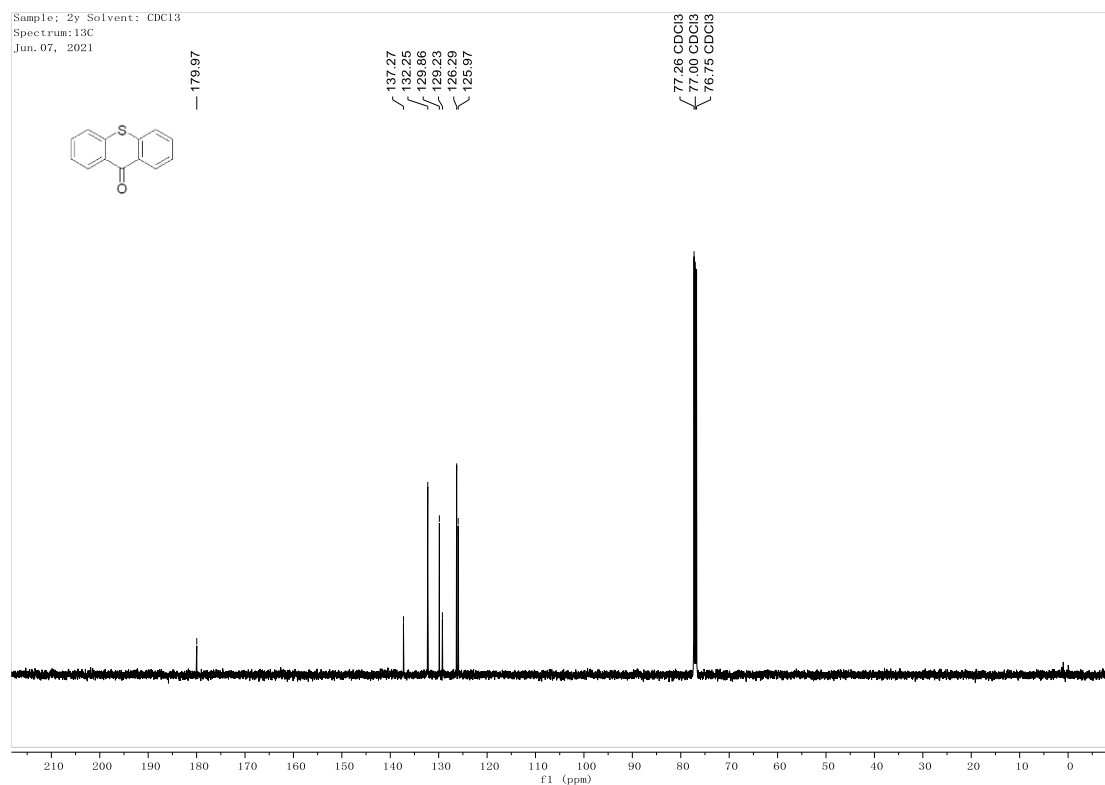

**Fig. 21.**  $^1\text{H}$  NMR (500 MHz,  $\text{CDCl}_3$ ) and  $^{13}\text{C}$  NMR (126 MHz,  $\text{CDCl}_3$ ) spectra of **2z**

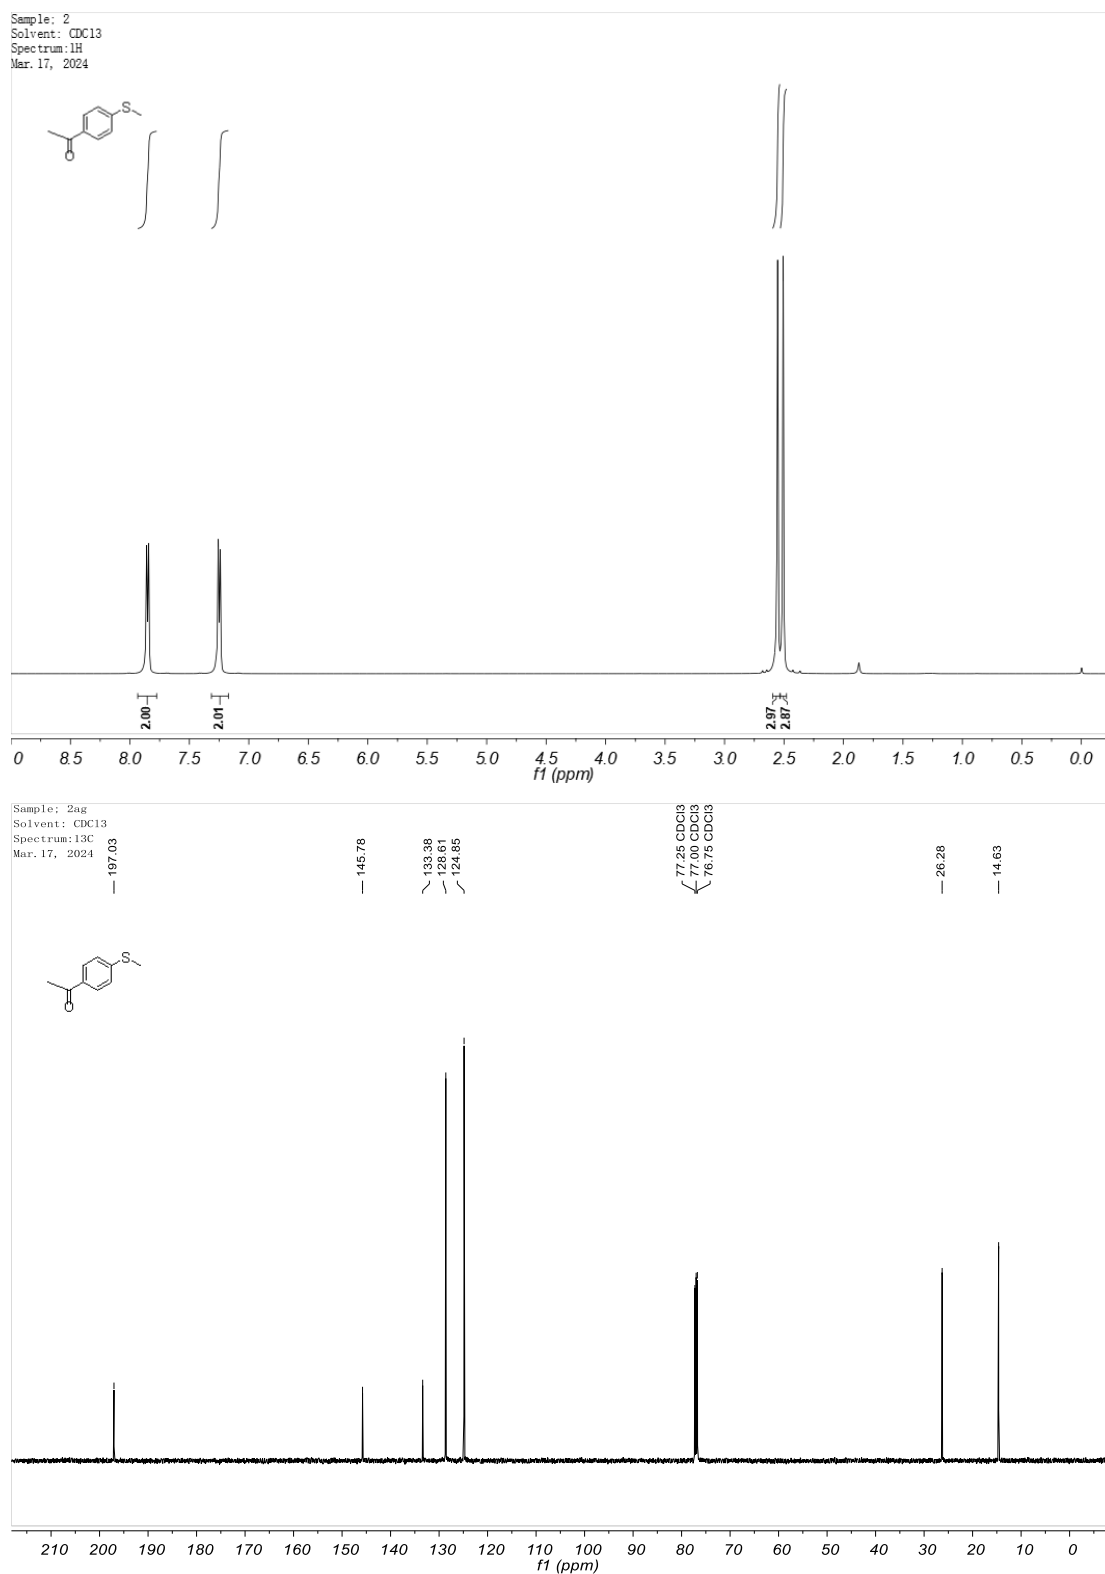

**Fig. 22.**  $^1\text{H}$  NMR (500 MHz,  $\text{CDCl}_3$ ) and  $^{13}\text{C}$  NMR (126 MHz,  $\text{CDCl}_3$ ) spectra of **2aa**

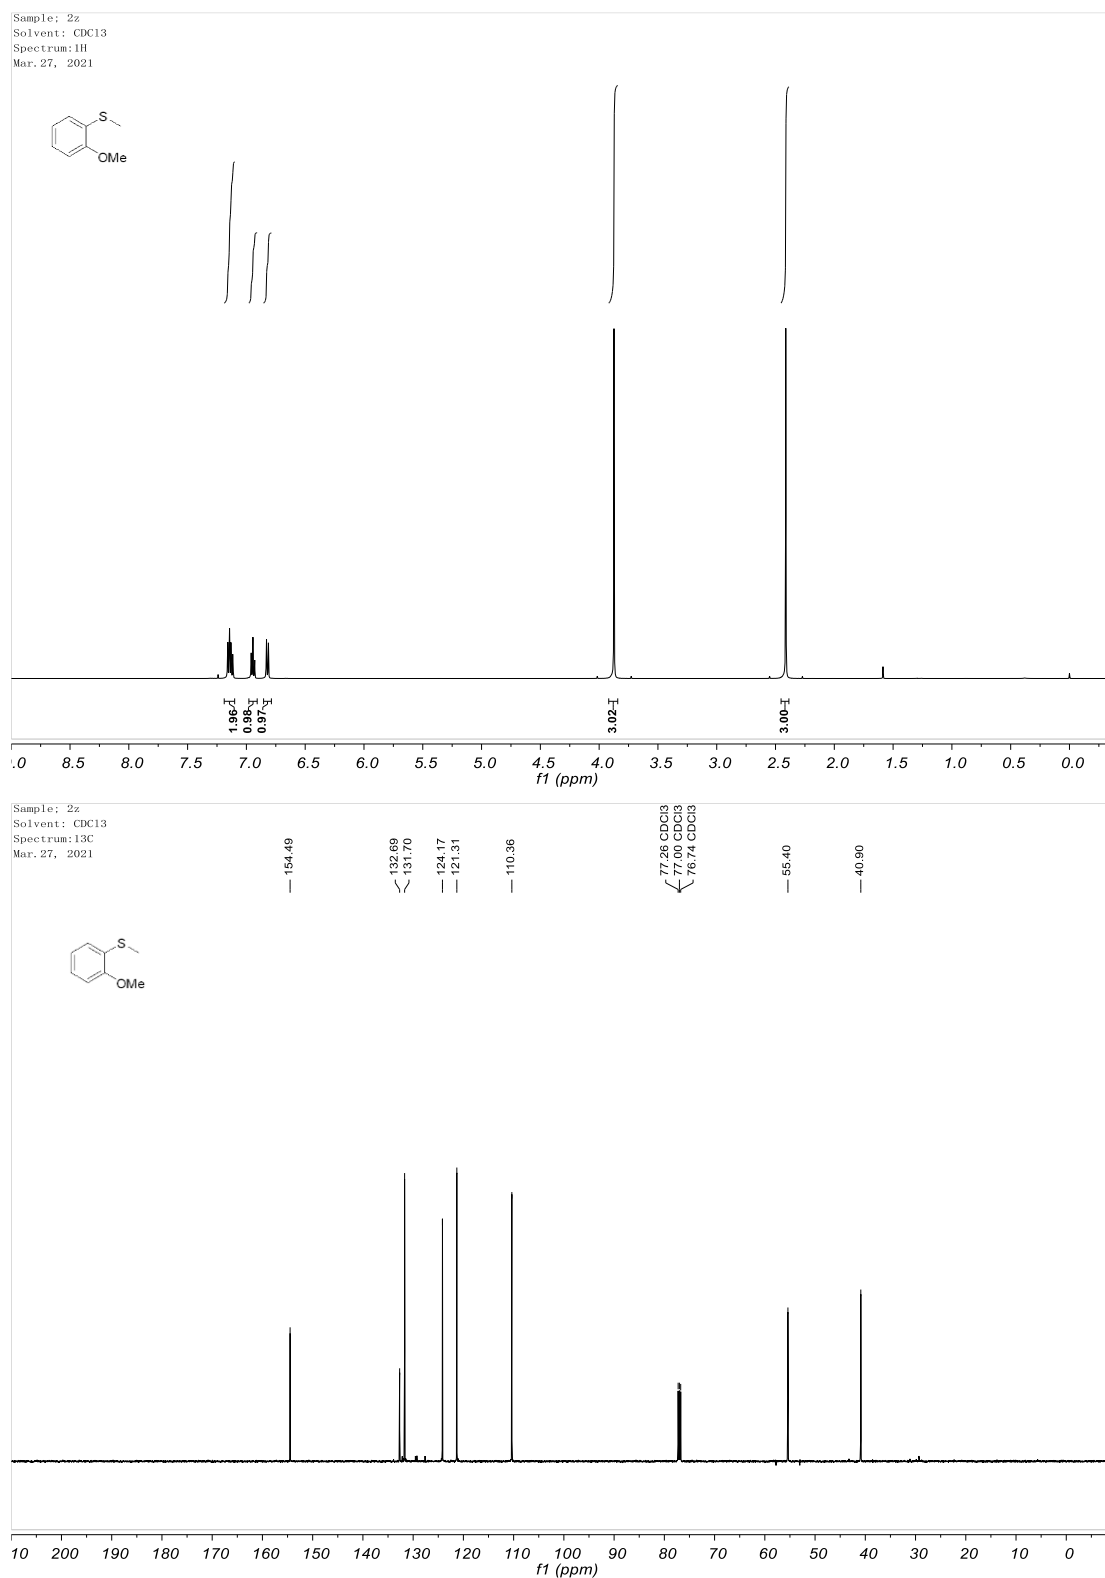



**Fig. 23.**  $^1\text{H}$  NMR (500 MHz,  $\text{CDCl}_3$ ) and  $^{13}\text{C}$  NMR (126 MHz,  $\text{CDCl}_3$ ) spectra of **2ab**

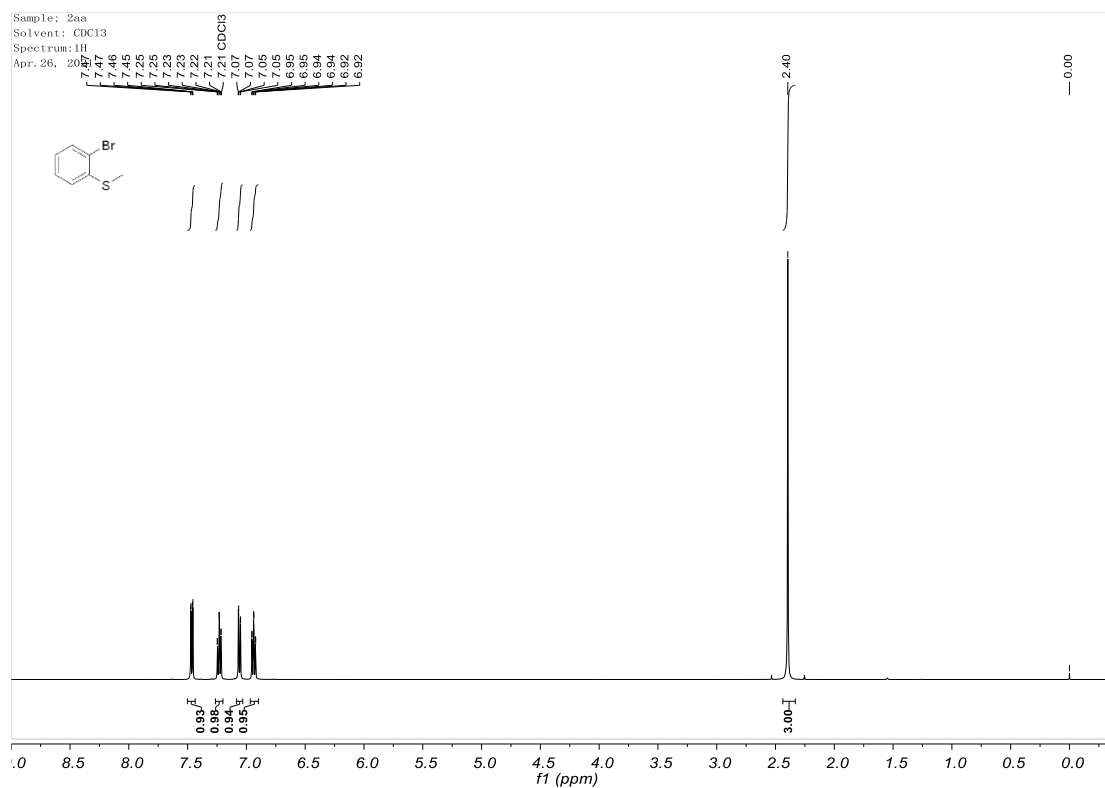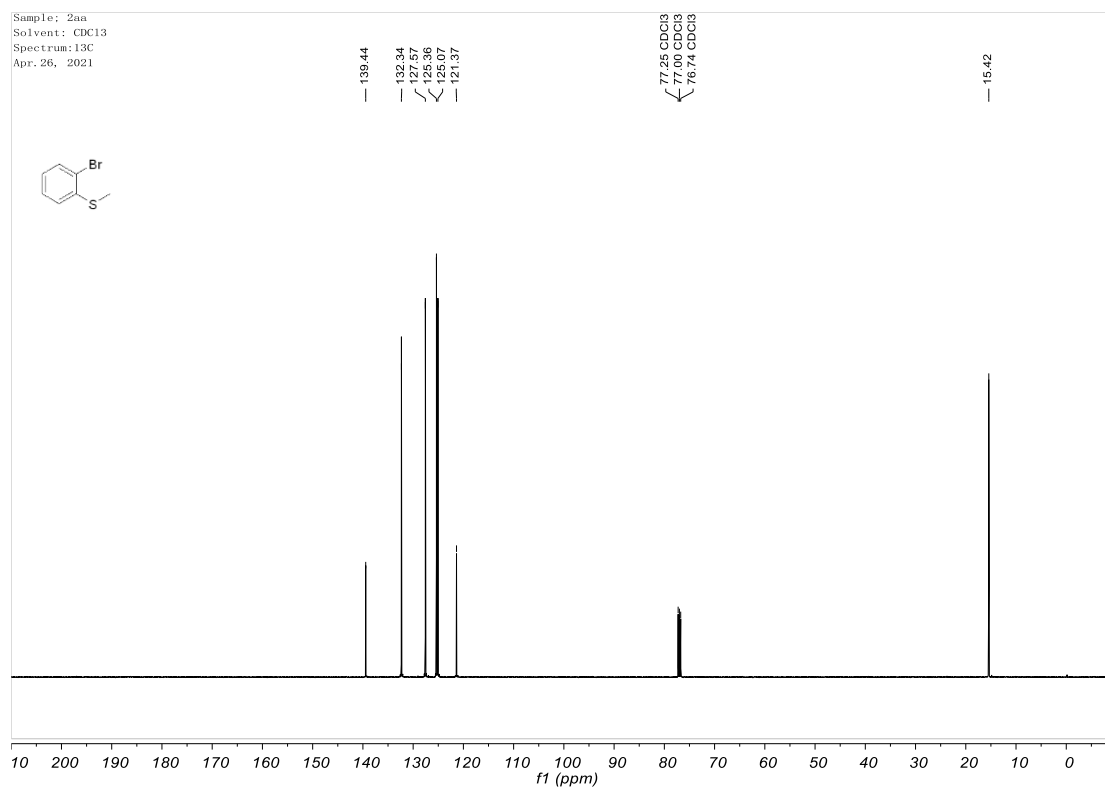

**Fig. 24.**  $^1\text{H}$  NMR (400 MHz,  $\text{CDCl}_3$ ) and  $^{13}\text{C}$  NMR (101 MHz,  $\text{CDCl}_3$ ) spectra of **2ac**

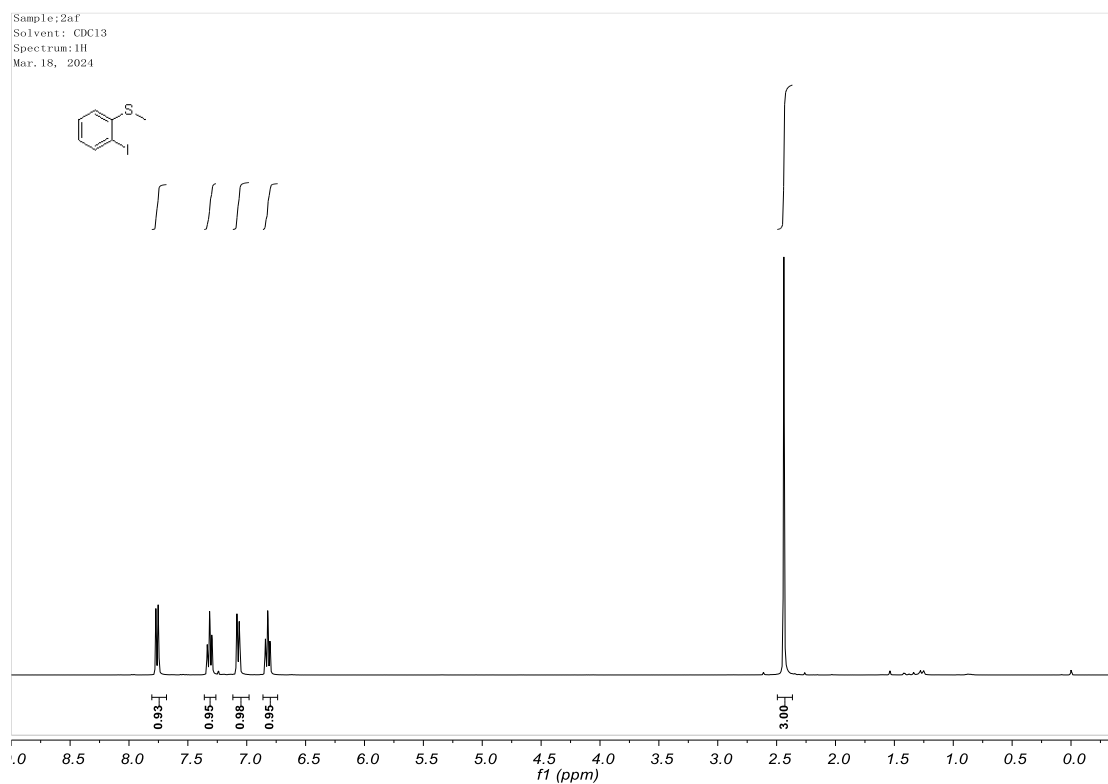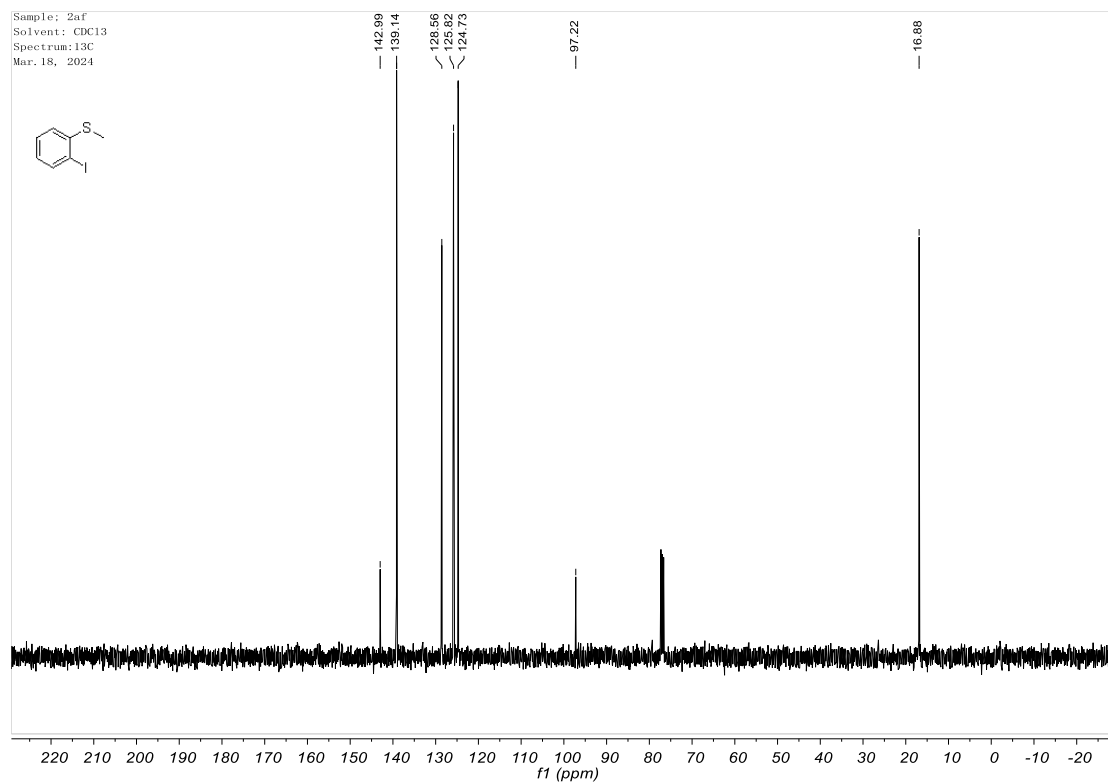

**Fig. 25.**  $^1\text{H}$  NMR (500 MHz,  $\text{CDCl}_3$ ) and  $^{13}\text{C}$  NMR (126 MHz,  $\text{CDCl}_3$ ) spectra of **2ad**

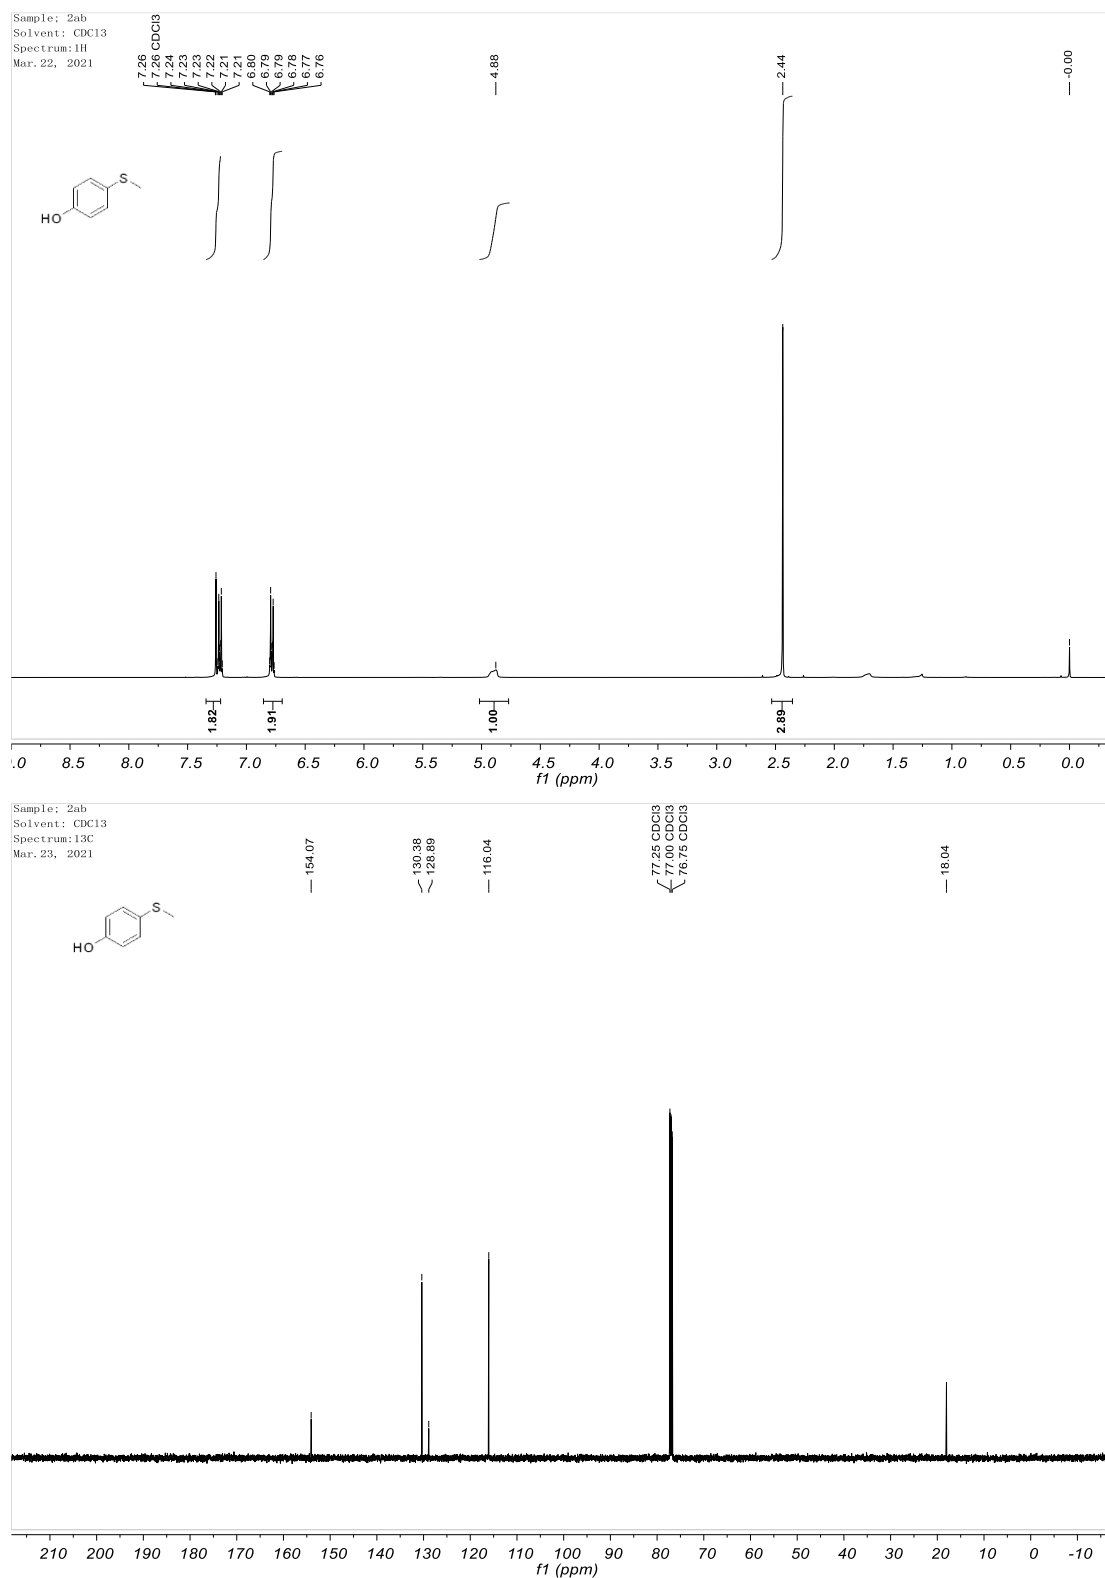

**Fig. 26.**  $^1\text{H}$  NMR (500 MHz,  $\text{CDCl}_3$ ) and  $^{13}\text{C}$  NMR (126 MHz,  $\text{CDCl}_3$ ) spectra of **2ae**

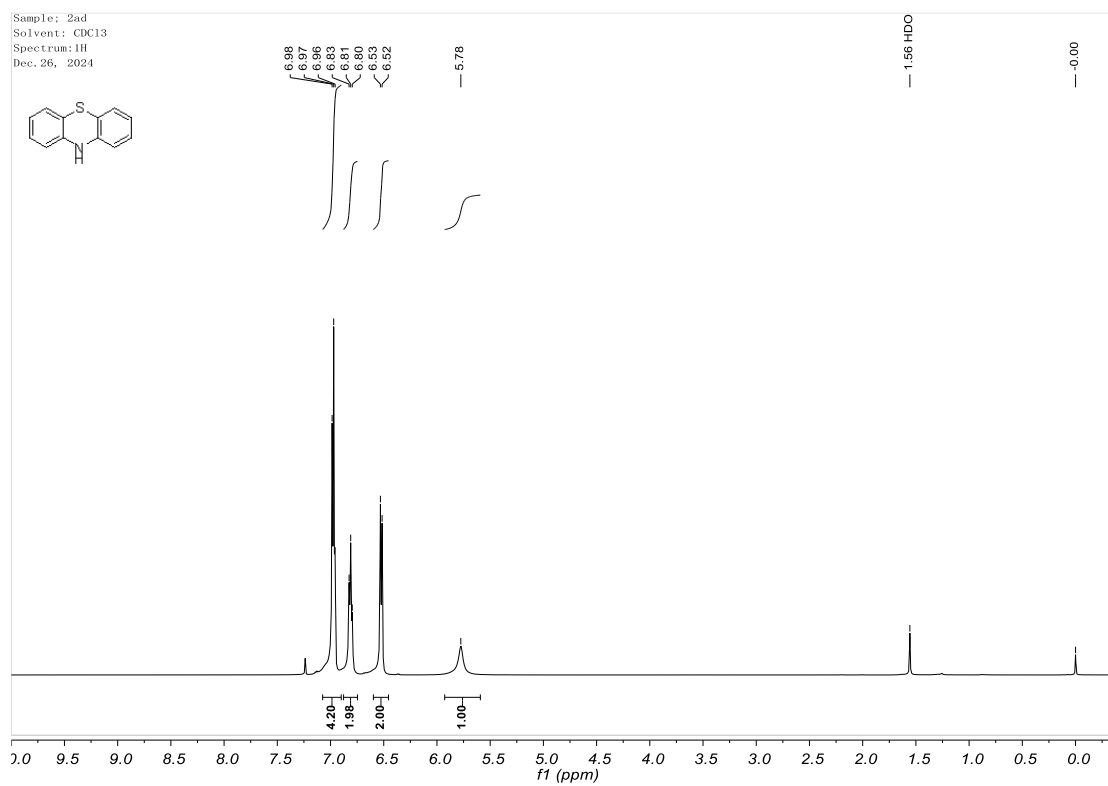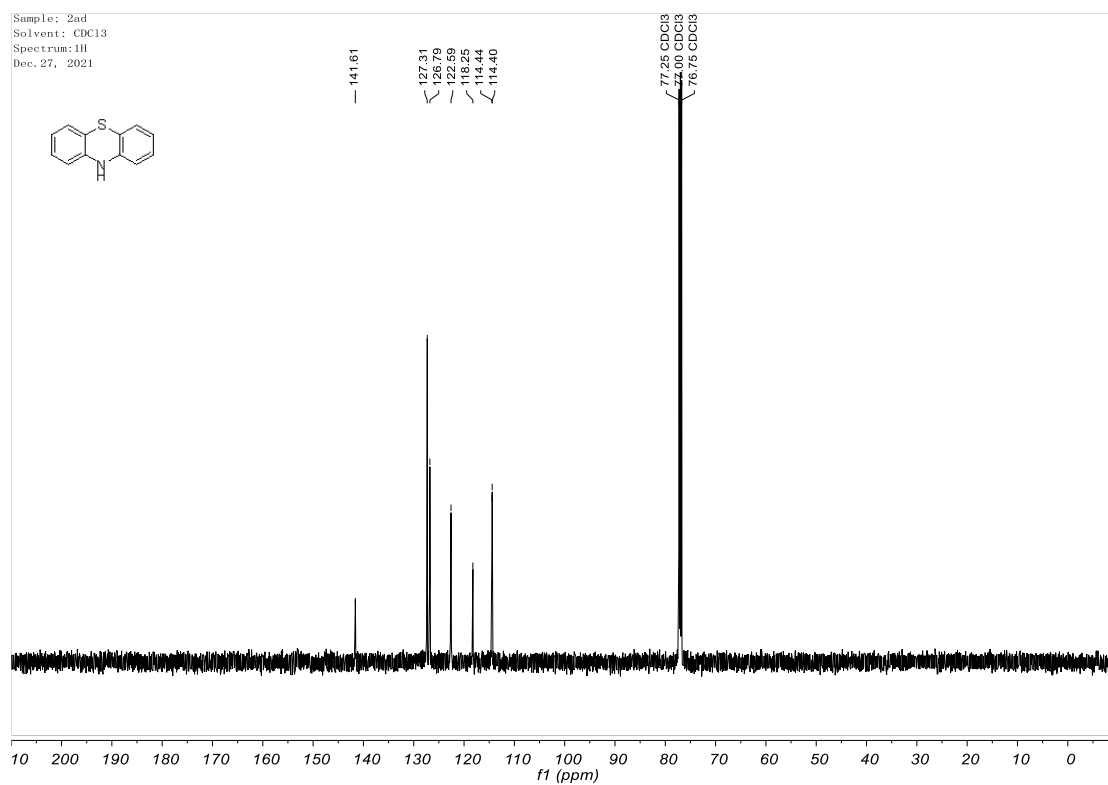

**Fig. 27.**  $^1\text{H}$  NMR (500 MHz,  $\text{CDCl}_3$ ) and  $^{13}\text{C}$  NMR (126 MHz,  $\text{CDCl}_3$ ) spectra of **2af**

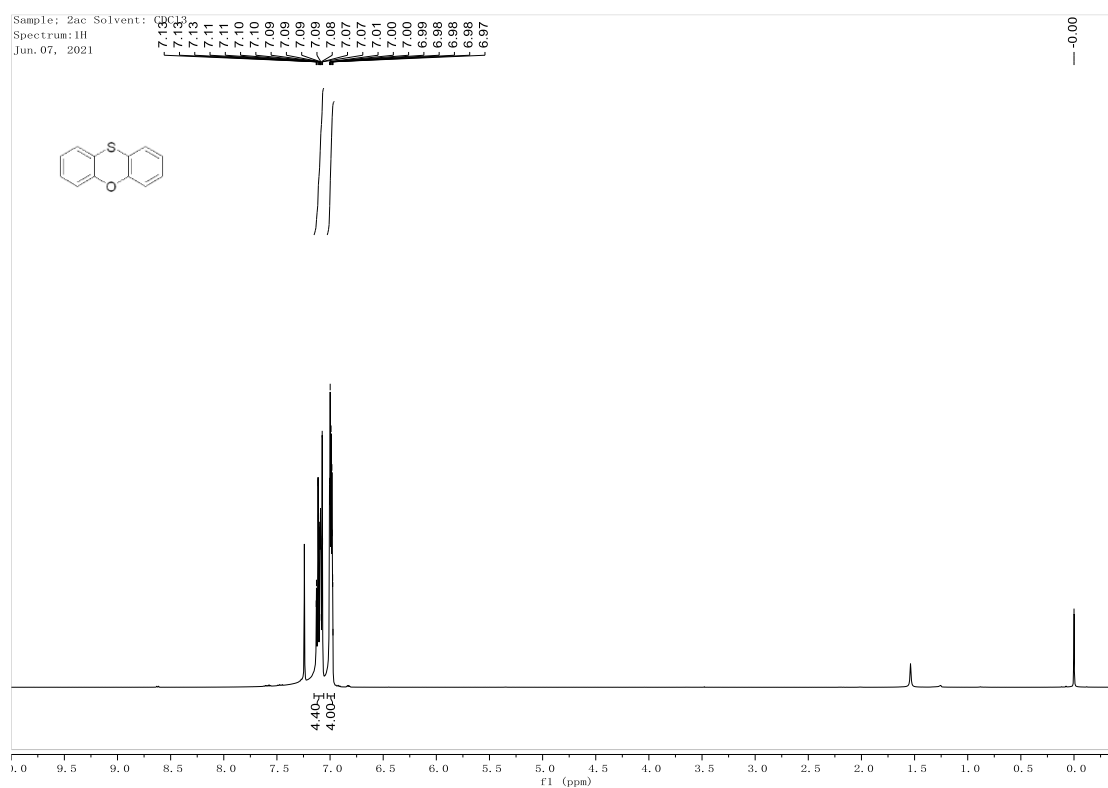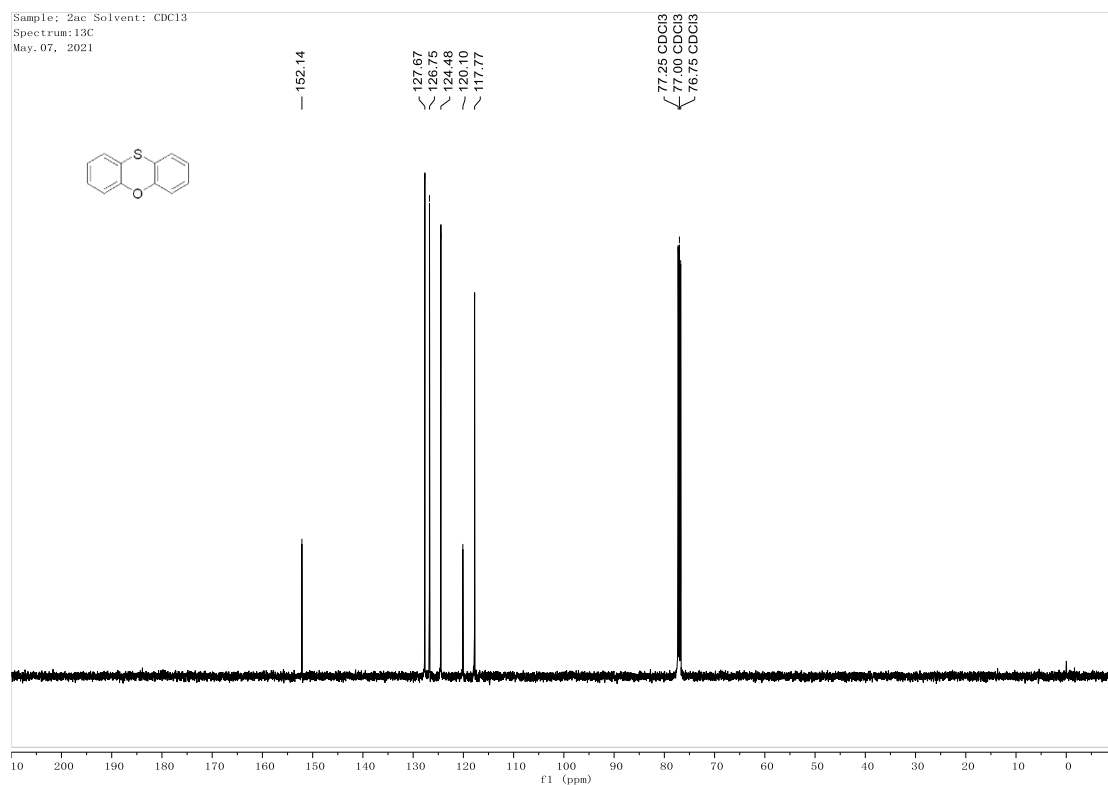

**Fig. 28.**  $^1\text{H}$  NMR (500 MHz,  $\text{CDCl}_3$ ) and  $^{13}\text{C}$  NMR (126 MHz,  $\text{CDCl}_3$ ) spectra of **2ag**

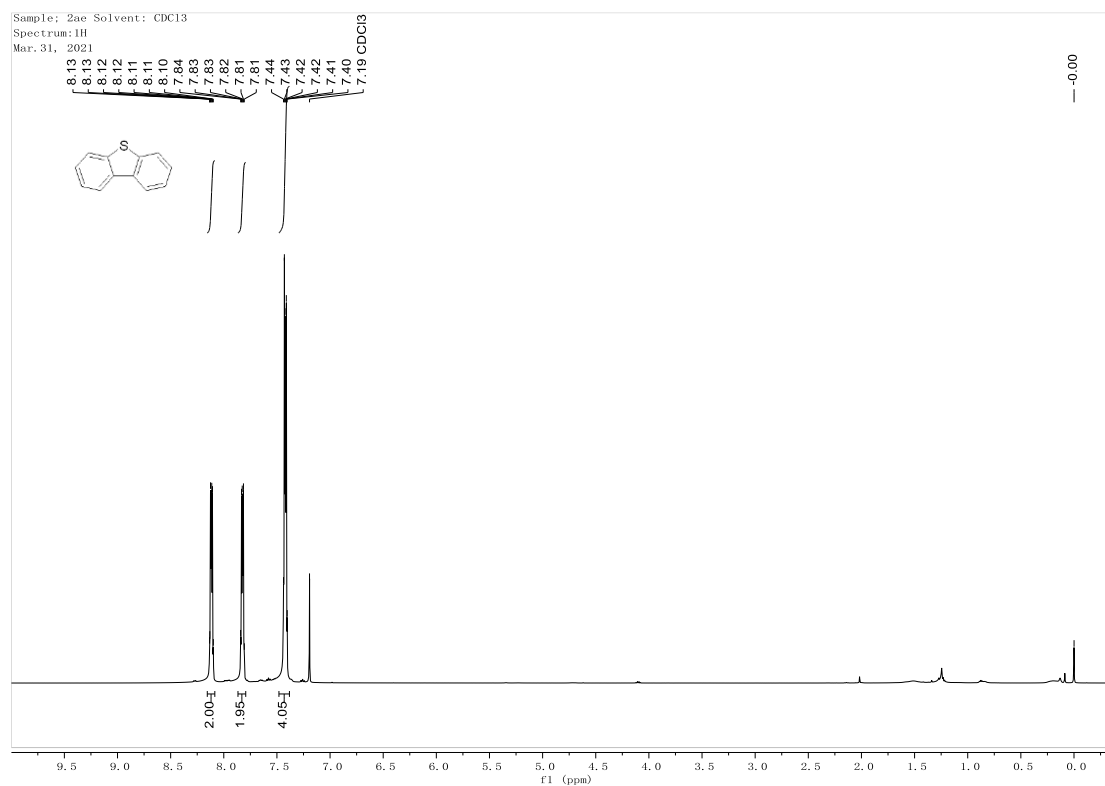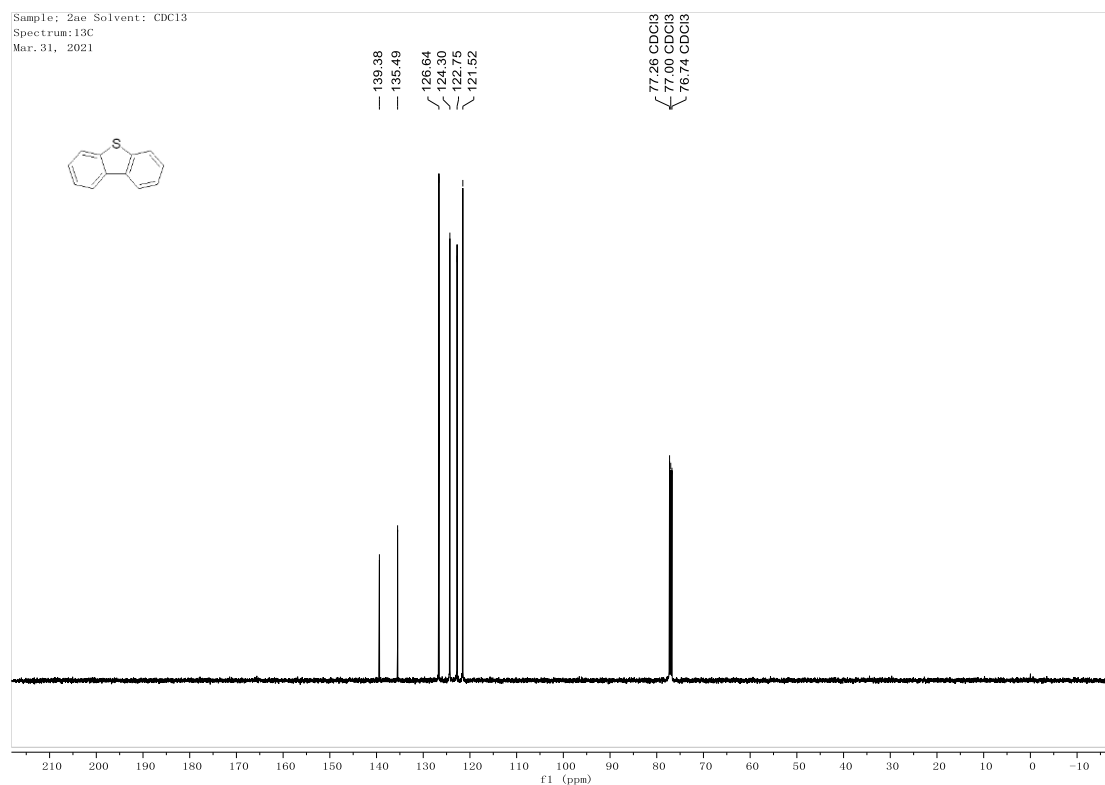

**Fig. 29.**  $^1\text{H}$  NMR (400 MHz,  $\text{CDCl}_3$ ) and  $^{13}\text{C}$  NMR (101 MHz,  $\text{CDCl}_3$ ) spectra of **2ah**

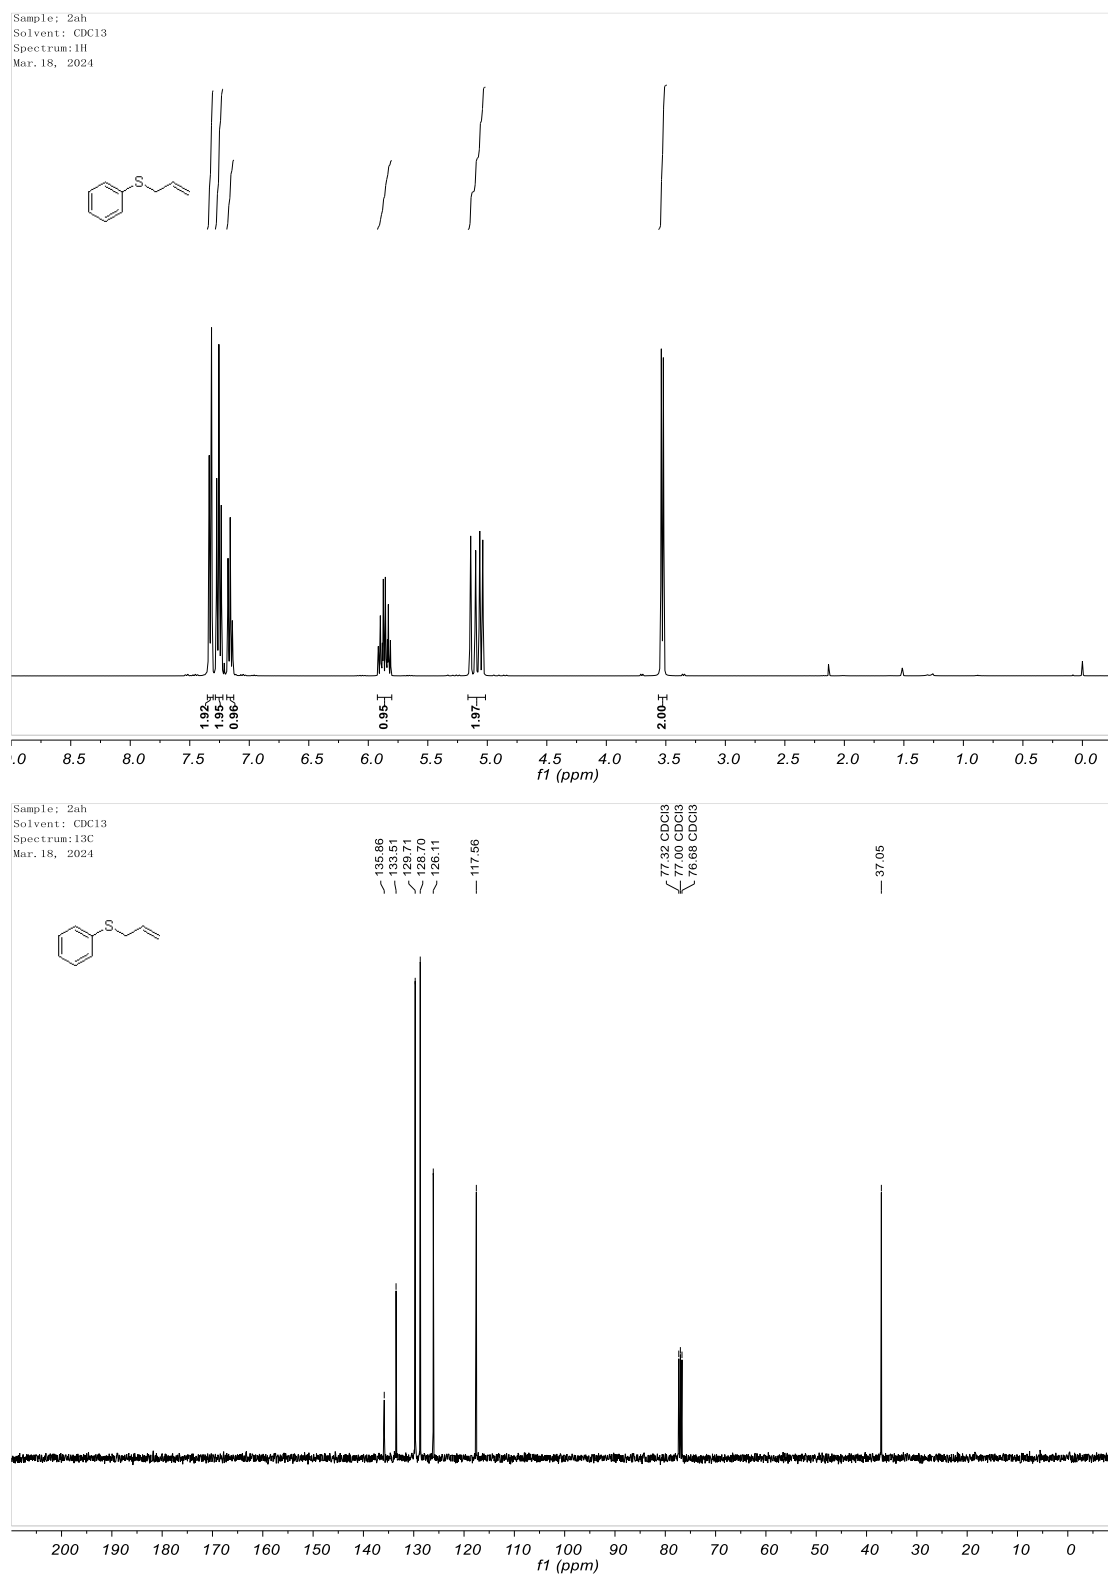

**Fig. 30.  $^1\text{H}$  NMR (400 MHz,  $\text{DMSO-}d_6$ ) and  $^{13}\text{C}$  NMR (101 MHz,  $\text{DMSO-}d_6$ ) spectra of 2ai**

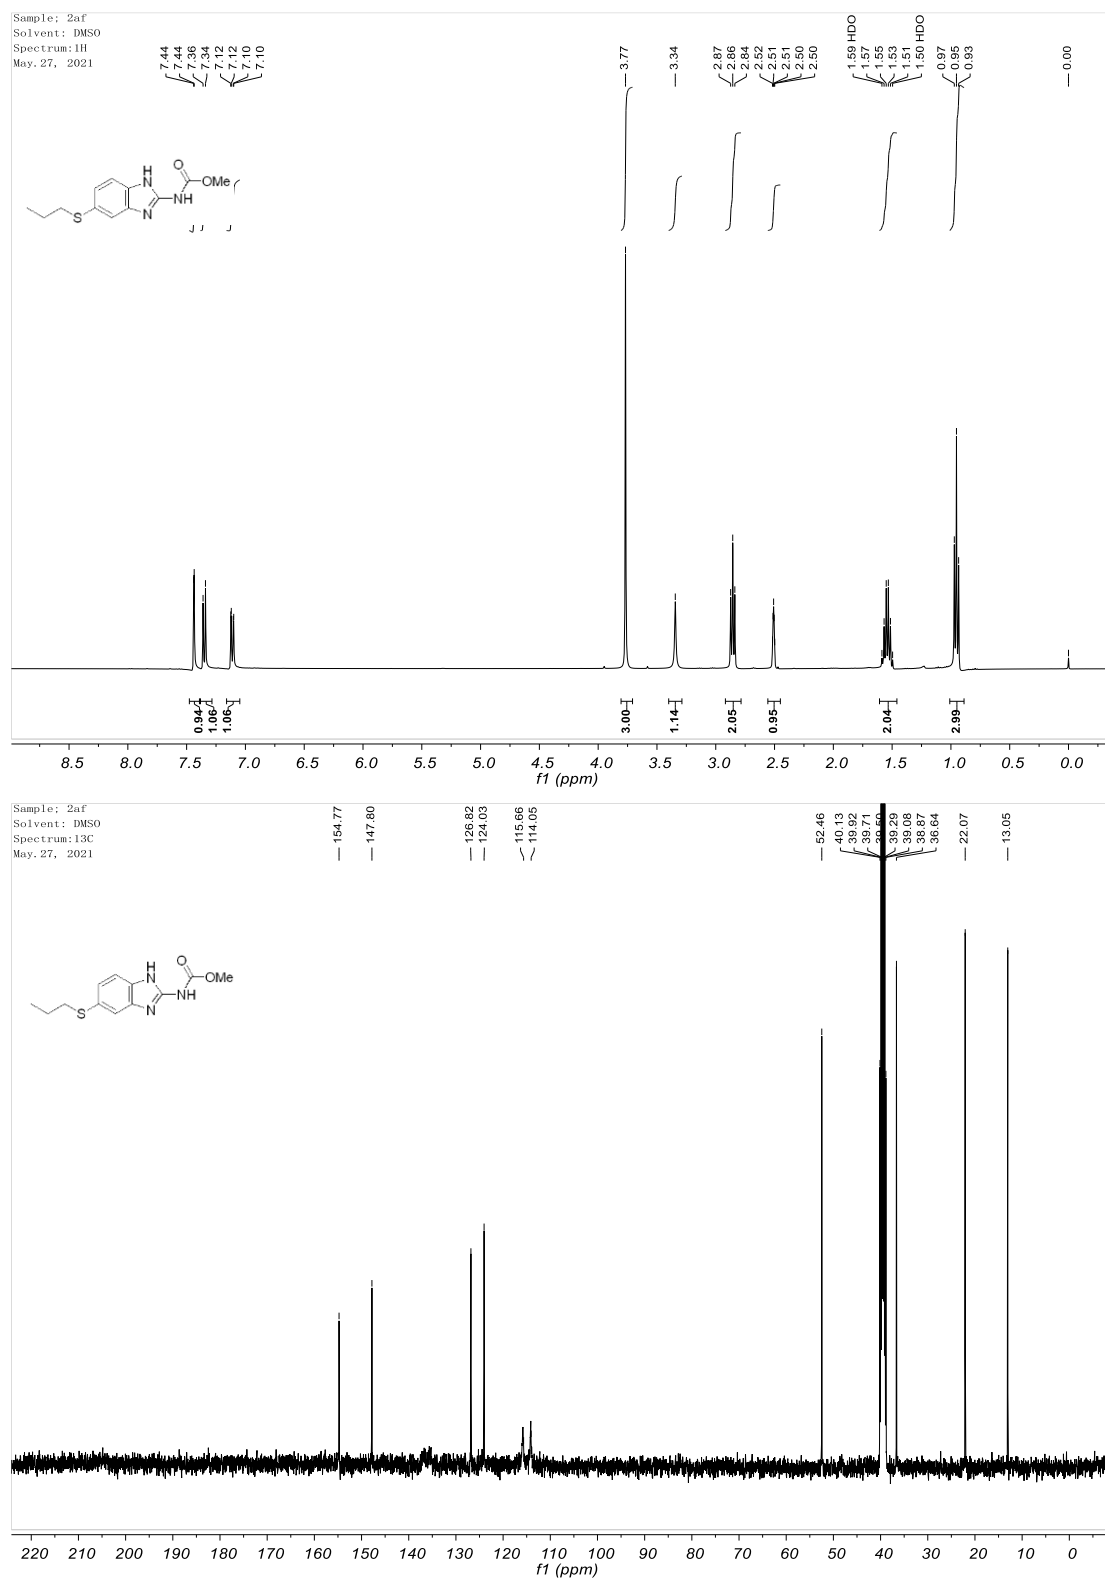



**Fig. 31.  $^1\text{H}$  NMR (400 MHz,  $\text{CDCl}_3$ ),  $^{13}\text{C}$  NMR (101 MHz,  $\text{CDCl}_3$ ) and  $^{19}\text{F}$  NMR spectra of 2aj**

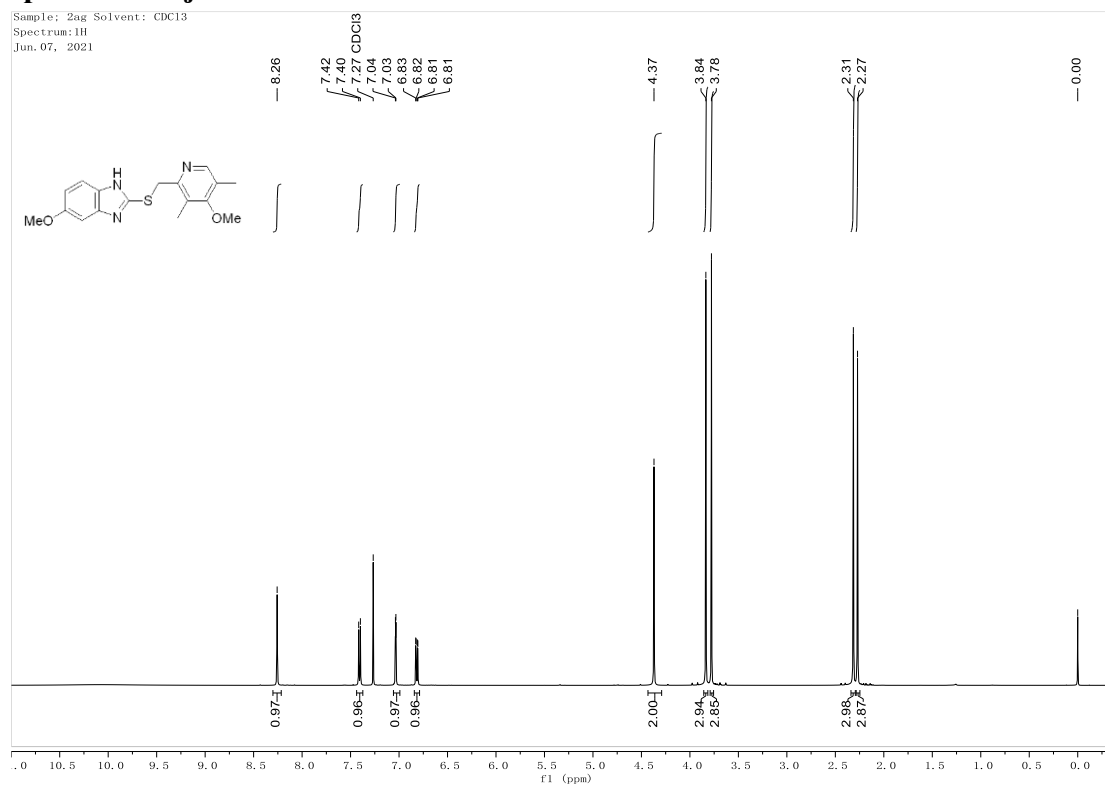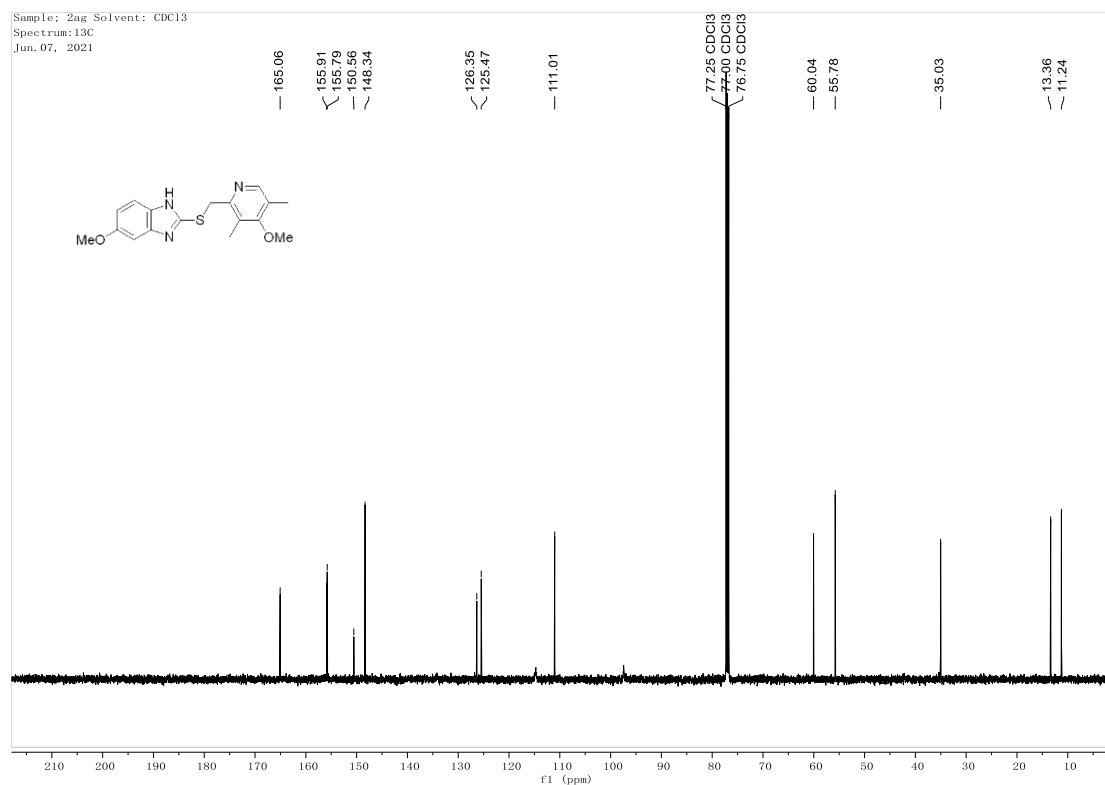

**Fig. 32.**  $^1\text{H}$  NMR (400 MHz,  $\text{CDCl}_3$ ) and  $^{13}\text{C}$  NMR (101 MHz,  $\text{CDCl}_3$ ) spectra of **2ak**

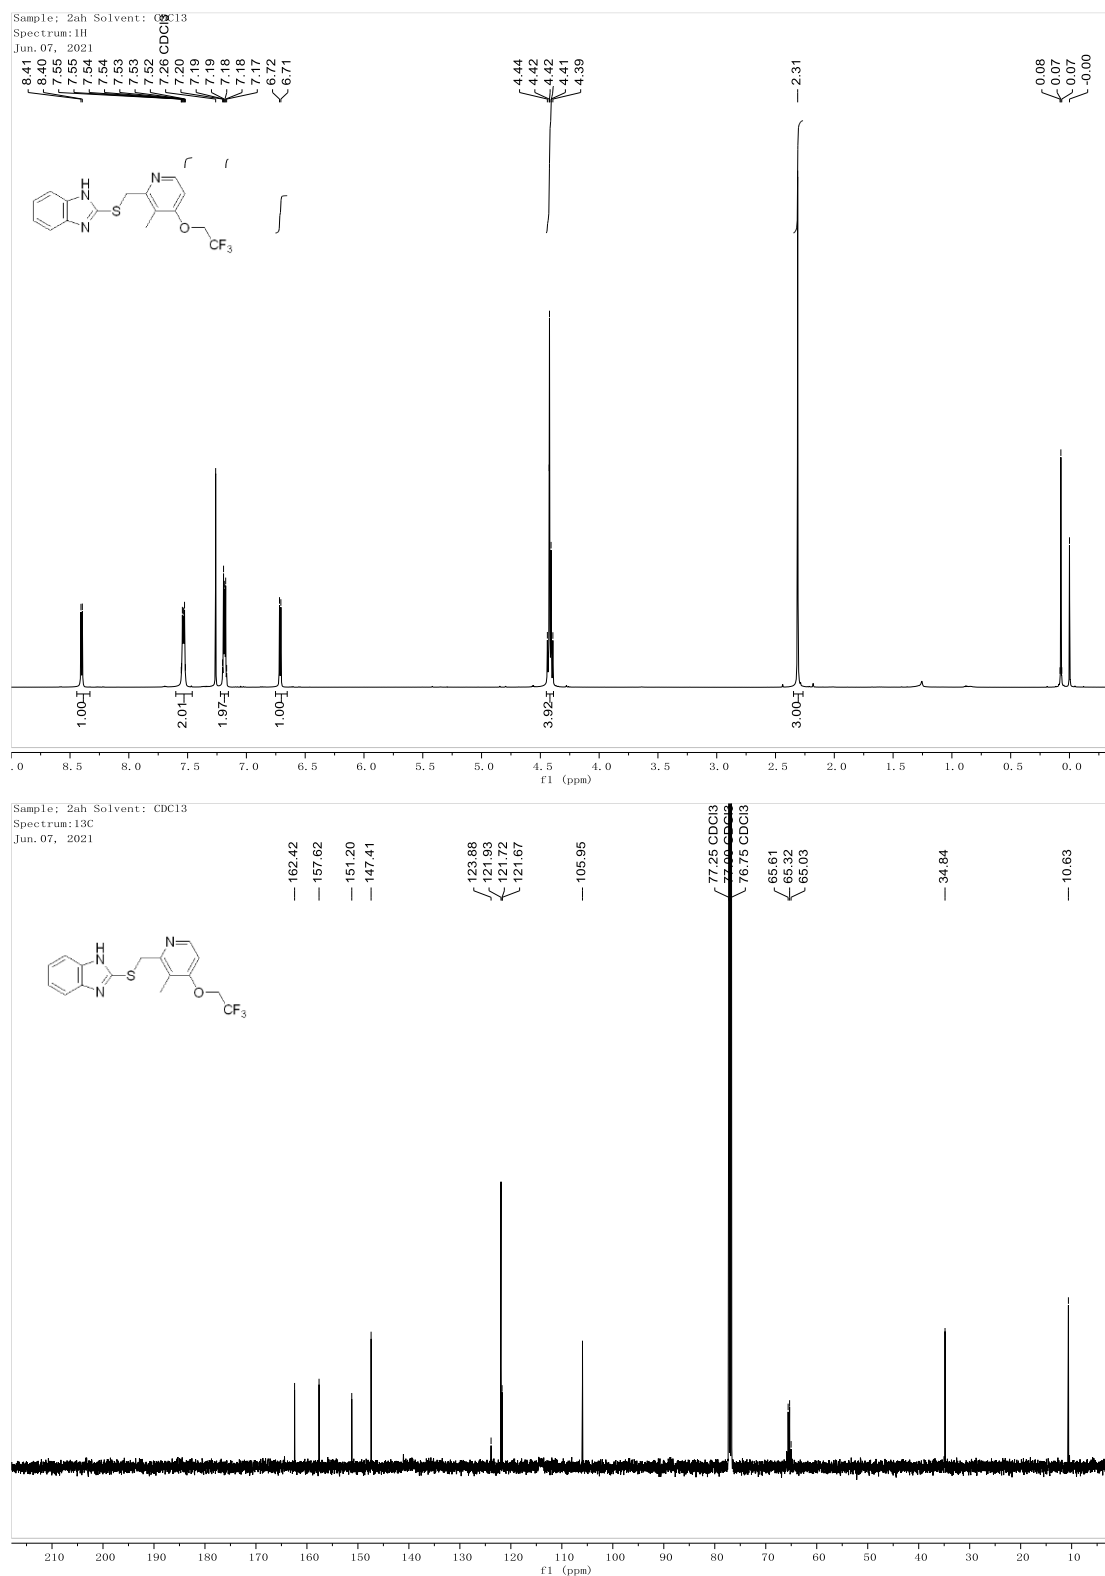

Sample: 3a  
Solvent: CDCl3  
Spectrum: 19F  
Jun. 27, 2021

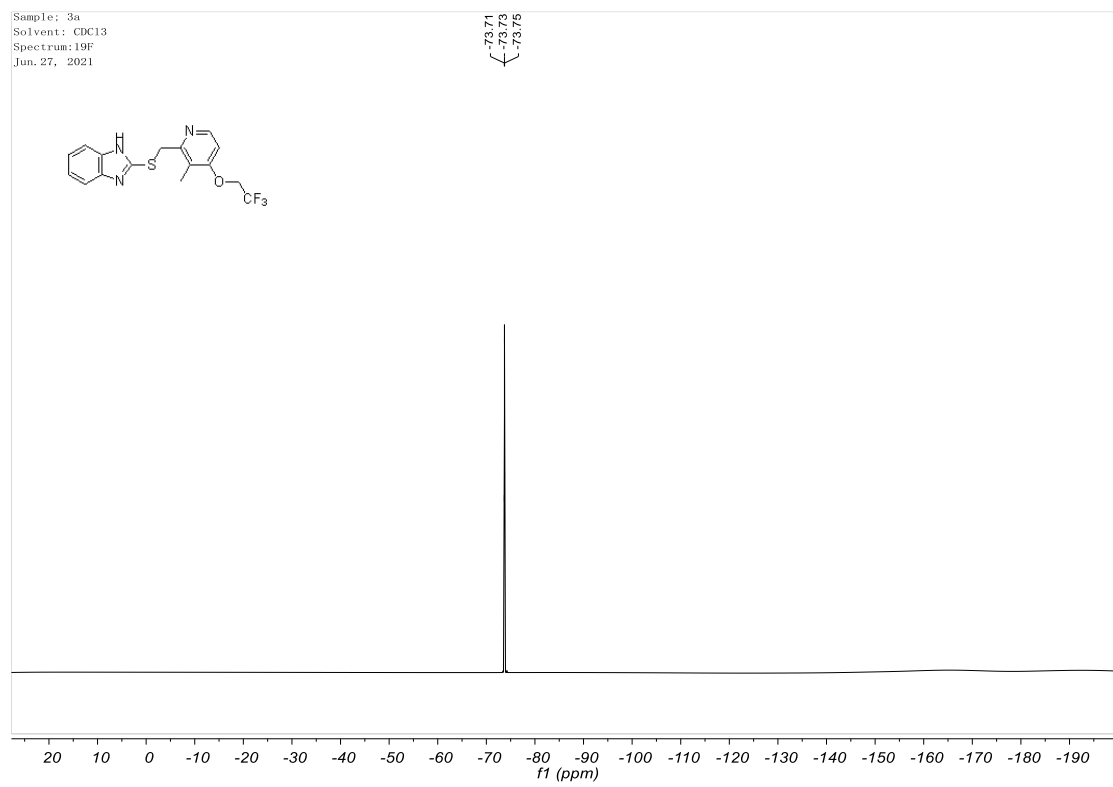

Supplement: d4qo00312h1.pdf [file d4qo00312h1.pdf]
